# Supplementary material for: Molecular and Genomic Characterization of the Pseudomonas syringae Phylogroup 4: An Emerging Pathogen of Arabidopsis thaliana and Nicotiana benthamiana
Source: Microorganisms. 2022 Mar 24;10(4):707. doi: 10.3390/microorganisms10040707 (PMC9030749; doi:10.3390/microorganisms10040707)
Supplement: Supplementary file 1 [file microorganisms-10-00707-s001.zip › microorganisms-1639357-supplementary-Tables.xlsx]

## Sheet: Table S1
	Table S1: List of the 25 reference strains representative of the Pseudomonas syringae complex
	N°	Name	Phylogroup	NCBI accession number
	1	CC1559	PG1	GCA_000452685.2
	2	CC1416	PG1	GCA_000452845.2
	3	Pst DC3000	PG1	GCA_000007805.1
	4	T1	PG1	GCA_009909185.1
	5	B728a	PG2	GCA_000012245.1
	6	CC457	PG2	GCA_000452585.2
	7	Pph1448A	PG3	GCA_000012205.1
	8	ICMP7849	PG3	GCA_003701615.1
	9	CC1513	PG4	GCA_000452765.2
	10	1_6	PG4	GCA_000156995.2
	11	Psy RAYR-BL	PG4	GCA_019904335.1
	12	ES4326	PG5	GCA_000145845.2
	13	ICMP2821	PG5	GCA_003699765.1
	14	ICMP4091	PG6	GCA_001401315.1
	15	ICMP4086	PG6	GCA_003699475.1
	16	TA043	PG7	GCA_000452485.1
	17	ICMP3956	PG7	GCA_001400635.1
	18	CC1524	PG9	GCA_000452745.3
	19	CC1417	PG9	GCA_000452825.2
	20	CC1557	PG10	GCA_000452705.3
	21	CC1466	PG10	GCA_000452785.2
	22	ICMP1649	PG11	GCA_003699995.1
	23	ICMP3353	PG11	GCA_003700275.1
	24	UB246	PG13	GCA_000452865.1
	25	ICMP2236	PG13	GCA_003701285.1
	26	PAO1	outgroup	GCA_000006765.1

## Sheet: Table S2
	Table S2: List of oligonucleotides
	Use	Gene	Sequence 5' - 3'	Orientation	Reference
	Pseudomonas marker	Sequence between genes plsX and rpmF	ATGATCGGAGCGGACAAG	Forward	(Guilbaud et al., 2015)	https://doi.org/10.1093/femsec/fiv146
			GCTCTTGAGGCAAGCACT	Reverse
	Bacterial conserved gene	16S rRNA	CAGGCCTAACACATGCAAGTC	Forward	(Marchesi et al., 1998)	https://doi.org/10.1128/AEM.64.2.795-799.1998
			CGGCGGWGTGTACAAGGC	Reverse
	hopBJ1 clonning	hopBJ1Psy	CACCATGTTTAATAGAATTTCGTCCAGTTTT	Forward	This study
			GTCGGTGGCGTCTTTGGT	Reverse
	hopBJ1 mutations		CACCATGTTTAATAGAATTTCGTCCAGTTTT	Forward
			CTTCAATCGAGCTCCCGTTCAT	Reverse
			GGCATGAACGGGAGCTCGAT	Forward
			GTCGGTGGCGTCTTTGGT	Reverse
	hopBJ1 expression		CTGCAGATCGGGAGAAAG	Forward
			CCCTGACTTCAATCGAGC	Reverse
	bacterial housekeeping	rpoD	TGGGTCGTGAGCAGAAG	Forward	(González-Lamothe et al., 2012)	https://doi.org/10.1105/tpc.111.095190
			CGGATGATGTCTTCCACC	Reverse
	tobacco housekeeping	NbGADPH1	AGCTCAAGGGAATTCTCGATG	Forward	(Liu, D. et al., 2012)	https://doi.org/10.1371/journal.pone.0046451
			AACCTTAACCATGTCATCTCCC	Reverse

## Sheet: Table S3
	Table S3: Annotation results of Psy RAYR-BL genome with Prokka, EggNog Mapper and KAAS analysis.
	Prokka Annotation			KAAS				EggNog Mapper Annotation
	Locus ID	Description		query_name	KEGG KO			Query ID	Gene Name	EggNOG Description	E-Value	Bit-Score	Best Tax-Level	EC Codes	#GO	GOs	GO Names	KEGG KO	KEGG Pathway	COG Categories
	K0038_00001	IS30 family transposase		K0038_00001	K07482			K0038_00001		COG2826 Transposase and inactivated derivatives, IS30 family	7.30E-66	256.5	Gammaproteobacteria		0					L
	K0038_00002	hypothetical protein		K0038_00002				K0038_00004			1.60E-5	55.8	Pseudomonas putida group		0
	K0038_00003	hypothetical protein		K0038_00003				K0038_00005			4.00E-30	138.3	Betaproteobacteria		0
	K0038_00004	hypothetical protein		K0038_00004				K0038_00006			1.40E-6	60.1	Gammaproteobacteria		0
	K0038_00005	protein of unknown function		K0038_00005				K0038_00007		TniQ	2.10E-48	199.9	Gammaproteobacteria		0					S
	K0038_00006	hypothetical protein		K0038_00006				K0038_00008	tniB	Bacterial TniB protein	4.50E-78	298.1	Gammaproteobacteria	EC:3.6.1.3	0			K07132		S
	K0038_00007	tniQ family protein		K0038_00007				K0038_00009	tniA	Integrase catalytic	3.40E-197	694.9	Gammaproteobacteria		0			K07497		L
	K0038_00008	transposition ATP-binding protein		K0038_00008				K0038_00010		TnsA endonuclease C terminal	3.70E-61	241.5	Gammaproteobacteria		0					S
	K0038_00009	transposase		K0038_00009	K07497			K0038_00011	comM	Magnesium chelatase, subunit ChlI C-terminal	1.10E-95	355.9	Pseudomonas syringae group		0			K07391		O
	K0038_00010	putative uncharacterized protein		K0038_00010				K0038_00012	citN	Citrate transporter	5.70E-231	806.6	Pseudomonas syringae group		0			K03300		C
	K0038_00011	Mg chelatase-related protein		K0038_00011	K07391			K0038_00013		Aminoacyl-tRNA editing domain	3.30E-253	880.6	Pseudomonas syringae group		0			K19055		T
	K0038_00012	citrate transporter		K0038_00012	K03300			K0038_00014	recG	Critical role in recombination and DNA repair. Helps process Holliday junction intermediates to mature products by catalyzing branch migration. Has a DNA unwinding activity characteristic of a DNA helicase with a 3'- to 5'- polarity. Unwinds branched duplex DNA (Y-DNA)	0.00E0	1352	Pseudomonas syringae group	EC:3.6.4.12	10	F:GO:0016887; F:GO:0003678; P:GO:0009314; C:GO:0009379; C:GO:0005886; P:GO:0032508; F:GO:0003724; C:GO:0048476; P:GO:0010501; C:GO:0005829	P:response to radiation; P:RNA secondary structure unwinding; C:Holliday junction helicase complex; C:Holliday junction resolvase complex; F:DNA helicase activity; F:ATP hydrolysis activity; P:DNA duplex unwinding; F:RNA helicase activity; C:cytosol; C:plasma membrane	K03655	map03440	L
	K0038_00013	hypothetical protein		K0038_00013				K0038_00016	oxyR	Oxidative stress regulatory protein OxyR	1.10E-169	602.4	Pseudomonas syringae group		0			K04761	map02026	K
	K0038_00014	ATP-dependent DNA helicase RecG		K0038_00014	K03655			K0038_00017	tonB	Interacts with outer membrane receptor proteins that carry out high-affinity binding and energy dependent uptake into the periplasmic space of specific substrates. It could act to transduce energy from the cytoplasmic membrane to specific energy- requiring processes in the outer membrane, resulting in the release into the periplasm of ligands bound by these outer membrane proteins	5.80E-63	247.7	Pseudomonas syringae group		0			K03832		M
	K0038_00016	LysR family transcriptional regulator		K0038_00016	K04761			K0038_00018	exbD	Biopolymer transport protein ExbD/TolR	1.40E-69	268.9	Pseudomonas syringae group		6	F:GO:0042802; C:GO:0005887; P:GO:0007165; F:GO:0031992; C:GO:0098797; P:GO:0050821	P:protein stabilization; C:integral component of plasma membrane; F:identical protein binding; P:signal transduction; F:energy transducer activity; C:plasma membrane protein complex	K03559,K03560		U
	K0038_00017	energy transducer TonB		K0038_00017	K03832			K0038_00019	exbB	TonB system transport protein	2.00E-132	478.8	Pseudomonas syringae group		6	F:GO:0042802; C:GO:0005887; P:GO:0007165; F:GO:0031992; C:GO:0098797; P:GO:0050821	P:protein stabilization; C:integral component of plasma membrane; F:identical protein binding; P:signal transduction; F:energy transducer activity; C:plasma membrane protein complex	K03561,K03562	map01120	U
	K0038_00018	TonB system transport protein ExbD		K0038_00018	K03559			K0038_00020	yeeZ	NAD(P)H-binding	1.60E-154	552	Pseudomonas syringae group	EC:1.5.5.1	0			K00311		GM
	K0038_00019	outer membrane transport energization protein ExbB		K0038_00019	K03561			K0038_00021			7.10E-138	496.5	Pseudomonas syringae group		0
	K0038_00020	NAD-dependent epimerase/dehydratase family protein		K0038_00020				K0038_00022	tdcF	Endoribonuclease L-PSP	7.30E-62	243	Pseudomonas syringae group	EC:3.5.99.10	0			K09022		J
	K0038_00021	lipoprotein, putative		K0038_00021				K0038_00023	spoT	In eubacteria ppGpp (guanosine 3'-diphosphate 5-' diphosphate) is a mediator of the stringent response that coordinates a variety of cellular activities in response to changes in nutritional abundance	0.00E0	1378.6	Pseudomonas syringae group	EC:2.7.6.5; EC:3.1.7.2	9	F:GO:0008728; P:GO:1901068; P:GO:0015969; P:GO:0009267; P:GO:0015949; C:GO:0005886; F:GO:0008893; C:GO:0005618; C:GO:0005829	C:cell wall; P:cellular response to starvation; F:GTP diphosphokinase activity; F:guanosine-3',5'-bis(diphosphate) 3'-diphosphatase activity; P:guanosine-containing compound metabolic process; P:nucleobase-containing small molecule interconversion; P:guanosine tetraphosphate metabolic process; C:cytosol; C:plasma membrane	K00951,K01139	map00230	KT
	K0038_00022	RidA family protein		K0038_00022				K0038_00024	rpoZ	Promotes RNA polymerase assembly. Latches the N- and C- terminal regions of the beta' subunit thereby facilitating its interaction with the beta and alpha subunits	2.40E-40	171	Pseudomonas syringae group	EC:2.7.7.6	6	C:GO:0030880; F:GO:0003899; P:GO:0006351; C:GO:0005618; C:GO:0005829; P:GO:0040007	P:transcription, DNA-templated; C:cell wall; F:DNA-directed 5'-3' RNA polymerase activity; P:growth; C:RNA polymerase complex; C:cytosol	K03060	map00230,map00240,map01100,map03020	K
	K0038_00023	RelA/SpoT protein		K0038_00023	K01139			K0038_00025	gmk	Essential for recycling GMP and indirectly, cGMP	2.10E-114	418.3	Pseudomonas syringae group	EC:2.7.4.8; EC:4.1.1.23	9	P:GO:0016310; F:GO:0042802; P:GO:0046710; P:GO:1901068; P:GO:0046037; P:GO:0046940; P:GO:0015949; F:GO:0004385; C:GO:0005829	P:nucleoside monophosphate phosphorylation; P:GDP metabolic process; F:identical protein binding; P:phosphorylation; P:guanosine-containing compound metabolic process; P:GMP metabolic process; P:nucleobase-containing small molecule interconversion; C:cytosol; F:guanylate kinase activity	K00942,K01591	map00230,map00240,map01100	F
	K0038_00024	DNA-directed RNA polymerase omega chain (RNAP omegasubunit) (Transcriptase omega chain) (RNA polymerase omega subunit)		K0038_00024	K03060			K0038_00026	yicC	Domain of unknown function (DUF1732)	2.60E-147	528.1	Pseudomonas syringae group		5	F:GO:0000175; P:GO:0016075; P:GO:0090503; F:GO:0009022; C:GO:0005829	F:3'-5'-exoribonuclease activity; P:RNA phosphodiester bond hydrolysis, exonucleolytic; P:rRNA catabolic process; F:tRNA nucleotidyltransferase activity; C:cytosol			S
	K0038_00025	guanylate kinase		K0038_00025	K00942			K0038_00027	rph	Phosphorolytic exoribonuclease that removes nucleotide residues following the -CCA terminus of tRNA and adds nucleotides to the ends of RNA molecules by using nucleoside diphosphates as substrates	1.10E-127	462.6	Pseudomonas syringae group	EC:3.6.1.66; EC:2.7.7.56	5	P:GO:0031125; P:GO:0090501; P:GO:0016075; P:GO:0008033; F:GO:0004540	P:RNA phosphodiester bond hydrolysis; F:ribonuclease activity; P:tRNA processing; P:rRNA catabolic process; P:rRNA 3'-end processing	K00989,K02428	map00230	J
	K0038_00026	hypothetical protein		K0038_00026				K0038_00028		Domain of unknown function (DUF4870)	2.10E-58	231.5	Pseudomonas syringae group		0			K09940		S
	K0038_00027	ribonuclease PH		K0038_00027	K00989			K0038_00029	exoA	Endonuclease/Exonuclease/phosphatase family	1.50E-149	535.4	Pseudomonas syringae group	EC:3.1.11.2	0			K01142	map03410	L
	K0038_00028	hypothetical protein		K0038_00028	K09940			K0038_00030	pyrE	Catalyzes the transfer of a ribosyl phosphate group from 5-phosphoribose 1-diphosphate to orotate, leading to the formation of orotidine monophosphate (OMP)	5.30E-113	413.7	Pseudomonas syringae group	EC:2.4.2.10	5	F:GO:0000287; F:GO:0004588; P:GO:0009220; P:GO:0006207; C:GO:0005829	F:magnesium ion binding; P:pyrimidine ribonucleotide biosynthetic process; P:'de novo' pyrimidine nucleobase biosynthetic process; F:orotate phosphoribosyltransferase activity; C:cytosol	K00762	map00240,map01100	F
	K0038_00029	exodeoxyribonuclease III		K0038_00029	K01142			K0038_00031		Pfam Transposase IS66	2.60E-88	331.6	Pseudomonas syringae group		0					S
	K0038_00030	orotate phosphoribosyltransferase		K0038_00030	K00762			K0038_00032	argB	Belongs to the acetylglutamate kinase family. ArgB subfamily	8.40E-165	586.3	Pseudomonas syringae group	EC:2.3.1.1; EC:2.7.2.8	8	F:GO:0034618; P:GO:0016310; F:GO:0042802; F:GO:0003991; C:GO:0005886; P:GO:0006526; C:GO:0005618; P:GO:0040007	C:cell wall; P:growth; P:arginine biosynthetic process; F:identical protein binding; F:arginine binding; P:phosphorylation; F:acetylglutamate kinase activity; C:plasma membrane	K00930,K14682	map00220,map01100,map01110,map01130,map01210,map01230	F
	K0038_00031	hypothetical protein		K0038_00031				K0038_00033	algC	Phosphoglucomutase/phosphomannomutase, alpha/beta/alpha domain III	0.00E0	1559.7	Pseudomonas syringae group	EC:5.4.2.2; EC:5.4.2.8	8	F:GO:0000287; F:GO:0004614; P:GO:0009244; P:GO:0042121; P:GO:0009243; P:GO:0044419; P:GO:0006805; F:GO:0004615	P:O antigen biosynthetic process; F:magnesium ion binding; F:phosphoglucomutase activity; F:phosphomannomutase activity; P:lipopolysaccharide core region biosynthetic process; P:alginic acid biosynthetic process; P:biological process involved in interspecies interaction between organisms; P:xenobiotic metabolic process	K01835,K01840,K15778	map00010,map00030,map00051,map00052,map00230,map00500,map00520,map00521,map01100,map01110,map01120,map01130	G
	K0038_00032	acetylglutamate kinase		K0038_00032	K00930			K0038_00034	dut	This enzyme is involved in nucleotide metabolism it produces dUMP, the immediate precursor of thymidine nucleotides and it decreases the intracellular concentration of dUTP so that uracil cannot be incorporated into DNA	7.80E-79	299.7	Pseudomonas syringae group	EC:3.6.1.23; EC:4.1.1.36; EC:6.3.2.5	5	F:GO:0000287; P:GO:0034404; P:GO:0046081; F:GO:0004170; P:GO:0006226	P:dUTP catabolic process; F:magnesium ion binding; P:nucleobase-containing small molecule biosynthetic process; F:dUTP diphosphatase activity; P:dUMP biosynthetic process	K01520,K13038	map00240,map00770,map00983,map01100	F
	K0038_00033	Phosphomannomutase / Phosphoglucomutase		K0038_00033	K15778			K0038_00035	coaBC	Catalyzes two steps in the biosynthesis of coenzyme A. In the first step cysteine is conjugated to 4'-phosphopantothenate to form 4-phosphopantothenoylcysteine, in the latter compound is decarboxylated to form 4'-phosphopantotheine	9.60E-228	795.8	Pseudomonas syringae group	EC:4.1.1.36; EC:6.3.2.5	5	F:GO:0004633; P:GO:0015937; F:GO:0004632; F:GO:0010181; C:GO:0005829	F:phosphopantothenoylcysteine decarboxylase activity; F:FMN binding; P:coenzyme A biosynthetic process; C:cytosol; F:phosphopantothenate--cysteine ligase activity	K01598,K13038	map00770,map01100	H
	K0038_00034	deoxyuridine 5'-triphosphate nucleotidohydrolase		K0038_00034	K01520			K0038_00036	radC	Belongs to the UPF0758 family	2.90E-114	417.9	Pseudomonas syringae group		1	P:GO:0006281	P:DNA repair	K03630		L
	K0038_00035	phosphopantothenoylcysteine decarboxylase/phosphopantothenate--cysteine ligase		K0038_00035	K13038			K0038_00037	sapA	extracellular solute-binding protein	1.50E-294	1018.1	Pseudomonas syringae group		0			K02035,K12368,K19226	map01503,map02010,map02024,map02030	E
	K0038_00036	DNA repair protein RadC		K0038_00036	K03630			K0038_00038	rpmB	Belongs to the bacterial ribosomal protein bL28 family	2.50E-36	157.5	Pseudomonas syringae group		4	P:GO:0006412; C:GO:0022625; F:GO:0003735; P:GO:0000027	F:structural constituent of ribosome; C:cytosolic large ribosomal subunit; P:ribosomal large subunit assembly; P:translation	K02902	map03010	J
	K0038_00037	bacterial extracellular solute-binding protein, family 5		K0038_00037	K12368			K0038_00039	rpmG	Belongs to the bacterial ribosomal protein bL33 family	7.30E-21	105.5	Gammaproteobacteria		5	P:GO:0006412; P:GO:0046677; C:GO:0022625; F:GO:0003735; P:GO:0000027	F:structural constituent of ribosome; C:cytosolic large ribosomal subunit; P:response to antibiotic; P:ribosomal large subunit assembly; P:translation	K02913	map03010	J
	K0038_00038	ribosomal protein L28		K0038_00038	K02902			K0038_00040			8.40E-17	92.4	Pseudomonas syringae group		0
	K0038_00039	50S ribosomal protein L33		K0038_00039	K02913			K0038_00041		Protein of unknown function (DUF861)	4.40E-64	250.4	Pseudomonas syringae group		0			K06995		S
	K0038_00040	Peptidase inhibitor I78 family protein		K0038_00040				K0038_00042	aldH	belongs to the aldehyde dehydrogenase family	8.70E-260	902.5	Pseudomonas syringae group	EC:1.2.1.99; EC:1.2.1.54	0			K09472,K12254	map00330,map01100	C
	K0038_00041	hypothetical protein		K0038_00041	K06995			K0038_00043	ycaD	Major Facilitator Superfamily	2.80E-197	694.5	Pseudomonas syringae group		1	C:GO:0005886	C:plasma membrane	K08219		EGP
	K0038_00042	gamma-glutamyl-gamma-aminobutyraldehyde dehydrogenase		K0038_00042	K12254			K0038_00044	ymdC	Phospholipase D. Active site motifs.	8.90E-281	972.2	Pseudomonas syringae group	EC:2.7.8.8	0			K00998,K06131,K06132	map00260,map00564,map01100,map01110	I
	K0038_00043	membrane protein, putative		K0038_00043				K0038_00045	yjiR	helix_turn_helix gluconate operon transcriptional repressor	1.40E-267	928.3	Pseudomonas syringae group		1	P:GO:0006351	P:transcription, DNA-templated			K
	K0038_00044	phospholipase D family protein		K0038_00044	K06132			K0038_00046		Domain of unknown function (DUF1127)	2.60E-36	157.5	Pseudomonas syringae group		0					S
	K0038_00045	transcriptional regulator, GntR family/aminotransferase, classes I and II family protein		K0038_00045				K0038_00047		COG0665 Glycine D-amino acid oxidases (deaminating)	4.40E-239	833.6	Pseudomonas syringae group		0			K09471	map00330,map01100	E
	K0038_00046	hypothetical protein		K0038_00046				K0038_00048		Putative zinc- or iron-chelating domain	6.10E-63	246.5	Pseudomonas syringae group		0			K06940		S
	K0038_00047	hypothetical protein		K0038_00047	K09471			K0038_00049	lrp	AsnC-type helix-turn-helix domain	1.50E-83	315.5	Pseudomonas syringae group		0			K03719,K05800		K
	K0038_00048	hypothetical protein		K0038_00048	K06940			K0038_00050	dadA	Oxidative deamination of D-amino acids	2.00E-244	851.3	Pseudomonas syringae group	EC:1.4.5.1	4	C:GO:0009324; P:GO:0055130; C:GO:0005737; F:GO:0008718	C:D-amino-acid dehydrogenase complex; P:D-alanine catabolic process; C:cytoplasm; F:D-amino-acid dehydrogenase activity	K00285	map00360	C
	K0038_00049	Leucine-responsive regulatory protein		K0038_00049	K03719			K0038_00051	IV02_05570	Endoribonuclease L-PSP	2.20E-57	228	Pseudomonas syringae group		0					J
	K0038_00050	D-amino acid dehydrogenase, small subunit		K0038_00050	K00285			K0038_00052	alr	Catalyzes the interconversion of L-alanine and D- alanine. May also act on other amino acids	4.10E-179	634	Gammaproteobacteria	EC:5.1.1.1	5	F:GO:0030170; P:GO:0009252; F:GO:0008784; P:GO:0030632; P:GO:0040007	P:growth; F:pyridoxal phosphate binding; P:peptidoglycan biosynthetic process; F:alanine racemase activity; P:D-alanine biosynthetic process	K01775	map00473,map01100,map01502	E
	K0038_00051	endoribonuclease L-PSP family protein		K0038_00051				K0038_00053	puuR	Helix-turn-helix domain	4.40E-92	344	Pseudomonas syringae group		0					K
	K0038_00052	alanine racemase		K0038_00052	K01775			K0038_00054	cycB	Cytochrome C oxidase, cbb3-type, subunit III	8.90E-45	186	Pseudomonas syringae group		0					C
	K0038_00053	DNA-binding protein		K0038_00053				K0038_00055		Acetyl-CoA hydrolase/transferase C-terminal domain	0.00E0	1263.8	Pseudomonas syringae group		0			K18122	map00650,map01100,map01200	C
	K0038_00054	cytochrome c5 family protein		K0038_00054				K0038_00056		membrane transporter protein	1.50E-128	465.7	Pseudomonas syringae group		0			K07090		S
	K0038_00055	acetyl-CoA hydrolase/transferase family protein		K0038_00055				K0038_00057	fccB	Pyridine nucleotide-disulphide oxidoreductase	6.70E-229	799.7	Pseudomonas syringae group	EC:1.8.5.4	0			K17218	map00920	S
	K0038_00056	membrane protein, putative		K0038_00056	K07090			K0038_00058	ethE1	Metallo-beta-lactamase superfamily	3.10E-156	557.8	Pseudomonas syringae group		0					S
	K0038_00057	FAD-dependent oxidoreductase		K0038_00057	K17218			K0038_00059		Bacterial regulatory protein, Fis family	2.80E-233	814.3	Pseudomonas syringae group		0			K10941	map02020,map02025,map05111	K
	K0038_00058	metallo-beta-lactamase superfamily protein		K0038_00058				K0038_00060	xpt	Converts the preformed base xanthine, a product of nucleic acid breakdown, to xanthosine 5'-monophosphate (XMP), so it can be reused for RNA or DNA synthesis	2.20E-94	351.7	Pseudomonas syringae group	EC:2.4.2.7; EC:2.4.2.22	2	P:GO:0006166; F:GO:0016763	P:purine ribonucleoside salvage; F:pentosyltransferase activity	K00759,K03816	map00230,map01100,map01110	F
	K0038_00059	sigma-54 dependent transcriptional regulator		K0038_00059				K0038_00061	rep	it can initiate unwinding at a nick in the DNA. It binds to the single-stranded DNA and acts in a progressive fashion along the DNA in the 3' to 5' direction	0.00E0	1338.2	Pseudomonas syringae group	EC:3.6.4.12	6	F:GO:0016887; P:GO:0006268; F:GO:0003678; P:GO:0009314; P:GO:0044787; P:GO:0006259	P:response to radiation; F:DNA helicase activity; P:DNA metabolic process; F:ATP hydrolysis activity; P:bacterial-type DNA replication; P:DNA unwinding involved in DNA replication	K03656,K03657	map03420,map03430	L
	K0038_00060	xanthine phosphoribosyltransferase		K0038_00060	K03816			K0038_00062		GGDEF domain	3.20E-295	1020.4	Pseudomonas syringae group		0					T
	K0038_00061	ATP-dependent DNA helicase Rep		K0038_00061	K03656			K0038_00063	norM	multidrug	5.20E-243	846.7	Pseudomonas syringae group		0			K03327		V
	K0038_00062	GGDEF domain/EAL domain protein		K0038_00062				K0038_00064		Transcriptional regulator	5.70E-169	600.1	Pseudomonas syringae group		0			K03566	map02026	K
	K0038_00063	multidrug transporter		K0038_00063	K03327			K0038_00065		chemotaxis protein	0.00E0	1145.6	Pseudomonas syringae group		0			K03406,K05875	map02020,map02030	T
	K0038_00064	transcriptional regulator, LysR family		K0038_00064	K03566			K0038_00066		Methyltransferase domain	1.10E-132	479.2	Pseudomonas syringae group		0					S
	K0038_00065	methyl-accepting chemotaxis protein		K0038_00065	K03406			K0038_00067	yjbB	Na+/Pi-cotransporter	4.80E-275	953.4	Pseudomonas syringae group		3	F:GO:0005315; C:GO:0005886; P:GO:0035435	F:inorganic phosphate transmembrane transporter activity; P:phosphate ion transmembrane transport; C:plasma membrane	K03324		P
	K0038_00066	methyltransferase domain-containing protein		K0038_00066				K0038_00068		Peptidase, M16	8.30E-249	865.9	Pseudomonas syringae group		0			K07263		S
	K0038_00067	membrane protein		K0038_00067	K03324			K0038_00069		Protein of unknown function (DUF2914)	9.20E-204	716.1	Pseudomonas syringae group		0					S
	K0038_00068	insulinase-like protein		K0038_00068				K0038_00070	spmB	membrane	1.20E-217	762.3	Pseudomonas syringae group		0			K06373,K06374		S
	K0038_00069	membrane protein, putative		K0038_00069				K0038_00071	argH	Argininosuccinate lyase	4.40E-266	923.3	Pseudomonas syringae group	EC:4.3.2.1	3	P:GO:0042450; F:GO:0004056; C:GO:0005737	P:arginine biosynthetic process via ornithine; C:cytoplasm; F:argininosuccinate lyase activity	K01755	map00220,map00250,map01100,map01110,map01130,map01230	E
	K0038_00070	membrane protein, putative		K0038_00070				K0038_00072	algZ	Histidine kinase	3.30E-192	677.6	Pseudomonas syringae group	EC:2.7.13.3	0			K08082	map02020	T
	K0038_00071	argininosuccinate lyase		K0038_00071	K01755			K0038_00073	algR	Alginate biosynthesis regulatory protein AlgR	2.20E-134	485	Pseudomonas syringae group		0			K02477,K08083	map02020	K
	K0038_00072	sensor histidine kinase		K0038_00072	K08082			K0038_00074	hemC	Tetrapolymerization of the monopyrrole PBG into the hydroxymethylbilane pre-uroporphyrinogen in several discrete steps	9.90E-169	599.4	Pseudomonas syringae group	EC:4.2.1.75; EC:2.1.1.107; EC:2.5.1.61	4	P:GO:0006782; P:GO:0018160; F:GO:0004418; C:GO:0005829	P:peptidyl-pyrromethane cofactor linkage; F:hydroxymethylbilane synthase activity; P:protoporphyrinogen IX biosynthetic process; C:cytosol	K01749,K13542	map00860,map01100,map01110,map01120	H
	K0038_00073	chemotaxis protein CheY		K0038_00073	K08083			K0038_00075	hemD	uroporphyrinogen-III	3.40E-130	471.1	Pseudomonas syringae group	EC:4.2.1.75; EC:2.1.1.107; EC:2.5.1.61	2	P:GO:0006782; F:GO:0004852	F:uroporphyrinogen-III synthase activity; P:protoporphyrinogen IX biosynthetic process	K01719,K01749,K02496,K13542,K13543	map00860,map01100,map01110,map01120	H
	K0038_00074	porphobilinogen deaminase		K0038_00074	K01749			K0038_00076	hemX	Uroporphyrin-III C-methyltransferase	2.80E-194	684.5	Pseudomonas syringae group	EC:4.2.1.75; EC:2.1.1.107	0			K02496,K06313,K13543	map00860,map01100,map01110,map01120	H
	K0038_00075	uroporphyrinogen-III synthetase		K0038_00075	K01719			K0038_00077	hemY	HemY protein N-terminus	3.50E-214	750.7	Pseudomonas syringae group		0			K02498		H
	K0038_00076	hypothetical protein		K0038_00076	K02496			K0038_00078	dsbB	Required for disulfide bond formation in some periplasmic proteins. Acts by oxidizing the DsbA protein	2.40E-79	301.6	Pseudomonas syringae group		0			K03611		C
	K0038_00077	heme biosynthesis protein HemY		K0038_00077	K02498			K0038_00079	rsd	Belongs to the Rsd AlgQ family	1.80E-86	325.1	Pseudomonas syringae group		2	F:GO:0016989; P:GO:1903506	F:sigma factor antagonist activity; P:regulation of nucleic acid-templated transcription	K07740		K
	K0038_00078	disulfide bond formation protein B		K0038_00078	K03611			K0038_00080	fkl	Peptidyl-prolyl cis-trans	9.40E-121	439.5	Pseudomonas syringae group	EC:5.2.1.8	0			K01802,K03773		M
	K0038_00079	Regulator of RNA polymerase sigma(70) subunit, Rsd/AlgQ		K0038_00079	K07740			K0038_00081	algP	transcriptional regulator	6.20E-65	254.6	Pseudomonas syringae group		0					S
	K0038_00080	FKBP-type peptidyl-prolyl cis-trans isomerase		K0038_00080	K01802			K0038_00082		Protein of unknown function (DUF2390)	1.60E-77	295.4	Pseudomonas syringae group		0					S
	K0038_00081	aliginate regulatory protein AlgR3		K0038_00081				K0038_00083	yheS	ABC transporter, ATP-binding protein	1.00E-308	1065.4	Pseudomonas syringae group		1	F:GO:0005524	F:ATP binding	K06158		S
	K0038_00082	TIGR02444 family protein		K0038_00082				K0038_00084		Mechanosensitive ion channel	6.20E-100	370.2	Pseudomonas syringae group		0					M
	K0038_00083	ABC transporter, ATP-binding protein		K0038_00083	K06158			K0038_00085	rhtB	LysE type translocator	4.90E-103	380.6	Pseudomonas syringae group		0			K05834		E
	K0038_00084	membrane protein		K0038_00084				K0038_00086	pbrT	Iron permease FTR1 family	0.00E0	1133.2	Pseudomonas syringae group		0			K07243		P
	K0038_00085	lysine exporter protein LysE/YggA		K0038_00085	K05834			K0038_00087			2.20E-21	107.8	Pseudomonas syringae group		0
	K0038_00086	cystathionine gamma-synthase		K0038_00086	K07243			K0038_00088			1.60E-9	68.9	Pseudomonas syringae group		0
	K0038_00087	hypothetical protein		K0038_00087				K0038_00089	yheV	Probable metal-binding protein (DUF2387)	1.20E-48	198.7	Pseudomonas syringae group		0			K07070		S
	K0038_00088	Hypothetical protein		K0038_00088				K0038_00090	prlC	Peptidase family M3	0.00E0	1341.6	Pseudomonas syringae group	EC:3.4.24.70	0			K01414		E
	K0038_00089	YheV family putative metal-binding protein		K0038_00089	K07070			K0038_00091	yrdA	Bacterial transferase hexapeptide (six repeats)	5.90E-81	307	Pseudomonas syringae group		4	F:GO:0042802; F:GO:0008270; P:GO:0070207; C:GO:0005829	P:protein homotrimerization; F:identical protein binding; F:zinc ion binding; C:cytosol	K08699		S
	K0038_00090	Oligopeptidase A		K0038_00090	K01414			K0038_00092		Putative aminopeptidase	1.40E-187	662.1	Pseudomonas syringae group		0					S
	K0038_00091	gamma carbonic anhydrase family protein		K0038_00091				K0038_00094		Oligopeptide transporter, OPT family	1.00E-307	1062	Pseudomonas syringae group		0					S
	K0038_00092	aminopeptidase		K0038_00092				K0038_00095			9.80E-68	262.7	Pseudomonas syringae group		0
	K0038_00093	hypothetical protein		K0038_00093				K0038_00096		Protein of unknown function (DUF1161)	4.30E-33	146.7	Pseudomonas syringae group		0					S
	K0038_00094	oligopeptide transporter, OPT family		K0038_00094				K0038_00097	osmC	OsmC-like protein	7.00E-69	266.5	Pseudomonas syringae group		0			K04063		O
	K0038_00095	lipoprotein, putative		K0038_00095				K0038_00098	yvbT	Luciferase-like monooxygenase	1.30E-187	662.1	Pseudomonas syringae group		1	C:GO:0005829	C:cytosol			C
	K0038_00096	hypothetical protein		K0038_00096				K0038_00099		Protein of unknown function (DUF1161)	1.00E-31	142.1	Pseudomonas syringae group		0					S
	K0038_00097	hydroperoxide resistance protein OsmC		K0038_00097	K04063			K0038_00100		Dodecin	3.40E-32	143.7	Pseudomonas syringae group		0			K09165		S
	K0038_00098	bacterial luciferase family protein		K0038_00098				K0038_00101	elaB	Bacterial protein of unknown function (DUF883)	5.90E-44	183.3	Pseudomonas syringae group		5	C:GO:0005887; C:GO:0060187; F:GO:0043024; P:GO:0006974; C:GO:0005829	C:cell pole; C:integral component of plasma membrane; P:cellular response to DNA damage stimulus; F:ribosomal small subunit binding; C:cytosol	K05594,K07184		S
	K0038_00099	hypothetical protein		K0038_00099				K0038_00102	trpI	Transcriptional regulator	1.00E-162	579.3	Pseudomonas syringae group		0			K03566	map02026	K
	K0038_00100	dodecin flavoprotein		K0038_00100	K09165			K0038_00103	trpB	The beta subunit is responsible for the synthesis of L- tryptophan from indole and L-serine	3.80E-237	827	Pseudomonas syringae group	EC:4.2.1.20	2	P:GO:0000162; C:GO:0005737	C:cytoplasm; P:tryptophan biosynthetic process	K01696	map00260,map00400,map01100,map01110,map01130,map01230	E
	K0038_00101	hypothetical protein		K0038_00101				K0038_00104	trpA	The alpha subunit is responsible for the aldol cleavage of indoleglycerol phosphate to indole and glyceraldehyde 3- phosphate	2.30E-142	511.5	Pseudomonas syringae group	EC:4.2.1.20	0			K01695	map00260,map00400,map01100,map01110,map01130,map01230	E
	K0038_00102	regulatory protein, LysR:LysR, substrate-binding protein		K0038_00102				K0038_00105		Nickel/cobalt transporter regulator	6.70E-50	203.8	Pseudomonas syringae group		0					S
	K0038_00103	tryptophan synthase, beta subunit		K0038_00103	K01696			K0038_00106	pcaD	alpha/beta hydrolase fold	5.30E-150	537	Pseudomonas syringae group		0					S
	K0038_00104	tryptophan synthase subunit alpha		K0038_00104	K01695			K0038_00107	lysR1	Transcriptional regulator	2.40E-178	631.3	Pseudomonas syringae group		0					K
	K0038_00105	CigR		K0038_00105				K0038_00108	betC	Choline sulfatase enzyme C terminal	3.30E-291	1006.9	Pseudomonas syringae group	EC:3.1.6.6	0			K01133		P
	K0038_00106	3-oxoadipate enol-lactone hydrolase family protein		K0038_00106	K01055			K0038_00109	proX	Glycine betaine family, ABC transporter substrate-binding protein	2.80E-168	597.8	Pseudomonas syringae group		0			K02001,K02002	map02010	E
	K0038_00107	transcriptional regulator, LysR family		K0038_00107				K0038_00110	sulP2	Sulfate permease family	3.70E-269	933.7	Pseudomonas syringae group		0			K03321		P
	K0038_00108	sulfatase family protein		K0038_00108	K01133			K0038_00111	aroE	Involved in the biosynthesis of the chorismate, which leads to the biosynthesis of aromatic amino acids. Catalyzes the reversible NADPH linked reduction of 3-dehydroshikimate (DHSA) to yield shikimate (SA)	7.90E-146	523.1	Pseudomonas syringae group	EC:1.1.1.25	5	P:GO:0019632; F:GO:0050661; P:GO:0009423; F:GO:0004764; C:GO:0005829	P:chorismate biosynthetic process; F:NADP binding; F:shikimate 3-dehydrogenase (NADP+) activity; P:shikimate metabolic process; C:cytosol	K00014	map00400,map01100,map01110,map01130,map01230	E
	K0038_00109	glycine/betaine family, ABC transporter, substrate-binding protein		K0038_00109	K02002			K0038_00112	hemF	Involved in the heme biosynthesis. Catalyzes the aerobic oxidative decarboxylation of propionate groups of rings A and B of coproporphyrinogen-III to yield the vinyl groups in protoporphyrinogen-IX	3.10E-183	647.5	Pseudomonas syringae group	EC:1.3.3.3	6	F:GO:0046906; F:GO:0042803; P:GO:0006782; F:GO:0030145; C:GO:0005737; F:GO:0004109	F:protein homodimerization activity; F:coproporphyrinogen oxidase activity; C:cytoplasm; P:protoporphyrinogen IX biosynthetic process; F:tetrapyrrole binding; F:manganese ion binding	K00228	map00860,map01100,map01110	H
	K0038_00110	SulP family inorganic anion transporter		K0038_00110	K03321			K0038_00113	qor	COG0604 NADPH quinone reductase and related Zn-dependent oxidoreductases	5.10E-176	623.6	Pseudomonas syringae group	EC:1.6.5.5	5	F:GO:0035925; P:GO:0034599; F:GO:0003960; P:GO:0008152; C:GO:0005829	F:NADPH:quinone reductase activity; F:mRNA 3'-UTR AU-rich region binding; P:cellular response to oxidative stress; P:metabolic process; C:cytosol	K00344		C
	K0038_00111	shikimate 5-dehydrogenase		K0038_00111	K00014			K0038_00114	tsaC	Required for the formation of a threonylcarbamoyl group on adenosine at position 37 (t(6)A37) in tRNAs that read codons beginning with adenine. Catalyzes the conversion of L-threonine, HCO(3)(-) CO(2) and ATP to give threonylcarbamoyl-AMP (TC-AMP) as the acyladenylate intermediate, with the release of diphosphate	4.70E-102	377.1	Pseudomonas syringae group	EC:2.7.7.87	7	P:GO:0002949; F:GO:0005524; F:GO:0000049; F:GO:0061710; P:GO:0006450; F:GO:0003725; C:GO:0005829	P:regulation of translational fidelity; F:L-threonylcarbamoyladenylate synthase; F:double-stranded RNA binding; P:tRNA threonylcarbamoyladenosine modification; F:ATP binding; F:tRNA binding; C:cytosol	K07479,K07566		J
	K0038_00112	coproporphyrinogen III oxidase		K0038_00112	K00228			K0038_00115	dprA	DNA processing protein DprA	2.70E-197	694.5	Pseudomonas syringae group		0			K04096		LU
	K0038_00113	quinone oxidoreductase		K0038_00113	K00344			K0038_00116	lysM	Lysin motif	4.80E-185	653.7	Pseudomonas syringae group		0					S
	K0038_00114	SUA5/yciO/yrdC family domain protein		K0038_00114	K07566			K0038_00117	def	Removes the formyl group from the N-terminal Met of newly synthesized proteins. Requires at least a dipeptide for an efficient rate of reaction. N-terminal L-methionine is a prerequisite for activity but the enzyme has broad specificity at other positions	1.40E-89	335.5	Pseudomonas syringae group	EC:3.5.1.88	9	P:GO:0043686; P:GO:0031365; F:GO:0008270; F:GO:0042586; F:GO:0008198; P:GO:0018206; F:GO:0008463; F:GO:0043022; C:GO:0005829	F:ferrous iron binding; F:formylmethionine deformylase activity; F:ribosome binding; F:peptide deformylase activity; P:co-translational protein modification; F:zinc ion binding; P:N-terminal protein amino acid modification; C:cytosol; P:peptidyl-methionine modification	K01462		J
	K0038_00115	DNA processing protein DprA, putative		K0038_00115	K04096			K0038_00118	fmt	Attaches a formyl group to the free amino group of methionyl-tRNA(fMet). The formyl group appears to play a dual role in the initiator identity of N-formylmethionyl-tRNA by promoting its recognition by IF2 and preventing the misappropriation of this tRNA by the elongation apparatus	5.60E-172	610.1	Pseudomonas syringae group	EC:2.1.1.176; EC:2.1.2.9	6	F:GO:0004479; P:GO:0006431; P:GO:0071951; P:GO:0006413; C:GO:0005829; P:GO:0040007	P:methionyl-tRNA aminoacylation; F:methionyl-tRNA formyltransferase activity; P:growth; P:translational initiation; C:cytosol; P:conversion of methionyl-tRNA to N-formyl-methionyl-tRNA	K00604,K03500	map00670,map00970	J
	K0038_00116	LysM peptidoglycan-binding domain-containing protein		K0038_00116				K0038_00119	sun	Specifically methylates the cytosine at position 967 (m5C967) of 16S rRNA	5.70E-247	859.8	Pseudomonas syringae group	EC:2.1.1.176	3	F:GO:0009383; P:GO:0070475; C:GO:0005829	P:rRNA base methylation; F:rRNA (cytosine-C5-)-methyltransferase activity; C:cytosol	K03500		J
	K0038_00117	polypeptide deformylase		K0038_00117	K01462			K0038_00120	trkA	Potassium	1.30E-246	858.6	Pseudomonas syringae group		4	C:GO:0016020; F:GO:0008324; P:GO:0006813; P:GO:0098662	C:membrane; P:potassium ion transport; F:cation transmembrane transporter activity; P:inorganic cation transmembrane transport	K03499,K05571		P
	K0038_00118	methionyl-tRNA formyltransferase		K0038_00118	K00604			K0038_00121		Oxidoreductase, alpha (Molybdopterin) subunit, fusion	0.00E0	1549.6	Pseudomonas syringae group		0					C
	K0038_00119	sun protein		K0038_00119	K03500			K0038_00122	htrB	Acyltransferase	3.60E-168	597.4	Pseudomonas syringae group	EC:2.3.1.241	0			K02517	map00540,map01100	M
	K0038_00120	Trk system potassium uptake protein trkA		K0038_00120	K03499			K0038_00123	tag	Methyladenine glycosylase	2.00E-100	371.7	Pseudomonas syringae group	EC:3.2.2.20	0			K01246	map03410	L
	K0038_00121	molybdopterin oxidoreductase, alpha subunit		K0038_00121				K0038_00124	glyQ	Glycyl-tRNA synthetase, alpha subunit	2.90E-184	651	Pseudomonas syringae group	EC:6.1.1.14	3	F:GO:0004820; F:GO:0046983; C:GO:0005829	F:glycine-tRNA ligase activity; F:protein dimerization activity; C:cytosol	K01878,K14164	map00970	J
	K0038_00122	lipid A biosynthesis lauroyl acyltransferase, putative		K0038_00122	K02517			K0038_00125	glyS	Glycyl-tRNA synthetase beta subunit	0.00E0	1309.7	Pseudomonas syringae group	EC:6.1.1.14	4	F:GO:0004820; F:GO:0046983; P:GO:0006426; C:GO:0005829	F:glycine-tRNA ligase activity; P:glycyl-tRNA aminoacylation; F:protein dimerization activity; C:cytosol	K01879,K14164	map00970	J
	K0038_00123	DNA-3-methyladenine glycosidase I		K0038_00123	K01246			K0038_00126	gmhB	D,D-heptose 1,7-bisphosphate phosphatase	2.70E-97	361.3	Pseudomonas syringae group	EC:3.1.3.83; EC:3.1.3.82	4	F:GO:0000287; P:GO:0016311; F:GO:0008270; F:GO:0034200	F:magnesium ion binding; P:dephosphorylation; F:zinc ion binding; F:D,D-heptose 1,7-bisphosphate phosphatase activity	K03273	map00540,map01100	E
	K0038_00124	glycyl-tRNA synthetase		K0038_00124	K01878			K0038_00127	plsC	Phosphate acyltransferases	2.40E-144	518.1	Pseudomonas syringae group	EC:2.3.1.51	0			K00655	map00561,map00564,map01100,map01110	I
	K0038_00125	glycyl-tRNA synthetase, beta subunit		K0038_00125	K01879			K0038_00128	gyrB	A type II topoisomerase that negatively supercoils closed circular double-stranded (ds) DNA in an ATP-dependent manner to modulate DNA topology and maintain chromosomes in an underwound state. Negative supercoiling favors strand separation, and DNA replication, transcription, recombination and repair, all of which involve strand separation. Also able to catalyze the interconversion of other topol…	0.00E0	1595.5	Pseudomonas syringae group	EC:5.99.1.3	11	F:GO:0016887; F:GO:0005524; F:GO:0003677; P:GO:0007059; P:GO:0006265; P:GO:0009410; P:GO:0006351; C:GO:0009295; F:GO:0034335; C:GO:0009330; C:GO:0005829	P:transcription, DNA-templated; F:DNA negative supercoiling activity; P:response to xenobiotic stimulus; C:DNA topoisomerase type II (double strand cut, ATP-hydrolyzing) complex; F:ATP hydrolysis activity; C:nucleoid; P:DNA topological change; P:chromosome segregation; F:ATP binding; F:DNA binding; C:cytosol	K02470		L
	K0038_00126	D-glycero-beta-D-manno-heptose 1,7-bisphosphate 7-phosphatase		K0038_00126	K03273			K0038_00129	recF	it is required for DNA replication and normal SOS inducibility. RecF binds preferentially to single-stranded, linear DNA. It also seems to bind ATP	1.30E-207	728.8	Gammaproteobacteria		8	P:GO:0006302; P:GO:0009411; P:GO:0009432; C:GO:0005886; F:GO:0003697; P:GO:0006260; P:GO:0000731; C:GO:0005829	P:response to UV; F:single-stranded DNA binding; P:DNA synthesis involved in DNA repair; P:SOS response; P:DNA replication; P:double-strand break repair; C:cytosol; C:plasma membrane	K03629	map03440	L
	K0038_00127	hdtS protein		K0038_00127	K00655			K0038_00130	dnaN	Confers DNA tethering and processivity to DNA polymerases and other proteins. Acts as a clamp, forming a ring around DNA (a reaction catalyzed by the clamp-loading complex) which diffuses in an ATP-independent manner freely and bidirectionally along dsDNA. Initially characterized for its ability to contact the catalytic subunit of DNA polymerase III (Pol III), a complex, multichain enzyme respons…	1.40E-193	682.2	Pseudomonas syringae group	EC:2.7.7.7	7	F:GO:0003887; F:GO:0042802; P:GO:0071897; P:GO:0006271; C:GO:0009360; P:GO:0006974; C:GO:0005829	F:DNA-directed DNA polymerase activity; P:DNA biosynthetic process; C:DNA polymerase III complex; P:cellular response to DNA damage stimulus; F:identical protein binding; P:DNA strand elongation involved in DNA replication; C:cytosol	K02338	map00230,map00240,map01100,map03030,map03430,map03440	L
	K0038_00128	DNA gyrase subunit B		K0038_00128	K02470			K0038_00131	dnaA	it binds specifically double-stranded DNA at a 9 bp consensus (dnaA box) 5'-TTATC CA A CA A-3'. DnaA binds to ATP and to acidic phospholipids	9.60E-262	909.1	Pseudomonas syringae group		8	F:GO:0003688; F:GO:0005524; F:GO:0042802; P:GO:0051052; P:GO:0006275; C:GO:0005886; P:GO:0006270; C:GO:0005829	P:regulation of DNA metabolic process; F:identical protein binding; F:DNA replication origin binding; P:DNA replication initiation; F:ATP binding; C:cytosol; P:regulation of DNA replication; C:plasma membrane	K02313	map02020,map04112	L
	K0038_00129	DNA replication and repair protein RecF		K0038_00129	K03629			K0038_00132	rpmH	Belongs to the bacterial ribosomal protein bL34 family	7.50E-14	82	Pseudomonas putida group		3	P:GO:0006412; C:GO:0022625; F:GO:0003735	F:structural constituent of ribosome; C:cytosolic large ribosomal subunit; P:translation	K02914	map03010	J
	K0038_00130	DNA polymerase III, beta subunit		K0038_00130	K02338			K0038_00133	rnpA	RNaseP catalyzes the removal of the 5'-leader sequence from pre-tRNA to produce the mature 5'-terminus. It can also cleave other RNA substrates such as 4.5S RNA. The protein component plays an auxiliary but essential role in vivo by binding to the 5'-leader sequence and broadening the substrate specificity of the ribozyme	4.10E-72	277.3	Gammaproteobacteria	EC:3.1.26.5	11	F:GO:0031404; P:GO:0034414; F:GO:0004526; P:GO:0001682; F:GO:0042301; C:GO:0005655; F:GO:0033204; F:GO:0042781; F:GO:0043199; C:GO:1905348; P:GO:0040007	P:tRNA 5'-leader removal; F:ribonuclease P RNA binding; P:growth; F:chloride ion binding; F:3'-tRNA processing endoribonuclease activity; C:nucleolar ribonuclease P complex; P:tRNA 3'-trailer cleavage, endonucleolytic; C:endonuclease complex; F:sulfate binding; F:ribonuclease P activity; F:phosphate ion binding	K03536,K08998		J
	K0038_00131	Chromosomal replication initiator protein DnaA		K0038_00131	K02313			K0038_00134	yidC	Required for the insertion and or proper folding and or complex formation of integral membrane proteins into the membrane. Involved in integration of membrane proteins that insert both dependently and independently of the Sec translocase complex, as well as at least some lipoproteins. Aids folding of multispanning membrane proteins	1.30E-299	1035	Pseudomonas syringae group		8	P:GO:0002790; F:GO:0032977; P:GO:0051260; F:GO:0005215; C:GO:0005887; P:GO:0051205; P:GO:0006457; P:GO:0009306	P:protein secretion; C:integral component of plasma membrane; P:protein homooligomerization; P:peptide secretion; F:membrane insertase activity; P:protein folding; P:protein insertion into membrane; F:transporter activity	K03217	map02024,map03060,map03070	U
	K0038_00132	50S ribosomal protein L34		K0038_00132	K02914			K0038_00135	mnmE	Exhibits a very high intrinsic GTPase hydrolysis rate. Involved in the addition of a carboxymethylaminomethyl (cmnm) group at the wobble position (U34) of certain tRNAs, forming tRNA- cmnm(5)s(2)U34	6.10E-244	849.7	Pseudomonas syringae group		13	F:GO:0005525; P:GO:0002098; P:GO:0030488; F:GO:0030955; P:GO:0009268; F:GO:0019003; F:GO:0032550; F:GO:0003924; P:GO:0009636; F:GO:0042802; P:GO:0061077; C:GO:0005886; C:GO:0005829	P:response to pH; P:response to toxic substance; P:chaperone-mediated protein folding; C:plasma membrane; C:cytosol; P:tRNA methylation; F:potassium ion binding; F:GDP binding; F:purine ribonucleoside binding; F:identical protein binding; P:tRNA wobble uridine modification; F:GTP binding; F:GTPase activity	K03650		J
	K0038_00133	Ribonuclease P protein component		K0038_00133	K03536			K0038_00136	gidA	NAD-binding protein involved in the addition of a carboxymethylaminomethyl (cmnm) group at the wobble position (U34) of certain tRNAs, forming tRNA-cmnm(5)s(2)U34	0.00E0	1256.5	Pseudomonas syringae group		5	P:GO:0002098; P:GO:0030488; P:GO:0009411; F:GO:0050660; C:GO:0005829	P:tRNA methylation; F:flavin adenine dinucleotide binding; P:response to UV; P:tRNA wobble uridine modification; C:cytosol	K03495		D
	K0038_00134	inner membrane protein, 60 kDa		K0038_00134	K03217			K0038_00137	rsmG	Specifically methylates the N7 position of guanine in position 527 of 16S rRNA	1.90E-115	421.8	Pseudomonas syringae group	EC:2.1.1.170	3	P:GO:0070476; F:GO:0070043; C:GO:0005829	F:rRNA (guanine-N7-)-methyltransferase activity; P:rRNA (guanine-N7)-methylation; C:cytosol	K03501		J
	K0038_00135	tRNA modification GTPase TrmE		K0038_00135	K03650			K0038_00138	parA	Chromosome partitioning	5.40E-144	516.9	Pseudomonas syringae group		0			K03496		D
	K0038_00136	tRNA-5-carboxymethylaminomethyl-2- thiouridine(34) synthesis protein MnmG		K0038_00136	K03495			K0038_00139	parB	Belongs to the ParB family	4.10E-153	547.4	Pseudomonas syringae group		0			K03497		K
	K0038_00137	16S rRNA m(7)G-527 methyltransferase		K0038_00137	K03501			K0038_00140	atpI	ATP synthase	4.00E-66	257.3	Pseudomonas syringae group		8	F:GO:0016887; F:GO:0044769; P:GO:0009168; C:GO:0005886; F:GO:0046933; P:GO:0006805; F:GO:0019829; P:GO:0015986	F:ATPase-coupled cation transmembrane transporter activity; F:ATP hydrolysis activity; F:proton-transporting ATP synthase activity, rotational mechanism; P:ATP synthesis coupled proton transport; F:ATPase activity, coupled to transmembrane movement of ions, rotational mechanism; P:purine ribonucleoside monophosphate biosynthetic process; P:xenobiotic metabolic process; C:plasma membrane	K02116		C
	K0038_00138	putative chromosome partitioning protein		K0038_00138	K03496			K0038_00141	atpB	it plays a direct role in the translocation of protons across the membrane	9.50E-158	562.8	Pseudomonas syringae group		9	F:GO:0016887; F:GO:0044769; P:GO:0009168; C:GO:0005887; F:GO:0046933; P:GO:0006805; F:GO:0019829; C:GO:0045264; P:GO:0042777	C:integral component of plasma membrane; C:plasma membrane proton-transporting ATP synthase complex, coupling factor F(o); F:ATPase-coupled cation transmembrane transporter activity; F:ATP hydrolysis activity; F:proton-transporting ATP synthase activity, rotational mechanism; F:ATPase activity, coupled to transmembrane movement of ions, rotational mechanism; P:purine ribonucleoside monophosphate …	K02108	map00190,map00195,map01100	C
	K0038_00139	chromosome partitioning protein ParB		K0038_00139	K03497			K0038_00142	atpE	F(1)F(0) ATP synthase produces ATP from ADP in the presence of a proton or sodium gradient. F-type ATPases consist of two structural domains, F(1) containing the extramembraneous catalytic core and F(0) containing the membrane proton channel, linked together by a central stalk and a peripheral stalk. During catalysis, ATP synthesis in the catalytic domain of F(1) is coupled via a rotary mechanism…	2.30E-35	154.5	Gammaproteobacteria		9	F:GO:0016887; C:GO:0016021; P:GO:0009168; F:GO:0046933; P:GO:0006805; F:GO:0046961; F:GO:0008553; C:GO:0045264; P:GO:0015986	C:plasma membrane proton-transporting ATP synthase complex, coupling factor F(o); F:ATP hydrolysis activity; F:proton-transporting ATP synthase activity, rotational mechanism; C:integral component of membrane; P:ATP synthesis coupled proton transport; F:P-type proton-exporting transporter activity; P:purine ribonucleoside monophosphate biosynthetic process; P:xenobiotic metabolic process; F:proto…	K02110	map00190,map00195,map01100	C
	K0038_00140	F0F1 ATP synthase subunit I		K0038_00140	K02116			K0038_00143	atpF	Component of the F(0) channel, it forms part of the peripheral stalk, linking F(1) to F(0)	5.30E-38	164.1	Pseudomonas syringae group		9	F:GO:0016887; P:GO:0009168; C:GO:0031225; F:GO:0046933; P:GO:0006805; F:GO:0046961; F:GO:0008553; C:GO:0045264; P:GO:0015986	C:anchored component of membrane; C:plasma membrane proton-transporting ATP synthase complex, coupling factor F(o); F:ATP hydrolysis activity; F:proton-transporting ATP synthase activity, rotational mechanism; P:ATP synthesis coupled proton transport; F:P-type proton-exporting transporter activity; P:purine ribonucleoside monophosphate biosynthetic process; P:xenobiotic metabolic process; F:proto…	K02109	map00190,map00195,map01100	C
	K0038_00141	ATP synthase F0, A subunit		K0038_00141	K02108			K0038_00144	atpH	F(1)F(0) ATP synthase produces ATP from ADP in the presence of a proton or sodium gradient. F-type ATPases consist of two structural domains, F(1) containing the extramembraneous catalytic core and F(0) containing the membrane proton channel, linked together by a central stalk and a peripheral stalk. During catalysis, ATP synthesis in the catalytic domain of F(1) is coupled via a rotary mechanism…	1.70E-88	332	Pseudomonas syringae group		8	F:GO:0016887; P:GO:0009168; F:GO:0046933; P:GO:0006805; C:GO:0045262; F:GO:0046961; F:GO:0008553; P:GO:0015986	C:plasma membrane proton-transporting ATP synthase complex, catalytic core F(1); F:ATP hydrolysis activity; F:proton-transporting ATP synthase activity, rotational mechanism; P:ATP synthesis coupled proton transport; F:P-type proton-exporting transporter activity; P:purine ribonucleoside monophosphate biosynthetic process; P:xenobiotic metabolic process; F:proton-transporting ATPase activity, rot…	K02113	map00190,map00195,map01100	C
	K0038_00142	ATP synthase subunit c		K0038_00142	K02110			K0038_00145	atpA	Produces ATP from ADP in the presence of a proton gradient across the membrane. The alpha chain is a regulatory subunit	1.60E-285	988	Pseudomonas syringae group	EC:3.6.3.14	10	F:GO:0016887; F:GO:0044769; P:GO:0009168; F:GO:0046933; P:GO:0006805; C:GO:0045262; F:GO:0019829; C:GO:0005618; P:GO:0040007; P:GO:0015986	C:plasma membrane proton-transporting ATP synthase complex, catalytic core F(1); C:cell wall; P:growth; F:ATPase-coupled cation transmembrane transporter activity; F:ATP hydrolysis activity; F:proton-transporting ATP synthase activity, rotational mechanism; P:ATP synthesis coupled proton transport; F:ATPase activity, coupled to transmembrane movement of ions, rotational mechanism; P:purine ribonu…	K02111	map00190,map00195,map01100	F
	K0038_00143	ATP synthase F0, B subunit		K0038_00143	K02109			K0038_00146	atpG	Produces ATP from ADP in the presence of a proton gradient across the membrane. The gamma chain is believed to be important in regulating ATPase activity and the flow of protons through the CF(0) complex	3.50E-152	544.3	Pseudomonas syringae group		10	F:GO:0016887; P:GO:0009168; F:GO:0046933; P:GO:0006805; C:GO:0045262; F:GO:0046961; F:GO:0008553; C:GO:0005618; P:GO:0040007; P:GO:0015986	C:plasma membrane proton-transporting ATP synthase complex, catalytic core F(1); C:cell wall; P:growth; F:ATP hydrolysis activity; F:proton-transporting ATP synthase activity, rotational mechanism; P:ATP synthesis coupled proton transport; F:P-type proton-exporting transporter activity; P:purine ribonucleoside monophosphate biosynthetic process; P:xenobiotic metabolic process; F:proton-transporti…	K02115	map00190,map00195,map01100	C
	K0038_00144	ATP synthase F1, delta subunit		K0038_00144	K02113			K0038_00147	atpD	Produces ATP from ADP in the presence of a proton gradient across the membrane. The catalytic sites are hosted primarily by the beta subunits	6.10E-260	902.9	Pseudomonas syringae group	EC:3.6.3.14	8	F:GO:0016887; P:GO:0009168; F:GO:0046933; P:GO:0006805; C:GO:0045262; F:GO:0046961; F:GO:0008553; P:GO:0015986	C:plasma membrane proton-transporting ATP synthase complex, catalytic core F(1); F:ATP hydrolysis activity; F:proton-transporting ATP synthase activity, rotational mechanism; P:ATP synthesis coupled proton transport; F:P-type proton-exporting transporter activity; P:purine ribonucleoside monophosphate biosynthetic process; P:xenobiotic metabolic process; F:proton-transporting ATPase activity, rot…	K02112	map00190,map00195,map01100	F
	K0038_00145	ATP synthase alpha chain		K0038_00145	K02111			K0038_00148	atpC	Produces ATP from ADP in the presence of a proton gradient across the membrane	4.00E-69	267.3	Pseudomonas syringae group		8	F:GO:0016887; F:GO:0044769; P:GO:0009168; F:GO:0046933; P:GO:0006805; C:GO:0045262; F:GO:0019829; P:GO:0015986	C:plasma membrane proton-transporting ATP synthase complex, catalytic core F(1); F:ATPase-coupled cation transmembrane transporter activity; F:ATP hydrolysis activity; F:proton-transporting ATP synthase activity, rotational mechanism; P:ATP synthesis coupled proton transport; F:ATPase activity, coupled to transmembrane movement of ions, rotational mechanism; P:purine ribonucleoside monophosphate …	K02114	map00190,map00195,map01100	C
	K0038_00146	F0F1 ATP synthase subunit gamma		K0038_00146	K02115			K0038_00149	glmU	Catalyzes the last two sequential reactions in the de novo biosynthetic pathway for UDP-N-acetylglucosamine (UDP- GlcNAc). The C-terminal domain catalyzes the transfer of acetyl group from acetyl coenzyme A to glucosamine-1-phosphate (GlcN-1-P) to produce N-acetylglucosamine-1-phosphate (GlcNAc-1-P), which is converted into UDP-GlcNAc by the transfer of uridine 5- monophosphate (from uridine 5-tr…	7.30E-202	709.9	Gammaproteobacteria	EC:2.7.7.23; EC:2.3.1.157	8	F:GO:0000287; P:GO:0006048; F:GO:0042802; P:GO:0009103; P:GO:0009252; F:GO:0019134; F:GO:0003977; C:GO:0005829	F:UDP-N-acetylglucosamine diphosphorylase activity; F:magnesium ion binding; F:identical protein binding; F:glucosamine-1-phosphate N-acetyltransferase activity; P:UDP-N-acetylglucosamine biosynthetic process; P:peptidoglycan biosynthetic process; C:cytosol; P:lipopolysaccharide biosynthetic process	K04042	map00520,map01100,map01130	M
	K0038_00147	ATP synthase F1, beta subunit		K0038_00147	K02112			K0038_00150	glmR	transcriptional	1.90E-133	481.9	Pseudomonas syringae group		0			K02081		K
	K0038_00148	ATP synthase F0F1 subunit epsilon		K0038_00148	K02114			K0038_00151	glmS	Catalyzes the first step in hexosamine metabolism, converting fructose-6P into glucosamine-6P using glutamine as a nitrogen source	0.00E0	1169.8	Pseudomonas syringae group	EC:2.6.1.16	5	P:GO:0006048; P:GO:0006002; P:GO:0006487; F:GO:0004360; C:GO:0005829	P:UDP-N-acetylglucosamine biosynthetic process; P:protein N-linked glycosylation; F:glutamine-fructose-6-phosphate transaminase (isomerizing) activity; P:fructose 6-phosphate metabolic process; C:cytosol	K00820	map00250,map00520,map01100,map01130,map04931	M
	K0038_00149	UDP-N-acetylglucosamine diphosphorylase/glucosamine-1-phosphate N-acetyltransferase		K0038_00149	K04042			K0038_00152			2.10E-112	412.5	Bacteria		0
	K0038_00150	transcriptional regulator, DeoR family		K0038_00150				K0038_00153		transposase activity	4.10E-186	657.9	Bacteria		0			K07483,K07497		L
	K0038_00151	glucosamine-fructose-6-phosphate aminotransferase		K0038_00151	K00820			K0038_00154			3.50E-53	214.9	Proteobacteria		0
	K0038_00152	TniQ family protein		K0038_00152				K0038_00155		Transposase and inactivated derivatives	0.00E0	1360.9	Proteobacteria		0					L
	K0038_00153	transposase		K0038_00153				K0038_00156		Belongs to the peptidase S16 family	1.60E-172	612.5	Proteobacteria		0					LO
	K0038_00154	transposase		K0038_00154				K0038_00157		DNA helicase	4.20E-137	495	Proteobacteria	EC:3.6.4.12	0			K03657,K07012	map03420,map03430	L
	K0038_00155	transposase		K0038_00155				K0038_00158		ATP-dependent endonuclease of the OLD family	1.20E-199	703	Proteobacteria		0			K07459		L
	K0038_00156	transposase		K0038_00156				K0038_00159	cobB	NAD-dependent lysine deacetylase and desuccinylase that specifically removes acetyl and succinyl groups on target proteins. Modulates the activities of several proteins which are inactive in their acylated form	5.20E-136	490.3	Pseudomonas syringae group		7	F:GO:0003953; P:GO:0071479; F:GO:0034979; P:GO:0006476; P:GO:0070213; C:GO:0005618; P:GO:0006303	P:protein auto-ADP-ribosylation; C:cell wall; P:double-strand break repair via nonhomologous end joining; P:cellular response to ionizing radiation; F:NAD-dependent protein deacetylase activity; P:protein deacetylation; F:NAD+ nucleosidase activity	K12410		K
	K0038_00157	UvrD-helicase domain-containing protein		K0038_00157				K0038_00160			2.50E-35	154.5	Gammaproteobacteria		0
	K0038_00158	AAA family ATPase		K0038_00158				K0038_00161			6.20E-102	378.3	Burkholderiaceae		0
	K0038_00159	NAD-dependent protein deacylase		K0038_00159	K12410			K0038_00162		Permuted papain-like amidase enzyme, YaeF/YiiX, C92 family	4.70E-206	723.8	Gammaproteobacteria		0					S
	K0038_00160	putative uncharacterized protein		K0038_00160				K0038_00164		Acetyltransferase (GNAT) family	1.10E-44	186.8	Pseudomonas syringae group		0					S
	K0038_00161	putative protein		K0038_00161				K0038_00166			5.00E-51	207.2	Gammaproteobacteria		0
	K0038_00162	Permuted papain-like amidase enzyme, YaeF/YiiX, C92 family		K0038_00162				K0038_00167	resA	Type III restriction protein res subunit	3.70E-292	1010.4	Proteobacteria	EC:3.1.21.5	0			K01156		L
	K0038_00163	hypothetical protein		K0038_00163				K0038_00169			9.60E-62	243.4	Proteobacteria		0
	K0038_00164	GNAT family N-acetyltransferase		K0038_00164				K0038_00170		COG2826 Transposase and inactivated derivatives, IS30 family	5.60E-34	149.8	Gammaproteobacteria		0					L
	K0038_00165	hypothetical protein		K0038_00165				K0038_00171		Histidine kinase	2.40E-39	171.4	Myxococcales		0			K03406,K21470	map02020,map02030	T
	K0038_00166	putative protein		K0038_00166				K0038_00172		Response regulator receiver domain	7.30E-19	100.5	Gammaproteobacteria		0					KT
	K0038_00167	helicase		K0038_00167				K0038_00173		Phosphorylase superfamily	1.20E-46	194.1	Pseudoalteromonadaceae		0					F
	K0038_00168	Orf17		K0038_00168				K0038_00174	cobB	NAD-dependent lysine deacetylase and desuccinylase that specifically removes acetyl and succinyl groups on target proteins. Modulates the activities of several proteins which are inactive in their acylated form	1.80E-136	491.9	Pseudomonas syringae group		7	F:GO:0003953; P:GO:0071479; F:GO:0034979; P:GO:0006476; P:GO:0070213; C:GO:0005618; P:GO:0006303	P:protein auto-ADP-ribosylation; C:cell wall; P:double-strand break repair via nonhomologous end joining; P:cellular response to ionizing radiation; F:NAD-dependent protein deacetylase activity; P:protein deacetylation; F:NAD+ nucleosidase activity	K12410		K
	K0038_00169	transcriptional factor		K0038_00169				K0038_00175			2.20E-26	124.4	Pseudomonas syringae group		0
	K0038_00170	IS30 family transposase		K0038_00170				K0038_00176		Protein of unknown function (DUF1652)	8.90E-21	105.9	Pseudomonas syringae group		0					S
	K0038_00171	hypothetical protein		K0038_00171				K0038_00178			3.60E-22	111.7	Alphaproteobacteria		0
	K0038_00172	response regulator		K0038_00172				K0038_00179		Type I restriction-modification system methyltransferase subunit	4.10E-155	555.8	Chromatiales		0					V
	K0038_00173	Nucleoside phosphorylase		K0038_00173				K0038_00180			2.10E-12	79.7	Alphaproteobacteria		0
	K0038_00174	NAD-dependent deacylase		K0038_00174	K12410			K0038_00181		UvrD-like helicase C-terminal domain	0.00E0	1254.2	Pseudomonas syringae group		0					L
	K0038_00175	Prophage PssSM-02, Orf7		K0038_00175				K0038_00182		AAA ATPase domain	5.40E-292	1009.6	Pseudomonas syringae group		0			K07459		DL
	K0038_00176	hypothetical protein		K0038_00176				K0038_00184	vagC	Antidote-toxin recognition MazE, bacterial antitoxin	1.20E-44	186.8	Moraxellaceae		0			K18829		S
	K0038_00177	hypothetical protein		K0038_00177				K0038_00185			2.10E-7	63.2	Pseudomonas aeruginosa group		0
	K0038_00178	MerR family transcriptional regulator		K0038_00178				K0038_00187	comM	Magnesium chelatase, subunit ChlI C-terminal	7.60E-150	536.6	Pseudomonas syringae group		0			K07391		O
	K0038_00179	SAM-dependent DNA methyltransferase		K0038_00179				K0038_00188			0.00E0	1772.7	Pseudomonas syringae group		0
	K0038_00180	hypothetical protein		K0038_00180				K0038_00189			1.20E-84	319.7	Pseudomonas syringae group		0
	K0038_00181	UvrD/REP helicase family protein		K0038_00181				K0038_00190	MA20_25245	Acetyltransferase (GNAT) domain	1.10E-17	96.7	Gammaproteobacteria		0			K09707		K
	K0038_00182	hypothetical protein		K0038_00182	K07459			K0038_00191		KR domain	6.90E-117	426.8	Pseudomonas syringae group		0					S
	K0038_00183	hypothetical protein		K0038_00183				K0038_00192		Transcriptional regulator	9.40E-147	526.6	Pseudomonas syringae group		0					K
	K0038_00184	hypothetical protein		K0038_00184				K0038_00193			1.30E-95	355.9	Pseudomonas syringae group		0
	K0038_00185	putative uncharacterized protein		K0038_00185				K0038_00194	leuD	3-isopropylmalate dehydratase	1.00E-54	219.5	Burkholderiaceae	EC:4.2.1.33; EC:4.2.1.3; EC:4.2.1.35	0			K01681,K01703,K01704,K17749	map00020,map00290,map00400,map00630,map00660,map00720,map00966,map01100,map01110,map01120,map01130,map01200,map01210,map01230	E
	K0038_00186	putative uncharacterized protein		K0038_00186				K0038_00195		Major Facilitator Superfamily	1.70E-192	678.7	Gammaproteobacteria		0					G
	K0038_00187	Mg chelatase-related protein		K0038_00187	K07391			K0038_00196	dgdR	Bacterial regulatory helix-turn-helix protein, lysR family	4.60E-152	543.9	Pseudomonas syringae group		0					K
	K0038_00188	membrane protein		K0038_00188				K0038_00197	yqiC	Membrane fusogenic activity	5.60E-37	159.8	Pseudomonas syringae group		1	C:GO:0005829	C:cytosol	K09806		S
	K0038_00189	permease		K0038_00189				K0038_00199	glnK	Belongs to the P(II) protein family	7.60E-55	219.5	Pseudomonas putida group		0			K04751,K04752	map02020	K
	K0038_00190	GNAT family N-acetyltransferase		K0038_00190				K0038_00200	amtB	Ammonium transporter	1.00E-243	849	Pseudomonas syringae group		0			K03320		P
	K0038_00191	Short-chain dehydrogenase/reductase SDR		K0038_00191				K0038_00201	yjbQ	Uncharacterised protein family UPF0047	5.70E-82	310.1	Pseudomonas syringae group		0					S
	K0038_00192	AraC family transcriptional regulator		K0038_00192				K0038_00202			2.40E-37	161.4	Pseudomonas syringae group		0
	K0038_00193	protein of unknown function		K0038_00193				K0038_00203		HAD-hyrolase-like	8.20E-120	436.4	Pseudomonas syringae group	EC:3.1.3.102; EC:3.1.3.104	0			K20862	map00740,map01100,map01110	S
	K0038_00194	3-isopropylmalate dehydratase		K0038_00194				K0038_00204	xerC	Site-specific tyrosine recombinase, which acts by catalyzing the cutting and rejoining of the recombining DNA molecules. The XerC-XerD complex is essential to convert dimers of the bacterial chromosome into monomers to permit their segregation at cell division. It also contributes to the segregational stability of plasmids	7.30E-158	563.1	Pseudomonas syringae group		9	F:GO:0003677; P:GO:0071139; P:GO:0015074; P:GO:0006276; P:GO:0042150; F:GO:0009037; C:GO:0005737; F:GO:0000150; C:GO:0048476	F:DNA strand exchange activity; C:Holliday junction resolvase complex; P:DNA integration; P:plasmid maintenance; P:plasmid recombination; C:cytoplasm; P:resolution of recombination intermediates; F:DNA binding; F:tyrosine-based site-specific recombinase activity	K03733		L
	K0038_00195	MFS transporter		K0038_00195				K0038_00205	yigA	Protein of unknown function, DUF484	1.90E-127	461.8	Pseudomonas syringae group		0			K09921		S
	K0038_00196	transcriptional regulator		K0038_00196				K0038_00206	dapF	Catalyzes the stereoinversion of LL-2,6- diaminoheptanedioate (L,L-DAP) to meso-diaminoheptanedioate (meso- DAP), a precursor of L-lysine and an essential component of the bacterial peptidoglycan	2.20E-156	558.1	Pseudomonas syringae group	EC:5.1.1.7	3	F:GO:0008837; P:GO:0009089; C:GO:0005829	P:lysine biosynthetic process via diaminopimelate; F:diaminopimelate epimerase activity; C:cytosol	K01778	map00300,map01100,map01110,map01120,map01130,map01230	E
	K0038_00197	hypothetical protein		K0038_00197	K09806			K0038_00207	lysA	Specifically catalyzes the decarboxylation of meso- diaminopimelate (meso-DAP) to L-lysine	4.00E-234	817	Pseudomonas syringae group	EC:2.4.1.129; EC:4.1.1.20; EC:3.4.16.4	2	F:GO:0008836; P:GO:0009089	P:lysine biosynthetic process via diaminopimelate; F:diaminopimelate decarboxylase activity	K01586,K05366	map00300,map00550,map01100,map01110,map01120,map01130,map01230,map01501	E
	K0038_00198	protein of unknown function		K0038_00198				K0038_00208		Prokaryotic lipoprotein-attachment site	4.20E-18	96.3	Pseudomonas syringae group		0					M
	K0038_00199	nitrogen regulatory protein P-II 2		K0038_00199	K04752			K0038_00209	cyaY	Belongs to the frataxin family	1.50E-50	205.3	Pseudomonas syringae group	EC:1.16.3.1	9	P:GO:0034599; F:GO:0004322; F:GO:0051537; F:GO:0034986; P:GO:0006879; P:GO:0018283; F:GO:0008198; F:GO:0008199; C:GO:0005829	P:iron incorporation into metallo-sulfur cluster; F:ferric iron binding; F:ferrous iron binding; F:ferroxidase activity; P:cellular response to oxidative stress; P:cellular iron ion homeostasis; F:iron chaperone activity; F:2 iron, 2 sulfur cluster binding; C:cytosol	K06202,K19054	map00860	P
	K0038_00200	ammonium transporter		K0038_00200	K03320			K0038_00211	rnk	Nucleoside diphosphate kinase	2.80E-67	261.2	Pseudomonas syringae group		0			K03624,K06140		K
	K0038_00201	Putative secondary thiamine-phosphate synthase enzyme		K0038_00201				K0038_00212	cyaA	Adenylate cyclase	0.00E0	1841.2	Pseudomonas syringae group	EC:4.6.1.1	3	F:GO:0004016; P:GO:0006171; C:GO:0005737	P:cAMP biosynthetic process; C:cytoplasm; F:adenylate cyclase activity	K05851	map00230,map02026,map05111	F
	K0038_00202	Transcriptional regulator SutA		K0038_00202				K0038_00213	IV02_05780	Phosphate-starvation-inducible E	5.80E-36	156.4	Pseudomonas syringae group		0					S
	K0038_00203	HAD-superfamily hydrolase		K0038_00203	K20862			K0038_00214			2.10E-42	177.9	Pseudomonas syringae group		0
	K0038_00204	integrase/recombinase XerC		K0038_00204	K03733			K0038_00215	gltP	Catalyzes the proton-dependent transport of glutamate and aspartate	2.30E-232	811.2	Pseudomonas syringae group		0			K03309,K11102,K11103	map02020	U
	K0038_00205	hypothetical protein		K0038_00205	K09921			K0038_00216	rimK	alpha-L-glutamate ligase	8.90E-167	592.8	Pseudomonas syringae group	EC:6.3.1.17; EC:6.3.2.32; EC:6.3.2.41	5	P:GO:0018410; F:GO:0042802; P:GO:0009432; C:GO:0005737; F:GO:0018169	P:C-terminal protein amino acid modification; F:identical protein binding; C:cytoplasm; F:ribosomal S6-glutamic acid ligase activity; P:SOS response	K05844,K14940,K18310	map00250,map00680,map01100,map01120	F
	K0038_00206	diaminopimelate epimerase		K0038_00206	K01778			K0038_00217	rimK	Putative ATP-dependant zinc protease	7.70E-85	319.7	Pseudomonas syringae group		0			K05844		O
	K0038_00207	diaminopimelate decarboxylase		K0038_00207	K01586			K0038_00218		Putative diguanylate phosphodiesterase	9.50E-141	506.1	Pseudomonas syringae group		0					T
	K0038_00208	lipoprotein LppL		K0038_00208				K0038_00219	hslR	Belongs to the HSP15 family	8.00E-67	259.6	Pseudomonas syringae group		6	F:GO:0003677; P:GO:0009451; F:GO:0043023; P:GO:0034605; F:GO:0003727; C:GO:0005829	F:ribosomal large subunit binding; P:RNA modification; F:single-stranded RNA binding; P:cellular response to heat; F:DNA binding; C:cytosol	K04762		J
	K0038_00209	cyaY protein		K0038_00209	K06202			K0038_00220	hslO	Redox regulated molecular chaperone. Protects both thermally unfolding and oxidatively damaged proteins from irreversible aggregation. Plays an important role in the bacterial defense system toward oxidative stress	8.30E-165	586.3	Pseudomonas syringae group		8	P:GO:0036506; F:GO:0042802; P:GO:0042026; F:GO:0008270; F:GO:0044183; P:GO:0006979; P:GO:0009408; C:GO:0005829	F:protein folding chaperone; F:identical protein binding; P:response to oxidative stress; P:maintenance of unfolded protein; F:zinc ion binding; P:protein refolding; P:response to heat; C:cytosol	K04083		O
	K0038_00211	regulator of nucleoside diphosphate kinase		K0038_00211	K06140			K0038_00221	pckA	Involved in the gluconeogenesis. Catalyzes the conversion of oxaloacetate (OAA) to phosphoenolpyruvate (PEP) through direct phosphoryl transfer between the nucleoside triphosphate and OAA	1.10E-297	1028.5	Pseudomonas syringae group	EC:4.1.1.49	3	F:GO:0004612; P:GO:0006094; C:GO:0005829	P:gluconeogenesis; F:phosphoenolpyruvate carboxykinase (ATP) activity; C:cytosol	K01610	map00010,map00020,map00620,map00710,map01100,map01110,map01120,map01130,map01200	F
	K0038_00212	adenylate cyclase, class I		K0038_00212	K05851			K0038_00222		Type VI secretion system (T6SS), amidase immunity protein	1.70E-54	218.8	Pseudomonas syringae group		0					S
	K0038_00213	hypothetical protein		K0038_00213				K0038_00224			1.10E-17	95.5	Pseudomonas syringae group		0
	K0038_00214	hypothetical protein		K0038_00214				K0038_00225		Acetyltransferase (GNAT) domain	3.30E-78	297.7	Pseudomonas syringae group		0			K03828		K
	K0038_00215	proton/glutamate symporter		K0038_00215	K11102			K0038_00226			3.40E-73	281.6	Pseudomonas syringae group		0
	K0038_00216	30S ribosomal protein S6--L-glutamate ligase		K0038_00216	K05844			K0038_00227			7.00E-103	380.2	Pseudomonas syringae group		0
	K0038_00217	ATP-dependent zinc protease		K0038_00217				K0038_00228			1.70E-62	245.4	Pseudomonas syringae group		0
	K0038_00218	diguanylate phosphodiesterase		K0038_00218				K0038_00229		Protein of unknown function (DUF861)	1.20E-121	442.6	Pseudomonas syringae group		0			K06995		S
	K0038_00219	heat shock protein 15		K0038_00219	K04762			K0038_00230		Acetyltransferase (GNAT) domain	5.10E-148	530.4	Pseudomonas syringae group		0					K
	K0038_00220	33 kDa chaperonin		K0038_00220	K04083			K0038_00231	hadL	Haloacid dehalogenase-like hydrolase	1.20E-128	465.7	Pseudomonas syringae group	EC:3.8.1.2	0			K01560	map00361,map00625,map01100,map01120	S
	K0038_00221	phosphoenolpyruvate carboxykinase		K0038_00221	K01610			K0038_00232	ordL	FAD dependent oxidoreductase	1.30E-238	832	Pseudomonas syringae group		0			K09471	map00330,map01100	E
	K0038_00222	type VI secretion system amidase immunity protein Tai4		K0038_00222				K0038_00233		Bacterial extracellular solute-binding proteins, family 5 Middle	0.00E0	1078.9	Pseudomonas syringae group		0			K02035	map02024	E
	K0038_00224	hypothetical protein		K0038_00224				K0038_00234		Binding-protein-dependent transport system inner membrane component	2.70E-166	591.3	Pseudomonas syringae group		0			K02033	map02024	P
	K0038_00225	acetyltransferase		K0038_00225				K0038_00235		Binding-protein-dependent transport system inner membrane component	9.30E-153	546.2	Pseudomonas syringae group		0			K02034	map02024	P
	K0038_00226	hypothetical protein		K0038_00226				K0038_00236		Oligopeptide/dipeptide transporter, C-terminal region	0.00E0	1129	Pseudomonas syringae group		0			K02031,K02032	map02024	P
	K0038_00227	hypothetical protein		K0038_00227				K0038_00237		2Fe-2S iron-sulfur cluster binding domain	3.90E-53	213.8	Pseudomonas syringae group	EC:1.5.3.1	0			K00302	map00260,map01100	C
	K0038_00228	Hypothetical protein		K0038_00228				K0038_00238		BFD-like [2Fe-2S] binding domain	1.70E-257	894.8	Pseudomonas syringae group		0					C
	K0038_00229	hypothetical protein		K0038_00229				K0038_00239		FAD dependent oxidoreductase	3.20E-209	734.2	Pseudomonas syringae group	EC:1.5.3.1	0			K00303	map00260,map01100	E
	K0038_00230	GNAT family N-acetyltransferase		K0038_00230				K0038_00240	argE	Belongs to the peptidase M20A family. ArgE subfamily	1.20E-213	748.8	Pseudomonas syringae group	EC:3.5.1.16	0			K01438	map00220,map01100,map01110,map01130,map01210,map01230	E
	K0038_00231	haloacid dehalogenase, type II		K0038_00231	K01560			K0038_00241	gabD	Aldehyde dehydrogenase family	2.30E-202	711.4	Pseudomonas syringae group	EC:1.2.1.16; EC:1.2.1.79; EC:1.2.1.20	0			K00135	map00250,map00310,map00350,map00650,map00760,map01100,map01120	C
	K0038_00232	FAD dependent oxidoreductase		K0038_00232				K0038_00242	ghrA	D-isomer specific 2-hydroxyacid dehydrogenase, NAD binding domain	4.50E-174	617.1	Pseudomonas syringae group	EC:1.1.1.79; EC:1.1.1.81	0			K12972	map00260,map00620,map00630,map01100,map01110,map01120	EH
	K0038_00233	peptide ABC transporter, periplasmic peptide-binding protein		K0038_00233	K02035			K0038_00243	gabT3	Belongs to the class-III pyridoxal-phosphate-dependent aminotransferase family	3.80E-243	847	Pseudomonas syringae group	EC:2.6.1.22; EC:2.6.1.19	0			K00823,K07250	map00250,map00280,map00410,map00640,map00650,map01100,map01120	E
	K0038_00234	peptide ABC transporter, permease protein		K0038_00234	K02033			K0038_00244		2-haloalkanoic acid dehalogenase	6.80E-116	423.3	Pseudomonas syringae group		0			K07025		S
	K0038_00235	peptide ABC transporter, permease protein		K0038_00235	K02034			K0038_00245	lrp	AsnC-type helix-turn-helix domain	3.90E-84	317.4	Pseudomonas syringae group		0			K03719		K
	K0038_00236	peptide ABC transporter, ATP-binding protein		K0038_00236	K02032			K0038_00246		Transposase IS200 like	9.00E-75	286.2	Pseudomonas syringae group		0					L
	K0038_00237	hypothetical protein		K0038_00237				K0038_00247		Methyl-accepting chemotaxis-like domains (chemotaxis sensory transducer).	2.00E-248	864.8	Pseudomonas syringae group		0			K03406	map02020,map02030	NT
	K0038_00238	pyridine nucleotide-disulfide oxidoreductase family protein		K0038_00238				K0038_00248	yejF	Oligopeptide/dipeptide transporter, C-terminal region	1.60E-291	1008.1	Pseudomonas syringae group		8	F:GO:0016887; F:GO:0005524; F:GO:0042626; P:GO:0042884; P:GO:0009410; P:GO:0042908; C:GO:0005886; P:GO:0035672	P:response to xenobiotic stimulus; P:oligopeptide transmembrane transport; F:ATP hydrolysis activity; F:ATPase-coupled transmembrane transporter activity; P:microcin transport; F:ATP binding; P:xenobiotic transport; C:plasma membrane	K13896	map02010	P
	K0038_00239	FAD dependent oxidoreductase		K0038_00239	K00303			K0038_00249	yejE	Binding-protein-dependent transport system inner membrane component	7.20E-189	666.4	Pseudomonas syringae group		5	P:GO:0042884; P:GO:0009410; P:GO:0042908; C:GO:0005886; P:GO:0035672	P:response to xenobiotic stimulus; P:oligopeptide transmembrane transport; P:microcin transport; P:xenobiotic transport; C:plasma membrane	K02034,K13895	map02010,map02024	P
	K0038_00240	acetylornithine deacetylase		K0038_00240	K01438			K0038_00250	yejB	Binding-protein-dependent transport system inner membrane component	1.20E-191	675.6	Pseudomonas syringae group		6	P:GO:0042884; P:GO:0009410; P:GO:0042908; C:GO:0005886; P:GO:0035672; F:GO:0022857	P:response to xenobiotic stimulus; F:transmembrane transporter activity; P:oligopeptide transmembrane transport; P:microcin transport; P:xenobiotic transport; C:plasma membrane	K02033,K13894	map02010,map02024	P
	K0038_00241	succinate-semialdehyde dehydrogenase		K0038_00241	K00135			K0038_00251	yejA	Bacterial extracellular solute-binding proteins, family 5 Middle	0.00E0	1238.8	Pseudomonas syringae group		0			K02035,K13893	map02010,map02024	E
	K0038_00242	D-isomer specific 2-hydroxyacid dehydrogenase family protein		K0038_00242	K12972			K0038_00252		TonB dependent receptor	0.00E0	1807.3	Pseudomonas syringae group		0			K02014		P
	K0038_00243	4-aminobutyrate aminotransferase		K0038_00243	K07250			K0038_00253	exbD1	Biopolymer transport protein	8.50E-61	239.6	Pseudomonas syringae group		0			K03559,K03560		U
	K0038_00244	hypothetical protein		K0038_00244				K0038_00254	tolQ	transport	5.10E-117	427.2	Pseudomonas syringae group		0			K03561,K03562	map01120	U
	K0038_00245	Lrp/AsnC family transcriptional regulator		K0038_00245				K0038_00255	tonB	TonB C terminal	1.10E-43	183	Pseudomonas syringae group		0			K03646,K03832		M
	K0038_00246	hypothetical protein		K0038_00246				K0038_00256	opdT	outer membrane porin, OprD family	1.80E-63	248.4	Pseudomonas syringae group		0					S
	K0038_00247	chemotaxis sensory transducer		K0038_00247	K03406			K0038_00257		self proteolysis	1.30E-10	71.2	Bacteria		0					M
	K0038_00248	microcin ABC transporter ATP-binding protein		K0038_00248	K13896			K0038_00258		NTF2 fold immunity protein	1.00E-6	60.1	Pectobacterium		0					S
	K0038_00249	peptide ABC transporter, permease protein		K0038_00249	K13895			K0038_00259			1.00E-17	96.3	Burkholderiaceae		0
	K0038_00250	peptide ABC transporter, permease protein		K0038_00250	K13894			K0038_00260		PAAR motif	4.50E-48	198	Pseudomonas syringae group		0					M
	K0038_00251	bacterial extracellular solute-binding protein, family 5		K0038_00251	K13893			K0038_00261		PAAR motif	0.00E0	2050.8	Pseudomonas syringae group		0					M
	K0038_00252	TonB-dependent receptor		K0038_00252	K02014			K0038_00262			1.90E-77	295.4	Pseudomonas syringae group		0
	K0038_00253	biopolymer transport protein ExbD, putative		K0038_00253	K03560			K0038_00263	czcA	Belongs to the resistance-nodulation-cell division (RND) (TC 2.A.6) family	0.00E0	1891.3	Pseudomonas syringae group		0			K15726		P
	K0038_00254	biopolymer transport protein ExbB, putative		K0038_00254	K03561			K0038_00264	czcB	Belongs to the membrane fusion protein (MFP) (TC 8.A.1) family	1.70E-200	705.3	Pseudomonas syringae group		0			K15727		M
	K0038_00255	energy transducer TonB		K0038_00255	K03832			K0038_00265	czcC	Outer membrane efflux protein	3.40E-201	707.6	Pseudomonas syringae group		0			K15725		MU
	K0038_00256	porin		K0038_00256				K0038_00266		DNA-binding heavy metal response regulator	5.00E-122	443.7	Pseudomonas syringae group		0					K
	K0038_00257	RHS repeat protein		K0038_00257				K0038_00267		PhoQ Sensor	1.50E-234	818.5	Pseudomonas syringae group		0					T
	K0038_00258	NTF2 fold immunity protein		K0038_00258				K0038_00268		MAPEG family	5.90E-62	243.4	Pseudomonas syringae group		0					S
	K0038_00259	hypothetical protein		K0038_00259				K0038_00269	yqjC	Protein of unknown function (DUF1090)	4.60E-46	190.7	Pseudomonas syringae group		0					S
	K0038_00260	Rhs family protein		K0038_00260				K0038_00270	ligB	Catalyzes the formation of phosphodiester linkages between 5'-phosphoryl and 3'-hydroxyl groups in double-stranded DNA using NAD as a coenzyme and as the energy source for the reaction	5.00E-288	996.5	Pseudomonas syringae group	EC:6.5.1.2	5	P:GO:0006288; P:GO:0006310; P:GO:0006260; F:GO:0003911; C:GO:0005829	P:DNA recombination; P:DNA replication; P:base-excision repair, DNA ligation; F:DNA ligase (NAD+) activity; C:cytosol	K01972	map03030,map03410,map03420,map03430	L
	K0038_00261	type IV secretion protein Rhs		K0038_00261				K0038_00271	metK	Catalyzes the formation of S-adenosylmethionine (AdoMet) from methionine and ATP. The overall synthetic reaction is composed of two sequential steps, AdoMet formation and the subsequent tripolyphosphate hydrolysis which occurs prior to release of AdoMet from the enzyme	5.90E-219	766.5	Pseudomonas syringae group	EC:2.5.1.6	12	F:GO:0000287; F:GO:0005524; P:GO:0006555; F:GO:0042802; F:GO:0030955; P:GO:0033353; F:GO:0004478; P:GO:0046498; P:GO:0006805; P:GO:0046439; P:GO:0006556; C:GO:0005829	F:magnesium ion binding; P:L-cysteine metabolic process; F:potassium ion binding; P:S-adenosylmethionine cycle; P:S-adenosylhomocysteine metabolic process; P:methionine metabolic process; F:identical protein binding; F:ATP binding; F:methionine adenosyltransferase activity; P:xenobiotic metabolic process; C:cytosol; P:S-adenosylmethionine biosynthetic process	K00789	map00270,map01100,map01110,map01230	H
	K0038_00262	hypothetical protein		K0038_00262				K0038_00272		transcriptional	2.10E-185	654.8	Pseudomonas syringae group		0			K03892		K
	K0038_00263	Heavy metal efflux pump CzcA		K0038_00263	K15726			K0038_00273	tkt	Catalyzes the transfer of a two-carbon ketol group from a ketose donor to an aldose acceptor, via a covalent intermediate with the cofactor thiamine pyrophosphate	0.00E0	1308.5	Pseudomonas syringae group	EC:2.2.1.1	0			K00615	map00030,map00710,map01051,map01100,map01110,map01120,map01130,map01200,map01230	G
	K0038_00264	Secretion protein HlyD		K0038_00264	K15727			K0038_00274	epd	Catalyzes the NAD-dependent conversion of D-erythrose 4- phosphate to 4-phosphoerythronate	5.10E-198	696.8	Pseudomonas syringae group	EC:1.2.1.12; EC:1.2.1.72	8	F:GO:0048001; F:GO:0004365; P:GO:0006805; P:GO:0008615; F:GO:0051287; P:GO:0042823; P:GO:0006006; C:GO:0005829	F:glyceraldehyde-3-phosphate dehydrogenase (NAD+) (phosphorylating) activity; F:NAD binding; P:pyridoxal phosphate biosynthetic process; P:glucose metabolic process; P:pyridoxine biosynthetic process; F:erythrose-4-phosphate dehydrogenase activity; P:xenobiotic metabolic process; C:cytosol	K00134,K03472	map00010,map00710,map00750,map01100,map01110,map01120,map01130,map01200,map01230,map04066,map05010	H
	K0038_00265	metal ion efflux outer membrane protein, putative		K0038_00265	K15725			K0038_00275	pgk	Belongs to the phosphoglycerate kinase family	7.90E-208	729.6	Pseudomonas syringae group	EC:5.3.1.1; EC:2.7.2.3	10	P:GO:0034404; P:GO:0019359; P:GO:0009168; P:GO:0009166; P:GO:0006096; P:GO:0006805; F:GO:0004618; P:GO:0006754; P:GO:0042866; C:GO:0005829	P:ATP biosynthetic process; P:nicotinamide nucleotide biosynthetic process; F:phosphoglycerate kinase activity; P:pyruvate biosynthetic process; P:nucleobase-containing small molecule biosynthetic process; P:glycolytic process; P:purine ribonucleoside monophosphate biosynthetic process; P:xenobiotic metabolic process; P:nucleotide catabolic process; C:cytosol	K00927,K01803	map00010,map00051,map00562,map00710,map01100,map01110,map01120,map01130,map01200,map01230	F
	K0038_00266	DNA-binding heavy metal response regulator		K0038_00266	K07665			K0038_00276			6.90E-39	166	Pseudomonas syringae group		0
	K0038_00267	heavy metal sensor histidine kinase		K0038_00267	K07644			K0038_00277			5.60E-26	122.9	Pseudomonas syringae group		0
	K0038_00268	hypothetical protein		K0038_00268				K0038_00278		Membrane-bound lysozyme-inhibitor of c-type lysozyme	1.80E-56	224.9	Pseudomonas syringae group		0					S
	K0038_00269	hypothetical protein		K0038_00269				K0038_00279	fba	Aldolase	3.80E-201	707.2	Pseudomonas syringae group	EC:4.1.2.13	0			K01624	map00010,map00030,map00051,map00680,map00710,map01100,map01110,map01120,map01130,map01200,map01230	G
	K0038_00270	NAD-dependent DNA ligase LigB		K0038_00270	K01972			K0038_00280		Protein of unknown function (DUF3010)	1.80E-69	268.5	Pseudomonas syringae group		0					S
	K0038_00271	S-adenosylmethionine synthetase		K0038_00271	K00789			K0038_00281		Pfam:DUF1311	1.50E-65	255.4	Pseudomonas syringae group		0					S
	K0038_00272	transcriptional regulator, ArsR family		K0038_00272				K0038_00282	IV02_16890	COG2355 Zn-dependent dipeptidase, microsomal dipeptidase homolog	6.90E-189	666.4	Pseudomonas syringae group	EC:3.4.13.19	0			K01273		E
	K0038_00273	transketolase		K0038_00273	K00615			K0038_00283	bchJ	V4R	1.90E-100	371.7	Pseudomonas syringae group		0			K07013		S
	K0038_00274	erythrose-4-phosphate dehydrogenase		K0038_00274	K03472			K0038_00284	stcD	HI0933-like protein	0.00E0	1405.2	Pseudomonas syringae group		0			K21833		C
	K0038_00275	phosphoglycerate kinase		K0038_00275	K00927			K0038_00285	dgcB	Domain of unknown function (DUF3483)	0.00E0	1271.5	Pseudomonas syringae group		0			K21834		C
	K0038_00276	lipoprotein, putative		K0038_00276				K0038_00286	etfA-1	Electron transfer flavoprotein, alpha subunit	5.20E-202	710.3	Pseudomonas syringae group		0			K03522		C
	K0038_00277	Hypothetical protein		K0038_00277				K0038_00287	eftB	Electron transfer flavoprotein, beta subunit	1.10E-118	433	Pseudomonas syringae group		0			K03521		C
	K0038_00278	lipoprotein, putative		K0038_00278				K0038_00288	chiA	Glycosyl hydrolases family 18	0.00E0	1140.9	Pseudomonas syringae group	EC:2.7.11.1; EC:3.2.1.14	0			K01183,K12567	map00520,map01100,map05410,map05414	G
	K0038_00279	Fructose-bisphosphate aldolase class II		K0038_00279	K01624			K0038_00289	gbcA	Rieske 2Fe-2S	2.60E-260	904	Pseudomonas syringae group		0			K00479		P
	K0038_00280	hypothetical protein		K0038_00280				K0038_00290	gbcB	COG1018 Flavodoxin reductases (ferredoxin-NADPH reductases) family 1	3.40E-213	747.3	Pseudomonas syringae group		0			K02639,K11107,K21832	map00195	C
	K0038_00281	hypothetical protein		K0038_00281				K0038_00293			5.60E-37	159.8	Pseudomonas syringae group		0
	K0038_00282	peptidase M19		K0038_00282	K01273			K0038_00294		Protein of unknown function (DUF3077)	2.30E-31	141	Pseudomonas syringae group		0					S
	K0038_00283	hydrocarbon binding protein		K0038_00283				K0038_00296	rlmJ	Specifically methylates the adenine in position 2030 of 23S rRNA	4.00E-161	573.9	Pseudomonas syringae group	EC:2.1.1.266	4	P:GO:0070475; P:GO:0015976; F:GO:0036307; C:GO:0005829	P:carbon utilization; F:23S rRNA (adenine(2030)-N(6))-methyltransferase activity; P:rRNA base methylation; C:cytosol	K07115		H
	K0038_00284	N-methylproline demethylase		K0038_00284	K21833			K0038_00297	msrA	Has an important function as a repair enzyme for proteins that have been inactivated by oxidation. Catalyzes the reversible oxidation-reduction of methionine sulfoxide in proteins to methionine	7.60E-120	436.4	Pseudomonas syringae group	EC:1.8.4.11	0			K07304		C
	K0038_00285	iron-sulfur cluster-binding protein		K0038_00285	K21834			K0038_00298		GAF domain	0.00E0	1691.4	Pseudomonas syringae group		0					T
	K0038_00286	electron transfer flavoprotein subunit alpha		K0038_00286	K03522			K0038_00299	hsrA	Major facilitator Superfamily	2.50E-248	864.4	Pseudomonas syringae group		0					EGP
	K0038_00287	electron transfer flavoprotein, beta subunit		K0038_00287	K03521			K0038_00300	tldD3	Putative modulator of DNA gyrase	9.80E-231	805.8	Pseudomonas syringae group		0					S
	K0038_00288	glycosyl hydrolase, family 18		K0038_00288				K0038_00301	tldD	TldD PmbA family protein	1.10E-264	918.7	Pseudomonas syringae group		0			K03568		S
	K0038_00289	Rieske [2Fe-2S] region		K0038_00289	K00479			K0038_00302	ltaE	Catalyzes the cleavage of L-allo-threonine and L- threonine to glycine and acetaldehyde	8.30E-201	706.1	Pseudomonas syringae group	EC:4.1.2.48	0			K01620	map00260,map01100,map01110,map01120,map01130,map01230	E
	K0038_00290	iron-sulfur cluster-binding protein		K0038_00290	K21832			K0038_00303		TraX protein	1.10E-122	446	Pseudomonas syringae group		0					S
	K0038_00291	Phage associated protein		K0038_00291				K0038_00304	rlmI	Met-10+ like-protein	1.10E-225	788.9	Pseudomonas syringae group	EC:2.1.1.72; EC:2.1.1.191	0			K00571,K06969		J
	K0038_00292	putative uncharacterized protein		K0038_00292				K0038_00305	pfpI	DJ-1/PfpI family	2.50E-92	344.7	Pseudomonas syringae group	EC:1.11.1.6; EC:3.5.1.124	0			K03781,K05520	map00380,map00630,map01110,map01130,map01200,map04011,map04016,map04068,map04146,map04211,map04212,map04213,map05014	S
	K0038_00293	hypothetical protein		K0038_00293				K0038_00306		HDOD domain	6.00E-152	543.5	Pseudomonas syringae group		0					T
	K0038_00294	Hypothetical protein		K0038_00294				K0038_00307	fpg	Involved in base excision repair of DNA damaged by oxidation or by mutagenic agents. Acts as DNA glycosylase that recognizes and removes damaged bases. Has a preference for oxidized purines, such as 7,8-dihydro-8-oxoguanine (8-oxoG). Has AP (apurinic apyrimidinic) lyase activity and introduces nicks in the DNA strand. Cleaves the DNA backbone by beta-delta elimination to generate a single-strand …	5.20E-150	537	Pseudomonas syringae group	EC:4.2.99.18; EC:3.2.2.23	8	F:GO:0008270; F:GO:0003684; F:GO:0008534; P:GO:0006285; F:GO:0003906; P:GO:0090305; F:GO:0004519; F:GO:0000703	P:base-excision repair, AP site formation; F:oxidized pyrimidine nucleobase lesion DNA N-glycosylase activity; P:nucleic acid phosphodiester bond hydrolysis; F:damaged DNA binding; F:DNA-(apurinic or apyrimidinic site) endonuclease activity; F:oxidized purine nucleobase lesion DNA N-glycosylase activity; F:zinc ion binding; F:endonuclease activity	K10563	map03410	L
	K0038_00296	hypothetical protein		K0038_00296	K07115			K0038_00308		Multidrug transporter	5.30E-48	196.8	Pseudomonas syringae group		0					S
	K0038_00297	peptide methionine sulfoxide reductase		K0038_00297	K07304			K0038_00309	fdx1	Ferredoxin	7.70E-44	182.6	Pseudomonas syringae group		0			K03522,K05337		C
	K0038_00298	GAF/PAS/GGDEF/EAL domain protein		K0038_00298				K0038_00310	coaD	Reversibly transfers an adenylyl group from ATP to 4'- phosphopantetheine, yielding dephospho-CoA (dPCoA) and pyrophosphate	4.20E-83	313.9	Pseudomonas syringae group	EC:2.7.7.3	4	F:GO:0042802; P:GO:0015937; F:GO:0004595; P:GO:0015940	P:pantothenate biosynthetic process; F:identical protein binding; P:coenzyme A biosynthetic process; F:pantetheine-phosphate adenylyltransferase activity	K00954	map00770,map01100	F
	K0038_00299	DHA2 family efflux MFS transporter permease subunit		K0038_00299				K0038_00311	phaD	Bacterial transcriptional repressor	4.60E-112	410.6	Pseudomonas syringae group		0					K
	K0038_00300	TldD/PmbA family protein		K0038_00300				K0038_00312	sseA	Rhodanese Homology Domain	1.10E-153	549.3	Pseudomonas syringae group	EC:2.8.1.2; EC:2.8.1.1	0			K01011	map00270,map00920,map01100,map01120,map04122	P
	K0038_00301	TldD/PmbA family protein		K0038_00301				K0038_00313	yheT	Serine aminopeptidase, S33	1.40E-184	652.1	Pseudomonas syringae group		2	P:GO:0044255; F:GO:0050526	F:poly(3-hydroxybutyrate) depolymerase activity; P:cellular lipid metabolic process	K07019		S
	K0038_00302	threonine aldolase, low-specificity		K0038_00302	K01620			K0038_00314			3.20E-1	41.2	Pseudomonas syringae group		0
	K0038_00303	TraX family protein		K0038_00303				K0038_00315	rsmD	Specifically methylates the guanine in position 966 of 16S rRNA in the assembled 30S particle	2.00E-106	391.7	Pseudomonas syringae group	EC:2.1.1.171	2	P:GO:0070475; F:GO:0052913	F:16S rRNA (guanine(966)-N(2))-methyltransferase activity; P:rRNA base methylation	K08316		L
	K0038_00304	SAM-dependent methyltransferase		K0038_00304	K06969			K0038_00316	MA20_05660	Peptidase M16 inactive domain	9.90E-264	915.6	Pseudomonas syringae group		0			K07263		S
	K0038_00305	protease PfpI		K0038_00305	K05520			K0038_00317	MA20_05655	Peptidase, M16	6.00E-252	876.3	Pseudomonas syringae group		0			K07263		S
	K0038_00306	hypothetical protein		K0038_00306				K0038_00318	ftsY	Involved in targeting and insertion of nascent membrane proteins into the cytoplasmic membrane. Acts as a receptor for the complex formed by the signal recognition particle (SRP) and the ribosome-nascent chain (RNC). Interaction with SRP-RNC leads to the transfer of the RNC complex to the Sec translocase for insertion into the membrane, the hydrolysis of GTP by both Ffh and FtsY, and the dissocia…	1.50E-203	715.7	Pseudomonas syringae group		8	F:GO:0005525; C:GO:0019897; C:GO:0031226; P:GO:0015833; P:GO:0006614; F:GO:0032550; F:GO:0003924; C:GO:0005829	C:extrinsic component of plasma membrane; F:purine ribonucleoside binding; P:peptide transport; C:intrinsic component of plasma membrane; F:GTP binding; F:GTPase activity; P:SRP-dependent cotranslational protein targeting to membrane; C:cytosol	K03110	map02024,map03060,map03070	U
	K0038_00307	formamidopyrimidine-DNA glycosylase		K0038_00307	K10563			K0038_00319	ftsE	Cell division ATP-binding protein FtsE	6.10E-120	436.8	Pseudomonas syringae group		13	F:GO:0000287; F:GO:0005524; P:GO:0008356; P:GO:0070297; F:GO:0030145; F:GO:0016887; P:GO:0022603; P:GO:0046677; C:GO:0031234; P:GO:0045881; C:GO:0005737; C:GO:0032153; P:GO:0090529	P:regulation of anatomical structure morphogenesis; F:magnesium ion binding; C:extrinsic component of cytoplasmic side of plasma membrane; F:ATP hydrolysis activity; P:response to antibiotic; C:cytoplasm; F:manganese ion binding; P:cell septum assembly; P:asymmetric cell division; C:cell division site; P:positive regulation of sporulation resulting in formation of a cellular spore; F:ATP binding;…	K09811,K09812	map02010	D
	K0038_00308	multidrug transporter		K0038_00308				K0038_00320	ftsX	Part of the ABC transporter FtsEX involved in cellular division	1.90E-181	641.7	Pseudomonas syringae group		6	C:GO:0005576; C:GO:0005887; P:GO:0051301; C:GO:0032153; C:GO:0009276; P:GO:0040007	C:integral component of plasma membrane; C:cell division site; P:growth; P:cell division; C:Gram-negative-bacterium-type cell wall; C:extracellular region	K09811,K09812	map02010	D
	K0038_00309	YfhL family 4Fe-4S dicluster ferredoxin		K0038_00309				K0038_00321	rpoH	Sigma-70 factor, region 1.2	3.30E-155	554.3	Pseudomonas syringae group		0			K03089		K
	K0038_00310	pantetheine-phosphate adenylyltransferase		K0038_00310	K00954			K0038_00322	mtgA	Peptidoglycan polymerase that catalyzes glycan chain elongation from lipid-linked precursors	6.60E-126	456.8	Pseudomonas syringae group	EC:2.4.1.129; EC:3.4.16.4	4	P:GO:0043164; F:GO:0008955; C:GO:0005886; P:GO:0009252	F:peptidoglycan glycosyltransferase activity; P:Gram-negative-bacterium-type cell wall biogenesis; P:peptidoglycan biosynthetic process; C:plasma membrane	K03814,K05365	map00550	M
	K0038_00311	transcriptional regulator, TetR family		K0038_00311				K0038_00323	ywdK	small membrane protein	9.80E-59	232.6	Pseudomonas syringae group		0					S
	K0038_00312	sulfurtransferase		K0038_00312	K01011			K0038_00324	thiS	ThiS family	1.50E-26	124.8	Gammaproteobacteria	EC:2.8.1.10	2	P:GO:0009228; P:GO:0006805	P:thiamine biosynthetic process; P:xenobiotic metabolic process	K03149,K03154	map00730,map01100,map04122	H
	K0038_00313	hydrolase		K0038_00313	K07019			K0038_00325	thiG	Catalyzes the rearrangement of 1-deoxy-D-xylulose 5- phosphate (DXP) to produce the thiazole phosphate moiety of thiamine. Sulfur is provided by the thiocarboxylate moiety of the carrier protein ThiS. In vitro, sulfur can be provided by H(2)S	6.70E-142	510	Pseudomonas syringae group	EC:2.8.1.10	3	P:GO:0009228; P:GO:0006805; F:GO:0003824	P:thiamine biosynthetic process; F:catalytic activity; P:xenobiotic metabolic process	K03149	map00730,map01100	H
	K0038_00314	hypothetical protein		K0038_00314				K0038_00326	trmB	Catalyzes the formation of N(7)-methylguanine at position 46 (m7G46) in tRNA	3.20E-138	497.7	Pseudomonas syringae group	EC:2.1.1.297; EC:2.4.99.15; EC:2.1.1.33; EC:2.4.99.12; EC:2.4.99.13; EC:2.4.99.14	5	C:GO:0043527; C:GO:0005737; F:GO:0008176; P:GO:0106004; P:GO:0040007	F:tRNA (guanine-N7-)-methyltransferase activity; P:growth; C:tRNA methyltransferase complex; C:cytoplasm; P:tRNA (guanine-N7)-methylation	K02493,K02527,K03439	map00540,map01100	J
	K0038_00315	16S rRNA m(2)G-966 methyltransferase		K0038_00315	K08316			K0038_00327	pchP	Phosphorylcholine phosphatase	7.20E-200	703	Pseudomonas syringae group		0			K21830		E
	K0038_00316	insulinase family protein		K0038_00316	K07263			K0038_00328	folA	Key enzyme in folate metabolism. Catalyzes an essential reaction for de novo glycine and purine synthesis, and for DNA precursor synthesis	1.60E-88	332	Pseudomonas syringae group	EC:1.5.1.3	0			K00287,K18589	map00670,map00790,map01100,map01523	H
	K0038_00317	peptidase, M16 family		K0038_00317	K07263			K0038_00329		Protein of unknown function (DUF2868)	1.90E-237	828.2	Pseudomonas syringae group		0					S
	K0038_00318	signal recognition particle-docking protein FtsY		K0038_00318	K03110			K0038_00331		Domain of unknown function (DUF3482)	8.20E-53	213	Pseudomonas syringae group		0					S
	K0038_00319	cell division ABC transporter, ATP-binding protein FtsE		K0038_00319	K09812			K0038_00332	betI	Repressor involved in choline regulation of the bet genes	2.90E-105	387.9	Pseudomonas syringae group		0			K02167		K
	K0038_00320	putative protein insertion permease FtsX		K0038_00320	K09811			K0038_00333	betB	Involved in the biosynthesis of the osmoprotectant glycine betaine. Catalyzes the reversible oxidation of betaine aldehyde to the corresponding acid	4.50E-277	959.9	Pseudomonas syringae group	EC:1.2.1.8	2	F:GO:0008802; P:GO:0006113	P:fermentation; F:betaine-aldehyde dehydrogenase activity	K00130	map00260,map01100	C
	K0038_00321	RNA polymerase sigma-32 factor		K0038_00321	K03089			K0038_00334	betA	Involved in the biosynthesis of the osmoprotectant glycine betaine. Catalyzes the oxidation of choline to betaine aldehyde and betaine aldehyde to glycine betaine at the same rate	0.00E0	1163.7	Pseudomonas syringae group	EC:1.1.99.1	6	C:GO:0016020; P:GO:0006970; P:GO:0006113; F:GO:0008812; P:GO:0042133; P:GO:0019285	P:neurotransmitter metabolic process; P:fermentation; C:membrane; F:choline dehydrogenase activity; P:response to osmotic stress; P:glycine betaine biosynthetic process from choline	K00108	map00260,map01100	E
	K0038_00322	peptidoglycan transglycosylase		K0038_00322	K03814			K0038_00335		PepSY-associated TM region	1.40E-204	718.8	Pseudomonas syringae group		0					S
	K0038_00323	hypothetical protein		K0038_00323				K0038_00336	yibF	Glutathione S-transferase, N-terminal domain	3.10E-102	377.9	Pseudomonas syringae group	EC:2.5.1.18	0			K00799	map00480,map00980,map00982,map00983,map01524,map05200,map05204,map05225,map05418	H
	K0038_00324	sulfur carrier protein ThiS		K0038_00324	K03154			K0038_00337		Putative ATP-dependant zinc protease	1.10E-86	325.9	Pseudomonas syringae group		0					O
	K0038_00325	thiG protein, putative		K0038_00325	K03149			K0038_00338	yihG	Phosphate acyltransferases	8.20E-165	586.3	Pseudomonas syringae group		0					I
	K0038_00326	methyltransferase, putative		K0038_00326	K03439			K0038_00339		rhs family	3.20E-99	368.6	Pseudomonas syringae group		0					M
	K0038_00327	hypothetical protein		K0038_00327	K21830			K0038_00340	PP0330	Protein of unknown function VcgC/VcgE (DUF2780)	1.80E-72	278.9	Pseudomonas syringae group		0					S
	K0038_00328	Dihydrofolate reductase type 3		K0038_00328	K00287			K0038_00341		COG3209 Rhs family protein	3.80E-89	335.1	Pseudomonas syringae group		0					M
	K0038_00329	hypothetical protein		K0038_00329				K0038_00342		COG3209 Rhs family protein	7.90E-42	176.4	Pseudomonas syringae group		0					M
	K0038_00330	hypothetical protein		K0038_00330				K0038_00343		COG3209 Rhs family protein	5.90E-30	137.9	Pseudomonas syringae group		0					M
	K0038_00331	hypothetical protein		K0038_00331				K0038_00344	fdhA	Glutathione-independent formaldehyde dehydrogenase	3.40E-230	803.9	Pseudomonas syringae group	EC:1.2.1.46; EC:1.1.1.14	0			K00008,K00148	map00040,map00051,map00625,map00680,map01100,map01120,map01200	C
	K0038_00332	regulatory protein BetI		K0038_00332	K02167			K0038_00345	purU	Catalyzes the hydrolysis of 10-formyltetrahydrofolate (formyl-FH4) to formate and tetrahydrofolate (FH4)	1.30E-162	578.9	Pseudomonas syringae group	EC:3.5.1.10	0			K01433	map00630,map00670	F
	K0038_00333	betaine aldehyde dehydrogenase BADH		K0038_00333	K00130			K0038_00347	soxG	Sarcosine oxidase, gamma subunit	1.20E-96	359.4	Pseudomonas syringae group	EC:1.5.3.1	0			K00305	map00260,map01100	E
	K0038_00334	choline dehydrogenase		K0038_00334	K00108			K0038_00348	soxA	Belongs to the GcvT family	0.00E0	2010.7	Pseudomonas syringae group	EC:2.1.2.10; EC:1.5.3.1	1	C:GO:0005737	C:cytoplasm	K00302,K00605	map00260,map00630,map00670,map01100,map01110,map01130,map01200	C
	K0038_00335	membrane protein, putative		K0038_00335				K0038_00349	soxD	Sarcosine oxidase delta subunit	7.90E-56	222.6	Pseudomonas syringae group	EC:1.5.3.1	0			K00302,K00304	map00260,map01100	E
	K0038_00336	glutathione S-transferase		K0038_00336				K0038_00350	soxB	Sarcosine oxidase	1.10E-247	862.1	Pseudomonas syringae group	EC:1.5.3.1	1	C:GO:0005737	C:cytoplasm	K00303	map00260,map01100	E
	K0038_00337	hypothetical protein		K0038_00337				K0038_00351	glyA	Catalyzes the reversible interconversion of serine and glycine with tetrahydrofolate (THF) serving as the one-carbon carrier. This reaction serves as the major source of one-carbon groups required for the biosynthesis of purines, thymidylate, methionine, and other important biomolecules. Also exhibits THF- independent aldolase activity toward beta-hydroxyamino acids, producing glycine and aldehyd…	9.60E-236	822.4	Pseudomonas syringae group	EC:2.1.2.1	1	C:GO:0005737	C:cytoplasm	K00600	map00260,map00460,map00630,map00670,map00680,map01100,map01110,map01120,map01130,map01200,map01230,map01523	E
	K0038_00338	acyltransferase family protein		K0038_00338				K0038_00352	choV	ATPases associated with a variety of cellular activities	1.00E-218	765.8	Pseudomonas syringae group	EC:3.6.3.32	10	P:GO:0006972; F:GO:0005524; P:GO:0015837; C:GO:1904949; P:GO:0031460; P:GO:0072488; C:GO:0043190; P:GO:0007165; F:GO:0005275; F:GO:0005034	P:amine transport; P:glycine betaine transport; F:amine transmembrane transporter activity; P:signal transduction; P:ammonium transmembrane transport; F:osmosensor activity; C:ATP-binding cassette (ABC) transporter complex; P:hyperosmotic response; C:ATPase complex; F:ATP binding	K02000	map02010	E
	K0038_00339	Rhs family protein		K0038_00339				K0038_00353	choW	ABC transporter permease	1.60E-146	525.4	Pseudomonas syringae group		5	P:GO:0015871; P:GO:0072488; F:GO:0005215; C:GO:0005886; P:GO:0006836	P:neurotransmitter transport; P:ammonium transmembrane transport; P:choline transport; F:transporter activity; C:plasma membrane	K02001,K02002	map02010	P
	K0038_00340	hypothetical protein		K0038_00340				K0038_00354	choX	Glycine betaine	1.40E-178	632.1	Pseudomonas syringae group		0			K02001,K02002	map02010	E
	K0038_00341	hypothetical protein		K0038_00341				K0038_00355	gbdR	COG4977 Transcriptional regulator containing an amidase domain and an AraC-type DNA-binding HTH domain	8.50E-204	716.1	Pseudomonas syringae group		0			K21826		K
	K0038_00342	RHS repeat-associated core domain-containing protein		K0038_00342				K0038_00356		Methyl-accepting chemotaxis protein	1.90E-223	781.9	Pseudomonas syringae group		0			K03406	map02020,map02030	T
	K0038_00343	RHS repeat-associated core domain protein		K0038_00343				K0038_00357			5.50E-28	129.8	Pseudomonas syringae group		0
	K0038_00344	formaldehyde dehydrogenase, glutathione-independent		K0038_00344	K00148			K0038_00358	zapA	Activator of cell division through the inhibition of FtsZ GTPase activity, therefore promoting FtsZ assembly into bundles of protofilaments necessary for the formation of the division Z ring. It is recruited early at mid-cell but it is not essential for cell division	7.60E-46	189.5	Pseudomonas syringae group		0			K09888		D
	K0038_00345	formyltetrahydrofolate deformylase		K0038_00345	K01433			K0038_00359	polC1	Exonuclease	3.50E-126	457.6	Pseudomonas syringae group	EC:2.7.7.7	0			K02342	map00230,map00240,map01100,map03030,map03430,map03440	L
	K0038_00346	hypothetical protein		K0038_00346				K0038_00360		Putative nucleotidyltransferase substrate binding domain	0.00E0	1246.9	Pseudomonas syringae group		0			K07182		T
	K0038_00347	sarcosine oxidase, gamma subunit		K0038_00347	K00305			K0038_00361		cheY-homologous receiver domain	1.00E-70	272.7	Pseudomonas syringae group		0			K10941	map02020,map02025,map05111	T
	K0038_00348	sarcosine oxidase, alpha subunit, heterotetrameric		K0038_00348	K00302			K0038_00362	glcB	Involved in the glycolate utilization. Catalyzes the condensation and subsequent hydrolysis of acetyl-coenzyme A (acetyl-CoA) and glyoxylate to form malate and CoA	0.00E0	1397.9	Pseudomonas syringae group	EC:2.3.3.9	20	F:GO:0000287; P:GO:0009436; P:GO:0006101; P:GO:0006099; P:GO:0015936; P:GO:0006805; P:GO:0044406; F:GO:0001968; C:GO:0009986; F:GO:0042803; C:GO:0005576; F:GO:0043236; C:GO:0030313; C:GO:0005886; C:GO:0042603; P:GO:0016999; F:GO:0046810; F:GO:0004474; C:GO:0005618; C:GO:0005829	F:magnesium ion binding; P:adhesion of symbiont to host; F:protein homodimerization activity; C:cell envelope; C:cell wall; C:capsule; C:extracellular region; F:laminin binding; C:plasma membrane; C:cytosol; P:antibiotic metabolic process; P:glyoxylate catabolic process; F:host cell extracellular matrix binding; C:cell surface; P:citrate metabolic process; F:malate synthase activity; F:fibronecti…	K01638	map00620,map00630,map01100,map01110,map01120,map01200	H
	K0038_00349	sarcosine oxidase, delta subunit		K0038_00349	K00304			K0038_00363	gcvR	glycine cleavage system	4.10E-84	317.4	Pseudomonas syringae group	EC:1.1.1.3; EC:1.1.1.399; EC:1.1.1.95	0			K00003,K00058	map00260,map00270,map00300,map00680,map01100,map01110,map01120,map01130,map01200,map01230	E
	K0038_00350	sarcosine oxidase subunit beta		K0038_00350	K00303			K0038_00364	rarD	EamA-like transporter family	2.70E-160	571.2	Pseudomonas syringae group		2	C:GO:0016021; C:GO:0005886	C:integral component of membrane; C:plasma membrane	K05786		S
	K0038_00351	serine hydroxymethyltransferase		K0038_00351	K00600			K0038_00365	srkA	A protein kinase that phosphorylates Ser and Thr residues. Probably acts to suppress the effects of stress linked to accumulation of reactive oxygen species. Probably involved in the extracytoplasmic stress response	3.90E-192	677.2	Pseudomonas syringae group		3	F:GO:0004674; C:GO:0005737; P:GO:0006468	C:cytoplasm; P:protein phosphorylation; F:protein serine/threonine kinase activity			F
	K0038_00352	glycine/betaine/L-proline ABC transporter, ATP-binding subunit		K0038_00352	K02000			K0038_00366	cytR_1	transcriptional	1.50E-175	622.1	Pseudomonas syringae group		0			K02529		K
	K0038_00353	glycine/betaine/L-proline ABC transporter, permease protein		K0038_00353	K02001			K0038_00367	phnS	Bacterial extracellular solute-binding protein	1.00E-187	662.5	Pseudomonas syringae group		0			K02055	map02024	P
	K0038_00354	glycine betaine/L-proline ABC transporter, periplasmic substrate-binding protein		K0038_00354	K02002			K0038_00368	cysT	Binding-protein-dependent transport system inner membrane component	2.20E-146	525	Pseudomonas syringae group		0			K02053	map02024	P
	K0038_00355	AraC		K0038_00355	K21826			K0038_00369	IV02_21915	Binding-protein-dependent transport system inner membrane component	1.60E-135	488.8	Pseudomonas syringae group		0			K02053	map02024	P
	K0038_00356	methyl-accepting chemotaxis protein		K0038_00356	K03406			K0038_00370	potA_1	Belongs to the ABC transporter superfamily	5.20E-187	660.2	Pseudomonas syringae group		0			K02052,K10111	map02010,map02024	P
	K0038_00357	hypothetical protein		K0038_00357				K0038_00371	cpdA	Calcineurin-like phosphoesterase superfamily domain	4.10E-158	563.9	Pseudomonas syringae group	EC:2.1.2.2; EC:3.1.4.53	0			K03651,K11175	map00230,map00670,map01100,map01110,map01130,map02025	S
	K0038_00358	hypothetical protein		K0038_00358	K09888			K0038_00372		Tat (Twin-arginine translocation) pathway signal sequence	0.00E0	1261.9	Pseudomonas syringae group		0			K07093		S
	K0038_00359	3'-5' exonuclease		K0038_00359	K02342			K0038_00373	modE	TOBE domain	2.50E-122	444.9	Pseudomonas syringae group		1	C:GO:0005829	C:cytosol	K02019,K05772	map02010	H
	K0038_00360	Putative cAMP-binding/CBS domain signal-transduction protein		K0038_00360	K07182			K0038_00374	comF	Competence protein	1.80E-109	402.1	Pseudomonas syringae group		2	P:GO:0015976; P:GO:0006308	P:DNA catabolic process; P:carbon utilization			S
	K0038_00361	response regulator		K0038_00361				K0038_00375	bioB	Catalyzes the conversion of dethiobiotin (DTB) to biotin by the insertion of a sulfur atom into dethiobiotin via a radical- based mechanism	7.70E-194	682.9	Pseudomonas syringae group	EC:2.8.1.6	8	P:GO:0009102; F:GO:0051537; C:GO:0005886; F:GO:0004076; P:GO:0006805; F:GO:0051539; C:GO:0005618; F:GO:1904047	C:cell wall; F:biotin synthase activity; F:S-adenosyl-L-methionine binding; P:biotin biosynthetic process; F:4 iron, 4 sulfur cluster binding; P:xenobiotic metabolic process; F:2 iron, 2 sulfur cluster binding; C:plasma membrane	K01012	map00780,map01100	H
	K0038_00362	malate synthase G		K0038_00362	K01638			K0038_00376	bioF	Catalyzes the decarboxylative condensation of pimeloyl- acyl-carrier protein and L-alanine to produce 8-amino-7- oxononanoate (AON), acyl-carrier protein , and carbon dioxide	2.80E-208	731.1	Pseudomonas syringae group	EC:2.8.1.6; EC:2.3.1.47	4	F:GO:0030170; P:GO:0009102; F:GO:0008710; P:GO:0006805	F:pyridoxal phosphate binding; F:8-amino-7-oxononanoate synthase activity; P:biotin biosynthetic process; P:xenobiotic metabolic process	K00652,K01012	map00780,map01100	H
	K0038_00363	glycine cleavage system protein R		K0038_00363				K0038_00377	bioH	alpha/beta hydrolase fold	4.30E-127	460.7	Pseudomonas syringae group	EC:3.1.1.85	0			K02170	map00780,map01100	S
	K0038_00364	rarD protein		K0038_00364	K05786			K0038_00378	bioC	Converts the free carboxyl group of a malonyl-thioester to its methyl ester by transfer of a methyl group from S-adenosyl- L-methionine (SAM). It allows to synthesize pimeloyl-ACP via the fatty acid synthetic pathway	3.00E-137	494.6	Pseudomonas syringae group	EC:2.1.1.197	8	P:GO:0032259; F:GO:0010340; P:GO:0009102; F:GO:0008757; F:GO:0052689; P:GO:0006805; F:GO:0004141; C:GO:0005737	F:S-adenosylmethionine-dependent methyltransferase activity; F:carboxyl-O-methyltransferase activity; F:carboxylic ester hydrolase activity; C:cytoplasm; F:dethiobiotin synthase activity; P:biotin biosynthetic process; P:xenobiotic metabolic process; P:methylation	K02169	map00780,map01100	H
	K0038_00365	hypothetical protein		K0038_00365				K0038_00379	bioD	Catalyzes a mechanistically unusual reaction, the ATP- dependent insertion of CO2 between the N7 and N8 nitrogen atoms of 7,8-diaminopelargonic acid (DAPA) to form an ureido ring	1.70E-107	395.6	Pseudomonas syringae group	EC:6.3.3.3	6	F:GO:0000287; F:GO:0005524; P:GO:0009102; P:GO:0006805; F:GO:0004141; C:GO:0005829	F:magnesium ion binding; F:dethiobiotin synthase activity; P:biotin biosynthetic process; F:ATP binding; P:xenobiotic metabolic process; C:cytosol	K01935	map00780,map01100	H
	K0038_00366	transcriptional repressor, LacI family		K0038_00366				K0038_00380			5.50E-41	173.3	Pseudomonas syringae group		0
	K0038_00367	putative periplasmic solute-binding protein		K0038_00367	K02055			K0038_00381	acd	Acyl-CoA dehydrogenase N terminal	0.00E0	1226.8	Pseudomonas syringae group		0					C
	K0038_00368	ABC transporter permease		K0038_00368	K02053			K0038_00382	VVA0815	diguanylate cyclase	1.60E-233	815.1	Pseudomonas syringae group		0					T
	K0038_00369	ABC transporter permease subunit		K0038_00369	K02053			K0038_00383	acd	Acyl-CoA dehydrogenase N terminal	0.00E0	1146.3	Pseudomonas syringae group	EC:1.3.8.7	0			K00249	map00071,map00280,map00410,map00640,map01100,map01110,map01130,map01200,map01212,map03320	C
	K0038_00370	ABC transporter, ATP-binding protein		K0038_00370	K02052			K0038_00385	yqaE	homolog of Blt101	1.10E-19	101.7	Gammaproteobacteria		0					S
	K0038_00371	Ser/Thr protein phosphatase family protein		K0038_00371	K03651			K0038_00386	pqqH	Prolyl oligopeptidase family	0.00E0	1164.4	Pseudomonas syringae group		0					E
	K0038_00372	Twin-arginine translocation pathway signal		K0038_00372	K07093			K0038_00387	pqqE	Pyrroloquinoline quinone biosynthesis protein E	1.50E-227	795	Pseudomonas syringae group		3	P:GO:0018212; P:GO:0018189; P:GO:0042364	P:pyrroloquinoline quinone biosynthetic process; P:water-soluble vitamin biosynthetic process; P:peptidyl-tyrosine modification	K06139		H
	K0038_00373	molybdate transport regulator ModE, putative		K0038_00373	K02019			K0038_00388	pqqD	peptidyl-tyrosine modification	7.20E-39	166.4	Pseudomonas syringae group		3	P:GO:0018212; P:GO:0018189; P:GO:0042364	P:pyrroloquinoline quinone biosynthetic process; P:water-soluble vitamin biosynthetic process; P:peptidyl-tyrosine modification	K06138		H
	K0038_00374	ComF family protein		K0038_00374				K0038_00389	pqqC	Ring cyclization and eight-electron oxidation of 3a-(2- amino-2-carboxyethyl)-4,5-dioxo-4,5,6,7,8,9-hexahydroquinoline- 7,9-dicarboxylic-acid to PQQ	6.10E-145	520	Pseudomonas syringae group	EC:1.3.3.11	0			K06137		H
	K0038_00375	biotin synthase BioB		K0038_00375	K01012			K0038_00390	pqqB	May be involved in the transport of PQQ or its precursor to the periplasm	6.00E-179	633.3	Pseudomonas syringae group	EC:3.1.4.55	3	P:GO:0018212; P:GO:0018189; P:GO:0042364	P:pyrroloquinoline quinone biosynthetic process; P:water-soluble vitamin biosynthetic process; P:peptidyl-tyrosine modification	K06136,K06167	map00440	H
	K0038_00376	8-amino-7-oxononanoate synthase		K0038_00376	K00652			K0038_00391	pqqF	Belongs to the peptidase M16 family	0.00E0	1162.5	Pseudomonas syringae group		0					O
	K0038_00377	alpha/beta fold hydrolase		K0038_00377	K02170			K0038_00392		Carbon-nitrogen hydrolase	8.80E-142	509.6	Pseudomonas syringae group	EC:3.5.5.1	0			K01501	map00380,map00460,map00627,map00643,map00910,map01120	S
	K0038_00378	malonyl-ACP O-methyltransferase BioC		K0038_00378	K02169			K0038_00393	iaaM	Flavin containing amine oxidoreductase	0.00E0	1156.7	Pseudomonas syringae group	EC:1.13.12.3	0			K00466	map00380	E
	K0038_00379	dethiobiotin synthase		K0038_00379	K01935			K0038_00394	IV02_19525	helix_turn_helix ASNC type	5.00E-73	280.4	Pseudomonas syringae group		0			K03719		K
	K0038_00380	pyrroloquinoline quinone biosynthesis protein PqqE		K0038_00380				K0038_00395	yeeA	Fusaric acid resistance protein-like	1.90E-192	678.3	Pseudomonas syringae group		1	C:GO:0005886	C:plasma membrane			S
	K0038_00381	acyl-CoA dehydrogenase domain-containing protein		K0038_00381				K0038_00396		Helix-turn-helix XRE-family like proteins	8.10E-46	189.5	Pseudomonas syringae group		0					K
	K0038_00382	GGDEF domain protein		K0038_00382				K0038_00397		protein related to capsule biosynthesis enzymes	9.10E-223	779.2	Gammaproteobacteria	EC:2.7.11.1	0			K07154		S
	K0038_00383	acyl-CoA dehydrogenase family protein		K0038_00383				K0038_00398		Domain of unknown function (DUF4172)	4.20E-182	644	Pseudomonas syringae group		0					S
	K0038_00385	unnamed protein product		K0038_00385				K0038_00399		#NAME?	4.60E-7	58.9	Bacteria		0					K
	K0038_00386	prolyl oligopeptidase family serine peptidase		K0038_00386				K0038_00400	dhbF	AMP-binding enzyme C-terminal domain	0.00E0	2473.4	Pseudomonas syringae group		0					Q
	K0038_00387	pyrroloquinoline quinone biosynthesis protein E		K0038_00387	K06139			K0038_00401	acpT2	4'-phosphopantetheinyl transferase superfamily	9.70E-67	260	Pseudomonas syringae group	EC:2.7.8.7	0			K00997,K06133	map00770	H
	K0038_00388	pyrroloquinoline quinone biosynthesis peptide chaperone PqqD		K0038_00388	K06138			K0038_00402		Nuclease-related domain	4.90E-82	311.2	Alcaligenaceae		0			K07039		S
	K0038_00389	pyrroloquinoline quinone biosynthesis protein PqqC		K0038_00389	K06137			K0038_00403		Nuclease-related domain	4.20E-80	305.1	Alcaligenaceae		0			K07039		S
	K0038_00390	coenzyme PQQ synthesis protein B		K0038_00390	K06136			K0038_00404	rci	Belongs to the 'phage' integrase family	2.60E-106	391.3	Gammaproteobacteria		0					L
	K0038_00391	pyrroloquinoline quinone biosynthesis protein PqqF		K0038_00391				K0038_00405	rci	Belongs to the 'phage' integrase family	9.10E-51	206.1	Gammaproteobacteria		0					L
	K0038_00392	carbon-nitrogen hydrolase		K0038_00392	K01506			K0038_00407		Putative diguanylate phosphodiesterase	0.00E0	1507.3	Pseudomonas syringae group		0					T
	K0038_00393	lysine 2-monooxygenase		K0038_00393	K00468			K0038_00408	rpoD	Sigma factors are initiation factors that promote the attachment of RNA polymerase to specific initiation sites and are then released. This sigma factor is the primary sigma factor during exponential growth	0.00E0	1117.8	Pseudomonas syringae group		5	F:GO:0016987; P:GO:0043254; P:GO:2000142; P:GO:0009408; C:GO:0005829	P:regulation of DNA-templated transcription, initiation; P:response to heat; P:regulation of protein-containing complex assembly; F:sigma factor activity; C:cytosol	K03086		K
	K0038_00394	helix-turn-helix, Fis-type		K0038_00394				K0038_00409	dnaG	RNA polymerase that catalyzes the synthesis of short RNA molecules used as primers for DNA polymerase during DNA replication	0.00E0	1262.3	Pseudomonas syringae group		4	F:GO:0003896; P:GO:0006269; F:GO:0008270; C:GO:0005737	F:DNA primase activity; P:DNA replication, synthesis of RNA primer; C:cytoplasm; F:zinc ion binding	K02316	map03030	L
	K0038_00395	putative membrane protein		K0038_00395				K0038_00410	rpsU	Belongs to the bacterial ribosomal protein bS21 family	1.30E-28	131.7	Pseudomonas putida group		4	P:GO:0006412; C:GO:0022627; F:GO:0003735; P:GO:0000028	F:structural constituent of ribosome; P:ribosomal small subunit assembly; P:translation; C:cytosolic small ribosomal subunit	K02970	map03010	J
	K0038_00396	Toxin/anti-toxin system, HipB-like anti-toxin module		K0038_00396				K0038_00411	tsaD	Required for the formation of a threonylcarbamoyl group on adenosine at position 37 (t(6)A37) in tRNAs that read codons beginning with adenine. Is involved in the transfer of the threonylcarbamoyl moiety of threonylcarbamoyl-AMP (TC-AMP) to the N6 group of A37, together with TsaE and TsaB. TsaD likely plays a direct catalytic role in this reaction	2.60E-191	674.5	Pseudomonas syringae group	EC:2.3.1.234	9	F:GO:0000287; P:GO:0002949; F:GO:0042802; F:GO:0140032; F:GO:0004222; P:GO:0006508; F:GO:0005506; C:GO:0000408; C:GO:0005829	F:magnesium ion binding; F:metalloendopeptidase activity; F:identical protein binding; P:proteolysis; C:EKC/KEOPS complex; F:glycosylation-dependent protein binding; P:tRNA threonylcarbamoyladenosine modification; F:iron ion binding; C:cytosol	K01409,K03070	map02024,map03060,map03070	J
	K0038_00397	type II toxin-antitoxin system HipA family toxin		K0038_00397	K07154			K0038_00412	plsY	Catalyzes the transfer of an acyl group from acyl- phosphate (acyl-PO(4)) to glycerol-3-phosphate (G3P) to form lysophosphatidic acid (LPA). This enzyme utilizes acyl-phosphate as fatty acyl donor, but not acyl-CoA or acyl-ACP	2.80E-94	351.3	Pseudomonas syringae group	EC:2.3.1.15	1	C:GO:0005886	C:plasma membrane	K08591	map00561,map00564,map01100,map01110	I
	K0038_00398	cell division protein Fic		K0038_00398				K0038_00413	folB	Catalyzes the conversion of 7,8-dihydroneopterin to 6- hydroxymethyl-7,8-dihydropterin	2.20E-51	208	Pseudomonas syringae group	EC:5.1.99.7; EC:4.1.2.25; EC:5.1.99.8; EC:1.13.11.81	2	F:GO:0042802; F:GO:0004150	F:identical protein binding; F:dihydroneopterin aldolase activity	K01633,K07589	map00790,map01100	H
	K0038_00399	GNAT family N-acetyltransferase		K0038_00399				K0038_00414	folK	7,8-dihydro-6-hydroxymethylpterin-pyrophosphokinase (HPPK)	4.20E-92	344	Pseudomonas syringae group	EC:4.1.2.25; EC:2.6.1.85; EC:2.7.6.3	0			K00950,K01665,K13940	map00790,map01100	H
	K0038_00400	amino acid adenylation domain-containing protein		K0038_00400				K0038_00415	cca	Catalyzes the addition and repair of the essential 3'- terminal CCA sequence in tRNAs without using a nucleic acid template. Adds these three nucleotides in the order of C, C, and A to the tRNA nucleotide-73, using CTP and ATP as substrates and producing inorganic pyrophosphate. Also shows phosphatase, 2'- nucleotidase and 2',3'-cyclic phosphodiesterase activities. These phosphohydrolase activiti…	2.90E-229	800.8	Pseudomonas syringae group	EC:2.7.7.72; EC:2.7.7.19	4	F:GO:0004810; F:GO:0016437; P:GO:0001680; P:GO:0042245	F:tRNA adenylyltransferase activity; P:RNA repair; F:tRNA cytidylyltransferase activity; P:tRNA 3'-terminal CCA addition	K00970,K00974	map03013,map03018	J
	K0038_00401	4'-phosphopantetheinyl transferase superfamily protein		K0038_00401	K06133			K0038_00416	spoVR	SpoVR like protein	1.10E-310	1071.6	Pseudomonas syringae group		1	P:GO:0006974	P:cellular response to DNA damage stimulus	K06415		S
	K0038_00402	preprotein translocase		K0038_00402				K0038_00417	yhbH	Belongs to the UPF0229 family	1.30E-235	822	Pseudomonas syringae group		0			K09786		S
	K0038_00403	preprotein translocase		K0038_00403				K0038_00418	prkA	PrkA family serine protein kinase	0.00E0	1272.3	Pseudomonas syringae group		3	P:GO:0006995; F:GO:0004672; P:GO:0006468	P:cellular response to nitrogen starvation; F:protein kinase activity; P:protein phosphorylation	K07180		T
	K0038_00404	site-specific recombinase, phage integrase family		K0038_00404				K0038_00419	glpE	Catalyzes, although with low efficiency, the sulfur transfer reaction from thiosulfate to cyanide	3.10E-50	204.1	Pseudomonas syringae group	EC:2.8.1.1	2	C:GO:0005737; F:GO:0004792	F:thiosulfate sulfurtransferase activity; C:cytoplasm	K02439,K07390	map00920,map01110,map01120	H
	K0038_00405	integrase		K0038_00405				K0038_00420	apaH	Hydrolyzes diadenosine 5',5'''-P1,P4-tetraphosphate to yield ADP	7.50E-158	563.1	Pseudomonas syringae group	EC:3.6.1.41	2	F:GO:0008138; P:GO:0006470	F:protein tyrosine/serine/threonine phosphatase activity; P:protein dephosphorylation	K01525	map00230	T
	K0038_00407	EAL domain-containing protein		K0038_00407				K0038_00421	apaG	ApaG domain	1.80E-60	238.4	Pseudomonas syringae group		0			K06195		P
	K0038_00408	RNA polymerase sigma factor RpoD		K0038_00408	K03086			K0038_00422	ksgA	Specifically dimethylates two adjacent adenosines (A1518 and A1519) in the loop of a conserved hairpin near the 3'-end of 16S rRNA in the 30S particle. May play a critical role in biogenesis of 30S subunits	4.50E-146	523.9	Pseudomonas syringae group	EC:2.1.1.182	7	F:GO:0019843; F:GO:0000179; P:GO:0070475; F:GO:0003690; F:GO:0003729; P:GO:0000028; C:GO:0005829	F:double-stranded DNA binding; F:rRNA (adenine-N6,N6-)-dimethyltransferase activity; P:ribosomal small subunit assembly; F:rRNA binding; P:rRNA base methylation; F:mRNA binding; C:cytosol	K02528		J
	K0038_00409	DNA primase		K0038_00409	K02316			K0038_00423	pdxA	Catalyzes the NAD(P)-dependent oxidation of 4- (phosphohydroxy)-L-threonine (HTP) into 2-amino-3-oxo-4- (phosphohydroxy)butyric acid which spontaneously decarboxylates to form 3-amino-2-oxopropyl phosphate (AHAP)	6.10E-177	626.7	Pseudomonas syringae group	EC:1.1.1.262; EC:1.1.1.409; EC:1.1.1.408	8	F:GO:0000287; F:GO:0042802; F:GO:0008270; P:GO:0006805; F:GO:0050570; P:GO:0008615; F:GO:0051287; P:GO:0042823	F:magnesium ion binding; F:4-hydroxythreonine-4-phosphate dehydrogenase activity; F:NAD binding; F:identical protein binding; P:pyridoxal phosphate biosynthetic process; P:pyridoxine biosynthetic process; F:zinc ion binding; P:xenobiotic metabolic process	K00097,K22024	map00750,map01100	H
	K0038_00410	30S ribosomal protein S21		K0038_00410	K02970			K0038_00424	surA	SurA N-terminal domain	1.40E-229	802	Pseudomonas syringae group	EC:5.2.1.8	9	F:GO:0003755; C:GO:0030288; P:GO:0051085; P:GO:0043165; P:GO:0060274; F:GO:0042277; F:GO:0051082; P:GO:0000413; P:GO:0050821	P:protein peptidyl-prolyl isomerization; P:protein stabilization; P:chaperone cofactor-dependent protein refolding; F:unfolded protein binding; P:Gram-negative-bacterium-type cell outer membrane assembly; F:peptide binding; F:peptidyl-prolyl cis-trans isomerase activity; P:maintenance of stationary phase; C:outer membrane-bounded periplasmic space	K03769,K03771		O
	K0038_00411	tRNA (adenosine(37)-N6)-threonylcarbamoyltransferase complex transferase subunit TsaD		K0038_00411	K01409			K0038_00425	lptD	Together with LptE, is involved in the assembly of lipopolysaccharide (LPS) at the surface of the outer membrane	0.00E0	1800.4	Pseudomonas syringae group		0			K04744		M
	K0038_00412	putative glycerol-3-phosphate acyltransferase PlsY		K0038_00412	K08591			K0038_00426		Phosphotransferase enzyme family	3.90E-187	660.6	Pseudomonas syringae group	EC:2.7.1.221	6	F:GO:0005524; P:GO:0097172; P:GO:0009254; P:GO:0006040; F:GO:0019200; P:GO:0046835	P:peptidoglycan turnover; F:ATP binding; P:carbohydrate phosphorylation; P:amino sugar metabolic process; F:carbohydrate kinase activity; P:N-acetylmuramic acid metabolic process	K07102	map00520,map01100	S
	K0038_00413	dihydroneopterin aldolase		K0038_00413	K01633			K0038_00427	rmlA	Nucleotidyl transferase	1.50E-123	448.7	Pseudomonas syringae group	EC:2.7.7.99; EC:2.7.7.13; EC:2.7.7.24	7	F:GO:0000287; P:GO:0097172; F:GO:0070569; F:GO:0002134; P:GO:0009254; P:GO:0006040; F:GO:0032551	F:magnesium ion binding; F:UTP binding; F:pyrimidine ribonucleoside binding; F:uridylyltransferase activity; P:peptidoglycan turnover; P:amino sugar metabolic process; P:N-acetylmuramic acid metabolic process	K00966,K00973,K00992	map00051,map00520,map00521,map00523,map00525,map01100,map01110,map01130	JM
	K0038_00414	2-amino-4-hydroxy-6- hydroxymethyldihydropteridine diphosphokinase		K0038_00414	K00950			K0038_00428	djlA	Tellurite resistance protein TerB	1.80E-131	475.3	Pseudomonas syringae group		0			K05801		O
	K0038_00415	multifunctional CCA addition/repair protein		K0038_00415	K00974			K0038_00429		Protein of unknown function (DUF3530)	3.50E-116	424.9	Pseudomonas syringae group		0					S
	K0038_00416	SpoVR family protein		K0038_00416	K06415			K0038_00430		Histidine kinase	0.00E0	1182.5	Pseudomonas syringae group	EC:2.7.13.3; EC:3.1.1.61; EC:2.1.1.80	0			K02030,K07708,K13924	map02020,map02030	T
	K0038_00417	Hypothetical protein		K0038_00417	K09786			K0038_00431	uhpA	helix_turn_helix, Lux Regulon	8.80E-105	386.3	Pseudomonas syringae group		0			K02282,K07686	map02020	K
	K0038_00418	Serine protein kinase (prkA protein), P-loop containing		K0038_00418	K07180			K0038_00433	potA	Part of the ABC transporter complex PotABCD involved in spermidine putrescine import. Responsible for energy coupling to the transport system	7.30E-211	739.6	Pseudomonas syringae group		0			K02052	map02024	P
	K0038_00419	thiosulfate sulfurtransferase		K0038_00419	K02439			K0038_00434	potD	Polyamine ABC transporter periplasmic polyamine-binding protein	7.20E-197	693	Pseudomonas syringae group		0			K02055	map02024	E
	K0038_00420	diadenosine tetraphosphatase		K0038_00420	K01525			K0038_00435	IV02_22180	Binding-protein-dependent transport system inner membrane component	8.40E-224	782.7	Pseudomonas syringae group		0			K02054	map02024	P
	K0038_00421	apaG protein		K0038_00421	K06195			K0038_00436	potC2	Binding-protein-dependent transport system inner membrane component	7.60E-141	506.5	Pseudomonas syringae group		0			K02053	map02024	P
	K0038_00422	dimethyladenosine transferase		K0038_00422	K02528			K0038_00437	rpe	Belongs to the ribulose-phosphate 3-epimerase family	1.00E-122	446	Pseudomonas syringae group	EC:5.1.3.1	0			K01783	map00030,map00040,map00710,map01100,map01110,map01120,map01130,map01200,map01230	G
	K0038_00423	4-hydroxythreonine-4-phosphate dehydrogenase		K0038_00423	K00097			K0038_00438	gph	Specifically catalyzes the dephosphorylation of 2- phosphoglycolate. Is involved in the dissimilation of the intracellular 2-phosphoglycolate formed during the DNA repair of 3'-phosphoglycolate ends, a major class of DNA lesions induced by oxidative stress	2.40E-147	528.1	Pseudomonas syringae group	EC:3.1.3.18	7	F:GO:0000287; F:GO:0031404; F:GO:0008967; P:GO:0016311; P:GO:0006281; P:GO:0005975; C:GO:0005829	F:magnesium ion binding; F:chloride ion binding; F:phosphoglycolate phosphatase activity; P:carbohydrate metabolic process; P:dephosphorylation; P:DNA repair; C:cytosol	K01091	map00630,map01100,map01110,map01130	F
	K0038_00424	PpiC-type peptidyl-prolyl cis-trans isomerase		K0038_00424	K03771			K0038_00439	trpE	Part of a heterotetrameric complex that catalyzes the two-step biosynthesis of anthranilate, an intermediate in the biosynthesis of L-tryptophan. In the first step, the glutamine- binding beta subunit (TrpG) of anthranilate synthase (AS) provides the glutamine amidotransferase activity which generates ammonia as a substrate that, along with chorismate, is used in the second step, catalyzed by the…	5.00E-276	956.4	Pseudomonas syringae group	EC:4.1.3.27	0			K01657	map00400,map00405,map01100,map01110,map01130,map01230,map02024,map02025	E
	K0038_00425	LPS-assembly protein LptD		K0038_00425	K04744			K0038_00440	estA	GDSL-like Lipase/Acylhydrolase	0.00E0	1232.6	Pseudomonas syringae group		2	F:GO:0016290; F:GO:0052689	F:palmitoyl-CoA hydrolase activity; F:carboxylic ester hydrolase activity	K12686		I
	K0038_00426	hypothetical protein		K0038_00426	K07102			K0038_00441		Pyocin activator protein PrtN	4.80E-44	183.3	Pseudomonas syringae group		0					K
	K0038_00427	mannose-1-phosphate guanylyltransferase		K0038_00427	K00992			K0038_00442		Protein of unknown function (DUF1654)	5.30E-29	133.3	Pseudomonas syringae group		0					S
	K0038_00428	DnaJ domain-containing protein		K0038_00428	K05801			K0038_00443		Helix-turn-helix XRE-family like proteins	8.20E-121	439.9	Pseudomonas syringae group		0					K
	K0038_00429	hypothetical protein		K0038_00429				K0038_00444			6.80E-72	276.6	Pseudomonas syringae group		0
	K0038_00430	transporter substrate-binding domain-containing protein		K0038_00430				K0038_00445		Mu-like prophage protein Com	6.90E-18	95.9	Proteobacteria		0					S
	K0038_00431	DNA-binding response regulator, NarL/FixJ family, contains REC and HTH domains		K0038_00431				K0038_00447			1.10E-64	252.7	Pseudomonas syringae group		0
	K0038_00432	hypothetical protein		K0038_00432				K0038_00448			2.70E-36	157.9	Pseudomonas syringae group		0
	K0038_00433	polyamine ABC transporter, ATP-binding protein		K0038_00433	K02052			K0038_00449			2.70E-103	381.3	Pseudomonas syringae group		0
	K0038_00434	polyamine ABC transporter, periplasmic polyamine-binding protein		K0038_00434	K02055			K0038_00450		Protein of unknown function (DUF2635)	4.40E-28	129.8	Pseudomonas syringae group		0					S
	K0038_00435	polyamine ABC transporter, permease protein		K0038_00435	K02054			K0038_00451		Tail sheath protein	3.20E-278	963.8	Pseudomonas syringae group		0					S
	K0038_00436	polyamine ABC transporter permease		K0038_00436	K02053			K0038_00452		Phage tail tube protein	1.30E-57	228.8	Pseudomonas syringae group		0					S
	K0038_00437	ribulose-phosphate 3-epimerase		K0038_00437	K01783			K0038_00453		Phage tail assembly chaperone proteins, E, or 41 or 14	1.50E-46	191.8	Pseudomonas syringae group		0					S
	K0038_00438	phosphoglycolate phosphatase		K0038_00438	K01091			K0038_00454		tail tape measure protein	5.20E-266	923.7	Pseudomonas syringae group		0					S
	K0038_00439	Anthranilate synthase component 1		K0038_00439	K01657			K0038_00455		DNA circulation protein	3.20E-195	688	Pseudomonas syringae group		0					S
	K0038_00440	autotransporting lipase, GDSL family protein		K0038_00440	K12686			K0038_00456		tail protein	4.30E-195	687.2	Pseudomonas syringae group		0					S
	K0038_00441	transcriptional regulator PrtN, putative		K0038_00441				K0038_00457		Phage baseplate assembly protein V	8.20E-85	319.7	Pseudomonas syringae group		0					S
	K0038_00442	hypothetical protein		K0038_00442				K0038_00458		Phage protein GP46	5.40E-68	263.5	Pseudomonas syringae group		0					S
	K0038_00443	repressor		K0038_00443				K0038_00459		Baseplate J-like protein	3.00E-182	644.4	Pseudomonas syringae group		0					S
	K0038_00444	Prophage PSSB64-02, Orf4		K0038_00444				K0038_00460	gp48	Uncharacterised protein conserved in bacteria (DUF2313)	1.40E-112	412.1	Pseudomonas syringae group		0					S
	K0038_00445	Com family DNA-binding transcriptional regulator		K0038_00445				K0038_00461		cellulose 1,4-beta-cellobiosidase activity	1.20E-184	653.3	Pseudomonas syringae group		0			K21449		G
	K0038_00446	hypothetical protein		K0038_00446				K0038_00462			1.10E-31	143.3	Pseudomonas syringae group		0
	K0038_00447	hypothetical protein		K0038_00447				K0038_00463		Chitinase class I	9.10E-90	336.3	Pseudomonas syringae group		0			K03791		S
	K0038_00448	lipoprotein, putative		K0038_00448				K0038_00464		Bacteriophage Rz lysis protein	2.70E-72	278.1	Pseudomonas syringae group		0					S
	K0038_00449	hypothetical protein		K0038_00449				K0038_00465	trpG	component II	6.60E-110	403.3	Pseudomonas syringae group	EC:4.1.3.27; EC:2.6.1.85	0			K01658,K01664	map00400,map00405,map00790,map01100,map01110,map01130,map01230,map02024,map02025	EH
	K0038_00450	hypothetical protein		K0038_00450				K0038_00466	trpD	Catalyzes the transfer of the phosphoribosyl group of 5- phosphorylribose-1-pyrophosphate (PRPP) to anthranilate to yield N-(5'-phosphoribosyl)-anthranilate (PRA)	7.00E-187	659.8	Pseudomonas syringae group	EC:4.1.3.27; EC:2.4.2.18	2	P:GO:0000162; F:GO:0004048	F:anthranilate phosphoribosyltransferase activity; P:tryptophan biosynthetic process	K00766,K13497	map00400,map01100,map01110,map01130,map01230	F
	K0038_00451	phage tail protein		K0038_00451				K0038_00467	trpC	Belongs to the TrpC family	1.90E-134	485.3	Pseudomonas syringae group	EC:4.1.1.48; EC:5.3.1.24	1	F:GO:0004425	F:indole-3-glycerol-phosphate synthase activity	K01609,K13498	map00400,map01100,map01110,map01130,map01230	E
	K0038_00452	hypothetical protein		K0038_00452				K0038_00468	lipL	Lipoate-protein ligase	1.80E-114	418.7	Pseudomonas syringae group	EC:2.3.1.200; EC:2.3.1.204	3	P:GO:0009107; F:GO:0016415; P:GO:0009249	F:octanoyltransferase activity; P:protein lipoylation; P:lipoate biosynthetic process	K16869,K18821		H
	K0038_00453	sigma factor domain protein		K0038_00453				K0038_00469	crp	COG0664 cAMP-binding proteins - catabolite gene activator and regulatory subunit of cAMP-dependent protein kinases	4.20E-110	404.1	Pseudomonas syringae group		11	C:GO:0032993; F:GO:0003700; F:GO:0042802; P:GO:0010628; F:GO:0035438; P:GO:0010629; P:GO:0045013; P:GO:0045893; F:GO:0046983; F:GO:0043565; C:GO:0005829	P:negative regulation of gene expression; F:sequence-specific DNA binding; F:identical protein binding; C:protein-DNA complex; P:carbon catabolite repression of transcription; F:cyclic-di-GMP binding; F:protein dimerization activity; P:positive regulation of transcription, DNA-templated; F:DNA-binding transcription factor activity; P:positive regulation of gene expression; C:cytosol	K10914	map02020,map02024,map02025,map02026,map05111	K
	K0038_00454	tail tape measure protein		K0038_00454				K0038_00470	yhfA	OsmC-like protein	4.60E-73	280.4	Pseudomonas syringae group		0			K07397		O
	K0038_00455	hydroxyacid dehydrogenase		K0038_00455				K0038_00471	speD	Catalyzes the decarboxylation of S-adenosylmethionine to S-adenosylmethioninamine (dcAdoMet), the propylamine donor required for the synthesis of the polyamines spermine and spermidine from the diamine putrescine	6.20E-148	530	Pseudomonas syringae group	EC:2.5.1.16; EC:4.1.1.50	4	F:GO:0004014; P:GO:0008295; P:GO:0097164; C:GO:0005829	P:spermidine biosynthetic process; F:adenosylmethionine decarboxylase activity; P:ammonium ion metabolic process; C:cytosol	K00797,K01611	map00270,map00330,map00410,map00480,map01100	F
	K0038_00456	prophage PSPPH01, 43 kDa tail protein		K0038_00456				K0038_00472	coq7	Oxygenase that introduces the hydroxyl group at carbon five of 2-nonaprenyl-3-methyl-6-methoxy-1,4-benzoquinol resulting in the formation of 2-nonaprenyl-3-methyl-5-hydroxy-6-methoxy-1,4- benzoquinol	2.80E-114	417.9	Pseudomonas syringae group		0			K06134	map00130,map01100,map01110	H
	K0038_00457	Phage baseplate assembly protein V		K0038_00457				K0038_00473	hinT	Scavenger mRNA decapping enzyme C-term binding	4.60E-60	236.9	Pseudomonas fluorescens group		0			K02503		FG
	K0038_00458	phage GP46 family protein		K0038_00458				K0038_00474		Belongs to the short-chain dehydrogenases reductases (SDR) family	8.50E-142	509.6	Pseudomonas syringae group		0			K07124		S
	K0038_00459	Baseplate J-like protein		K0038_00459				K0038_00475		Protein of unknown function (DUF805)	2.10E-139	501.9	Pseudomonas syringae group		0					S
	K0038_00460	tail protein, putative		K0038_00460				K0038_00476		Uncharacterised protein family (UPF0093)	1.30E-72	278.9	Pseudomonas syringae group		0			K08973		S
	K0038_00461	tail fiber protein		K0038_00461				K0038_00477	argC	Catalyzes the NADPH-dependent reduction of N-acetyl-5- glutamyl phosphate to yield N-acetyl-L-glutamate 5-semialdehyde	5.20E-195	686.8	Pseudomonas syringae group	EC:1.2.1.38	2	F:GO:0003942; P:GO:0006526	F:N-acetyl-gamma-glutamyl-phosphate reductase activity; P:arginine biosynthetic process	K00145	map00220,map01100,map01110,map01130,map01210,map01230	E
	K0038_00462	tail fiber assembly protein		K0038_00462				K0038_00478	erpA	Iron-sulfur cluster insertion protein ErpA	2.80E-60	237.7	Pseudomonas syringae group		9	F:GO:0051537; C:GO:0005886; F:GO:0051539; P:GO:0051604; P:GO:0009061; F:GO:0005506; P:GO:0016226; P:GO:0009060; C:GO:0005829	P:iron-sulfur cluster assembly; P:aerobic respiration; P:anaerobic respiration; P:protein maturation; F:iron ion binding; F:4 iron, 4 sulfur cluster binding; F:2 iron, 2 sulfur cluster binding; C:cytosol; C:plasma membrane	K13628,K15724		C
	K0038_00463	prophage PSPPH01, chitinase family protein		K0038_00463	K03791			K0038_00479	anmK	Catalyzes the specific phosphorylation of 1,6-anhydro-N- acetylmuramic acid (anhMurNAc) with the simultaneous cleavage of the 1,6-anhydro ring, generating MurNAc-6-P. Is required for the utilization of anhMurNAc either imported from the medium or derived from its own cell wall murein, and thus plays a role in cell wall recycling	2.20E-204	718	Pseudomonas syringae group	EC:4.2.1.126; EC:2.7.1.170	2	P:GO:0016310; F:GO:0016301	F:kinase activity; P:phosphorylation	K07106,K09001	map00520,map01100	F
	K0038_00464	lysis protein		K0038_00464				K0038_00480	yebA	Opacity-associated protein A LysM-like domain	3.60E-239	833.9	Pseudomonas syringae group		0					M
	K0038_00465	anthranilate synthase component II		K0038_00465	K01658			K0038_00481	tyrS	Catalyzes the attachment of tyrosine to tRNA(Tyr) in a two-step reaction tyrosine is first activated by ATP to form Tyr- AMP and then transferred to the acceptor end of tRNA(Tyr)	2.90E-221	774.2	Pseudomonas syringae group	EC:6.1.1.1	3	F:GO:0004831; P:GO:0006437; C:GO:0005829	P:tyrosyl-tRNA aminoacylation; F:tyrosine-tRNA ligase activity; C:cytosol	K01866	map00970	J
	K0038_00466	anthranilate phosphoribosyltransferase		K0038_00466	K00766			K0038_00482	queG	Catalyzes the conversion of epoxyqueuosine (oQ) to queuosine (Q), which is a hypermodified base found in the wobble positions of tRNA(Asp), tRNA(Asn), tRNA(His) and tRNA(Tyr)	4.80E-218	763.5	Pseudomonas syringae group	EC:1.17.99.6	4	P:GO:0022900; P:GO:0008616; F:GO:0009055; F:GO:0052693	P:queuosine biosynthetic process; F:electron transfer activity; F:epoxyqueuosine reductase activity; P:electron transport chain	K18979		H
	K0038_00467	indole-3-glycerol phosphate synthase		K0038_00467	K01609			K0038_00483	nnrD	Bifunctional enzyme that catalyzes the epimerization of the S- and R-forms of NAD(P)HX and the dehydration of the S-form of NAD(P)HX at the expense of ADP, which is converted to AMP. This allows the repair of both epimers of NAD(P)HX, a damaged form of NAD(P)H that is a result of enzymatic or heat-dependent hydration	5.60E-251	873.2	Pseudomonas syringae group	EC:5.1.99.6; EC:4.2.1.136	3	F:GO:0052856; F:GO:0052857; F:GO:0052855	F:NADPHX epimerase activity; F:NADHX epimerase activity; F:ADP-dependent NAD(P)H-hydrate dehydratase activity	K17758,K17759		H
	K0038_00468	lipoate--protein ligase family protein		K0038_00468				K0038_00484	yjeE	Threonylcarbamoyl adenosine biosynthesis protein TsaE	1.20E-82	312.4	Pseudomonas syringae group		4	F:GO:0016887; P:GO:0002949; F:GO:0042802; F:GO:0043531	F:ADP binding; F:identical protein binding; F:ATP hydrolysis activity; P:tRNA threonylcarbamoyladenosine modification	K06925		S
	K0038_00469	catabolite gene activator Crp		K0038_00469	K10914			K0038_00485	amiB	N-acetylmuramoyl-L-alanine amidase	2.40E-251	874.4	Pseudomonas syringae group	EC:3.5.1.28	3	C:GO:0030288; F:GO:0008745; P:GO:0043093	P:FtsZ-dependent cytokinesis; F:N-acetylmuramoyl-L-alanine amidase activity; C:outer membrane-bounded periplasmic space	K01448	map01503	M
	K0038_00470	peroxiredoxin		K0038_00470	K07397			K0038_00486	mutL	This protein is involved in the repair of mismatches in DNA. It is required for dam-dependent methyl-directed DNA mismatch repair. May act as a molecular matchmaker , a protein that promotes the formation of a stable complex between two or more DNA-binding proteins in an ATP-dependent manner without itself being part of a final effector complex	0.00E0	1199.5	Pseudomonas syringae group		7	F:GO:0016887; C:GO:0032300; F:GO:0005524; F:GO:0042802; P:GO:0006298; F:GO:0003697; P:GO:0000018	C:mismatch repair complex; P:regulation of DNA recombination; F:identical protein binding; F:ATP hydrolysis activity; F:single-stranded DNA binding; F:ATP binding; P:mismatch repair	K03572	map03430	L
	K0038_00471	adenosylmethionine decarboxylase proenzyme		K0038_00471	K01611			K0038_00487	miaA	Catalyzes the transfer of a dimethylallyl group onto the adenine at position 37 in tRNAs that read codons beginning with uridine, leading to the formation of N6-(dimethylallyl)adenosine (i(6)A)	7.60E-169	599.7	Pseudomonas syringae group	EC:2.5.1.75	5	P:GO:0006400; F:GO:0052381; P:GO:0034605; P:GO:1990497; P:GO:0040007	P:growth; F:tRNA dimethylallyltransferase activity; P:tRNA modification; P:regulation of cytoplasmic translation in response to stress; P:cellular response to heat	K00791	map00908,map01100,map01110	F
	K0038_00472	hypothetical protein		K0038_00472	K06134			K0038_00488	hfq	RNA chaperone that binds small regulatory RNA (sRNAs) and mRNAs to facilitate mRNA translational regulation in response to envelope stress, environmental stress and changes in metabolite concentrations. Also binds with high specificity to tRNAs	9.10E-40	169.1	Pseudomonas syringae group		8	P:GO:0040033; P:GO:0006378; P:GO:0045975; F:GO:0003723; F:GO:0003681; P:GO:0030423; C:GO:0005829; P:GO:0040029	P:positive regulation of translation, ncRNA-mediated; F:RNA binding; P:RNA-mediated gene silencing by inhibition of translation; F:bent DNA binding; P:targeting of mRNA for destruction involved in RNA interference; P:regulation of gene expression, epigenetic; P:mRNA polyadenylation; C:cytosol	K03666	map02024,map03018,map05111	J
	K0038_00473	putative HIT domain-containing protein		K0038_00473	K02503			K0038_00489	hflX	GTPase that associates with the 50S ribosomal subunit and may have a role during protein synthesis or ribosome biogenesis	7.40E-239	832.8	Pseudomonas syringae group		0			K03665		S
	K0038_00474	oxidoreductase, short chain dehydrogenase/reductase family		K0038_00474	K07124			K0038_00490	hflK	HflC and HflK could encode or regulate a protease	9.40E-156	556.6	Pseudomonas syringae group		7	P:GO:0006508; C:GO:0098796; P:GO:0043086; F:GO:0008233; P:GO:0009408; C:GO:0071575; C:GO:0005829	F:peptidase activity; C:membrane protein complex; P:proteolysis; P:response to heat; C:integral component of external side of plasma membrane; P:negative regulation of catalytic activity; C:cytosol	K04088		O
	K0038_00475	hypothetical protein		K0038_00475				K0038_00491	hflC	HflC and HflK could regulate a protease	1.30E-122	446	Pseudomonas syringae group		6	P:GO:0006508; C:GO:0098796; P:GO:0043086; F:GO:0008233; P:GO:0009408; C:GO:0071575	F:peptidase activity; C:membrane protein complex; P:proteolysis; P:response to heat; C:integral component of external side of plasma membrane; P:negative regulation of catalytic activity	K04087		O
	K0038_00476	hypothetical protein		K0038_00476	K08973			K0038_00492	hisZ	Required for the first step of histidine biosynthesis. May allow the feedback regulation of ATP phosphoribosyltransferase activity by histidine	7.50E-222	776.2	Pseudomonas syringae group	EC:6.1.1.21; EC:2.4.2.17	0			K00765,K01892,K02502	map00340,map00970,map01100,map01110,map01230	E
	K0038_00477	N-acetyl-gamma-glutamyl-phosphate reductase		K0038_00477	K00145			K0038_00493	purA	Plays an important role in the de novo pathway of purine nucleotide biosynthesis. Catalyzes the first committed step in the biosynthesis of AMP from IMP	2.20E-251	874.4	Pseudomonas syringae group	EC:6.3.4.4	8	F:GO:0004019; P:GO:0015949; P:GO:0006805; P:GO:0046086; P:GO:0046040; P:GO:0006974; P:GO:0044208; C:GO:0005829	P:'de novo' AMP biosynthetic process; P:cellular response to DNA damage stimulus; P:adenosine biosynthetic process; F:adenylosuccinate synthase activity; P:nucleobase-containing small molecule interconversion; P:IMP metabolic process; P:xenobiotic metabolic process; C:cytosol	K01939	map00230,map00250,map01100	F
	K0038_00478	putative iron binding protein from the HesB_IscA_SufA family protein		K0038_00478	K15724			K0038_00494		chemotaxis protein	1.30E-284	985.3	Pseudomonas syringae group		0			K03406	map02020,map02030	T
	K0038_00479	hypothetical protein		K0038_00479	K09001			K0038_00497	rnr	3'-5' exoribonuclease that releases 5'-nucleoside monophosphates and is involved in maturation of structured RNAs	0.00E0	1632.1	Pseudomonas syringae group		9	F:GO:0000175; F:GO:0008997; F:GO:0034458; F:GO:0017111; P:GO:0034470; P:GO:0090503; P:GO:0009409; P:GO:0006402; C:GO:0005829	P:ncRNA processing; F:3'-5'-exoribonuclease activity; P:RNA phosphodiester bond hydrolysis, exonucleolytic; P:mRNA catabolic process; F:3'-5' RNA helicase activity; P:response to cold; F:nucleoside-triphosphatase activity; C:cytosol; F:ribonuclease R activity	K12573	map03018	J
	K0038_00480	Peptidase, M23/M37 family		K0038_00480				K0038_00498	rlmB	Specifically methylates the ribose of guanosine 2251 in 23S rRNA	8.10E-137	493	Pseudomonas syringae group	EC:2.1.1.185	3	P:GO:0000453; F:GO:0070039; C:GO:0005829	F:rRNA (guanosine-2'-O-)-methyltransferase activity; P:enzyme-directed rRNA 2'-O-methylation; C:cytosol	K03218,K22132		J
	K0038_00481	Tyrosine--tRNA ligase		K0038_00481	K01866			K0038_00499	rpsF	Binds together with S18 to 16S ribosomal RNA	1.30E-56	225.7	Pseudomonas aeruginosa group	EC:4.3.1.19	5	P:GO:0006412; F:GO:0070181; C:GO:0022627; F:GO:0003735; F:GO:0048027	F:small ribosomal subunit rRNA binding; F:structural constituent of ribosome; F:mRNA 5'-UTR binding; P:translation; C:cytosolic small ribosomal subunit	K01754,K02990	map00260,map00290,map01100,map01110,map01130,map01200,map01230,map03010	J
	K0038_00482	epoxyqueuosine reductase		K0038_00482	K18979			K0038_00500	rpsR	Binds as a heterodimer with protein S6 to the central domain of the 16S rRNA, where it helps stabilize the platform of the 30S subunit	3.00E-34	150.6	Pseudomonas fluorescens group		5	P:GO:0006412; F:GO:0070181; C:GO:0022627; F:GO:0003735; F:GO:0048027	F:small ribosomal subunit rRNA binding; F:structural constituent of ribosome; F:mRNA 5'-UTR binding; P:translation; C:cytosolic small ribosomal subunit	K02963	map03010	J
	K0038_00483	bifunctional ADP-dependent NAD(P)H-hydrate dehydratase/NAD(P)H-hydrate epimerase		K0038_00483	K23997			K0038_00501		Membrane	1.10E-156	559.3	Pseudomonas syringae group		0					S
	K0038_00484	tRNA (adenosine(37)-N6)-threonylcarbamoyltransferase complex ATPase subunit type 1 TsaE		K0038_00484	K06925			K0038_00502	rplI	binds to the 23S rRNA	2.20E-70	271.6	Pseudomonas syringae group		6	P:GO:0006412; C:GO:0022625; C:GO:0005886; F:GO:0070180; F:GO:0003735; C:GO:0005618	C:cell wall; F:structural constituent of ribosome; C:cytosolic large ribosomal subunit; P:translation; F:large ribosomal subunit rRNA binding; C:plasma membrane	K02939	map03010	J
	K0038_00485	N-acetylmuramoyl-L-alanine amidase		K0038_00485	K01448			K0038_00503	dnaB	it exhibits DNA-dependent ATPase activity and contains distinct active sites for ATP binding, DNA binding, and interaction with DnaC protein, primase, and other prepriming proteins	3.60E-260	903.7	Pseudomonas syringae group	EC:3.6.4.12	7	P:GO:0006268; F:GO:0042802; F:GO:0003678; F:GO:0017111; P:GO:0010212; P:GO:0006259; C:GO:0005829	F:DNA helicase activity; P:DNA metabolic process; F:identical protein binding; P:response to ionizing radiation; F:nucleoside-triphosphatase activity; P:DNA unwinding involved in DNA replication; C:cytosol	K02314	map03030,map04112	L
	K0038_00486	DNA mismatch repair endonuclease MutL		K0038_00486	K03572			K0038_00504		COG3209 Rhs family protein	0.00E0	1321.2	Gammaproteobacteria		0			K11021		M
	K0038_00487	tRNA delta(2)-isopentenylpyrophosphate transferase		K0038_00487	K00791			K0038_00505	ygiQ	UPF0313 protein	0.00E0	1571.2	Pseudomonas syringae group		0					C
	K0038_00488	RNA chaperone Hfq		K0038_00488	K03666			K0038_00507	MA20_16195	Putative amidoligase enzyme (DUF2126)	0.00E0	2234.9	Pseudomonas syringae group		3	C:GO:0030115; F:GO:0005198; P:GO:0045229	F:structural molecule activity; P:external encapsulating structure organization; C:S-layer			E
	K0038_00489	GTP-binding protein HflX		K0038_00489	K03665			K0038_00508	MA20_16190	A predicted alpha-helical domain with a conserved ER motif.	0.00E0	1637.5	Pseudomonas syringae group		1	C:GO:0005886	C:plasma membrane			S
	K0038_00490	FtsH protease activity modulator HflK		K0038_00490	K04088			K0038_00509		Transglutaminase/protease-like homologues	4.10E-172	610.5	Pseudomonas syringae group		1	C:GO:0005886	C:plasma membrane			E
	K0038_00491	hflC protein		K0038_00491	K04087			K0038_00510	azu	Transfers electrons from cytochrome c551 to cytochrome oxidase	6.30E-73	280	Pseudomonas syringae group		4	P:GO:0009767; C:GO:0005886; F:GO:0005507; C:GO:0042597	P:photosynthetic electron transport chain; F:copper ion binding; C:periplasmic space; C:plasma membrane			C
	K0038_00492	ATP phosphoribosyltransferase regulatory subunit		K0038_00492	K02502			K0038_00511	nadE	Catalyzes the ATP-dependent amidation of deamido-NAD to form NAD. Uses ammonia as a nitrogen source	1.70E-148	531.9	Pseudomonas syringae group	EC:6.3.1.5	9	F:GO:0003952; P:GO:0034355; P:GO:0019674; F:GO:0008795; P:GO:0034628; P:GO:0006734; P:GO:0006974; P:GO:0030436; C:GO:0005829	F:NAD+ synthase (glutamine-hydrolyzing) activity; P:cellular response to DNA damage stimulus; P:NADH metabolic process; P:'de novo' NAD biosynthetic process from aspartate; P:NAD salvage; P:asexual sporulation; F:NAD+ synthase activity; P:NAD metabolic process; C:cytosol	K01916	map00760,map01100	F
	K0038_00493	adenylosuccinate synthetase		K0038_00493	K01939			K0038_00512	pncB	Catalyzes the synthesis of beta-nicotinate D- ribonucleotide from nicotinate and 5-phospho-D-ribose 1-phosphate at the expense of ATP	4.60E-235	820.1	Pseudomonas syringae group	EC:6.3.4.21	12	P:GO:0009435; P:GO:0019358; P:GO:0045892; P:GO:0031509; P:GO:0019674; C:GO:0005634; P:GO:0000183; P:GO:0009408; P:GO:0006734; F:GO:0004516; C:GO:0005829; P:GO:0007569	P:negative regulation of transcription, DNA-templated; F:nicotinate phosphoribosyltransferase activity; P:cell aging; P:rDNA heterochromatin assembly; P:NADH metabolic process; P:subtelomeric heterochromatin assembly; C:nucleus; P:response to heat; P:NAD biosynthetic process; P:NAD metabolic process; C:cytosol; P:nicotinate nucleotide salvage	K00763	map00760,map01100	F
	K0038_00494	methyl-accepting chemotaxis protein		K0038_00494				K0038_00513		Transcriptional regulator	7.30E-169	599.7	Pseudomonas syringae group		0					K
	K0038_00497	RNAse R		K0038_00497	K12573			K0038_00514	livJ	amino acid	2.60E-208	731.1	Pseudomonas syringae group		0			K01999	map02010,map02024	E
	K0038_00498	23S rRNA (guanosine(2251)-2'-O)-methyltransferase RlmB		K0038_00498	K03218			K0038_00515	livH	Belongs to the binding-protein-dependent transport system permease family	1.80E-159	568.5	Pseudomonas syringae group		0			K01997	map02010,map02024	E
	K0038_00499	30S ribosomal protein S6		K0038_00499	K02990			K0038_00516	braE	Belongs to the binding-protein-dependent transport system permease family	3.20E-234	817.4	Pseudomonas syringae group		0			K01995,K01998	map02010,map02024	P
	K0038_00500	30S ribosomal protein S18		K0038_00500	K02963			K0038_00517	livG	amino acid ABC transporter, ATP-binding protein	2.10E-160	571.6	Pseudomonas syringae group		0			K01995,K01998	map02010,map02024	E
	K0038_00501	membrane protein, putative		K0038_00501				K0038_00518	livF	High-affinity branched-chain amino acid transport ATP-binding protein	1.00E-125	456.1	Pseudomonas syringae group		0			K01996	map02010,map02024	P
	K0038_00502	50S ribosomal protein L9		K0038_00502	K02939			K0038_00519	ydfG	COG4221 Short-chain alcohol dehydrogenase of	1.10E-138	499.2	Pseudomonas syringae group	EC:1.1.1.381	0			K16066	map00240,map00260,map01100	S
	K0038_00503	replicative DNA helicase		K0038_00503	K02314			K0038_00520	pmi	N-acylglucosamine 2-epimerase (GlcNAc 2-epimerase)	4.20E-209	733.8	Pseudomonas syringae group	EC:5.1.3.8; EC:5.1.3.11; EC:5.3.1.8	0			K01787,K01809,K16213	map00051,map00520,map01100,map01110,map01130	G
	K0038_00504	RHS repeat protein		K0038_00504	K11021			K0038_00521	ureJ	HupE / UreJ protein	1.60E-92	345.5	Pseudomonas syringae group		0			K03192		O
	K0038_00505	radical sam domain protein		K0038_00505				K0038_00522	ureG	Facilitates the functional incorporation of the urease nickel metallocenter. This process requires GTP hydrolysis, probably effectuated by UreG	1.80E-110	405.2	Pseudomonas syringae group		0			K03189,K04652		F
	K0038_00506	hypothetical protein		K0038_00506				K0038_00523	ureF	Required for maturation of urease via the functional incorporation of the urease nickel metallocenter	1.80E-116	425.2	Pseudomonas syringae group		0			K03188		O
	K0038_00507	IMP dehydrogenase		K0038_00507				K0038_00524	ureE	Involved in urease metallocenter assembly. Binds nickel. Probably functions as a nickel donor during metallocenter assembly	6.80E-92	343.2	Pseudomonas syringae group		0			K03187		J
	K0038_00508	hypothetical protein		K0038_00508				K0038_00525	desT	Represses the transcription of fabB, involved in unsaturated fatty acid (UFA) biosynthesis. By controlling UFA production, FabR directly influences the physical properties of the membrane bilayer	7.50E-112	409.8	Gammaproteobacteria		0			K22105		K
	K0038_00509	transglutaminase		K0038_00509				K0038_00526	yhjG	AsmA family	0.00E0	1355.9	Pseudomonas syringae group		3	P:GO:0090087; P:GO:0090313; C:GO:0005886	P:regulation of peptide transport; P:regulation of protein targeting to membrane; C:plasma membrane	K07289,K07290		M
	K0038_00510	azurin		K0038_00510				K0038_00527	oprG	Outer membrane protein W	4.70E-120	437.2	Pseudomonas syringae group		0			K07275		M
	K0038_00511	ammonia-dependent NAD(+) synthetase		K0038_00511	K01916			K0038_00528		Protein of unknown function (DUF3299)	1.20E-91	342.4	Pseudomonas syringae group		0			K09950		M
	K0038_00512	nicotinate phosphoribosyltransferase		K0038_00512	K00763			K0038_00529		Permease	3.80E-232	810.4	Pseudomonas syringae group		0			K02004		V
	K0038_00513	transcriptional regulator, LysR family		K0038_00513	K03566			K0038_00530	bceA	ABC transporter, ATP-binding protein	1.10E-122	446	Pseudomonas syringae group		0			K02003		V
	K0038_00514	branched-chain amino acid ABC transporter, periplasmic branched-chain amino acid-binding protein LivJ		K0038_00514	K01999			K0038_00531	lraI	Protein of unknown function (DUF2796)	4.00E-91	340.9	Pseudomonas syringae group	EC:4.99.1.12; EC:1.6.5.3	0			K00341,K02077,K09121,K09796	map00190,map01100	P
	K0038_00515	high-affinity branched-chain amino acid ABC transporter, permease protein BraD		K0038_00515	K01997			K0038_00532		SnoaL-like domain	8.30E-70	269.6	Pseudomonas syringae group		0					S
	K0038_00516	high-affinity branched-chain amino acid ABC transporter permease LivM		K0038_00516	K01998			K0038_00533			1.70E-52	211.8	Pseudomonas syringae group		0
	K0038_00517	high affinity branched-chain amino acid ABC transporter, ATP-binding protein		K0038_00517	K01995			K0038_00534	ybbN	Tetratricopeptide repeat	9.20E-153	546.2	Pseudomonas syringae group		4	F:GO:0015035; P:GO:0061077; P:GO:0008152; C:GO:0005829	F:protein-disulfide reductase activity; P:chaperone-mediated protein folding; P:metabolic process; C:cytosol	K05838		O
	K0038_00518	ABC transporter ATP-binding protein		K0038_00518	K01996			K0038_00535	prmA_2	Lysine methyltransferase	4.30E-110	404.1	Pseudomonas syringae group		5	P:GO:1904736; P:GO:1904733; F:GO:0016279; P:GO:0018023; C:GO:0005759	P:negative regulation of electron transfer activity; C:mitochondrial matrix; P:peptidyl-lysine trimethylation; P:negative regulation of fatty acid beta-oxidation using acyl-CoA dehydrogenase; F:protein-lysine N-methyltransferase activity			J
	K0038_00519	serine 3-dehydrogenase		K0038_00519				K0038_00536	ybaY	Type III secretion system lipoprotein chaperone (YscW)	3.40E-66	257.7	Pseudomonas syringae group		0			K09914		M
	K0038_00520	N-acylglucosamine 2-epimerase (GlcNAc 2-epimerase) family protein		K0038_00520				K0038_00537	nrdR	Negatively regulates transcription of bacterial ribonucleotide reductase nrd genes and operons by binding to NrdR- boxes	3.00E-84	317.8	Pseudomonas syringae group		5	F:GO:0005524; P:GO:0045892; P:GO:0010629; F:GO:0003690; C:GO:0005829	P:negative regulation of gene expression; P:negative regulation of transcription, DNA-templated; F:double-stranded DNA binding; F:ATP binding; C:cytosol	K07738		K
	K0038_00521	HupE/UreJ family protein		K0038_00521	K03192			K0038_00538	ribD	Converts 2,5-diamino-6-(ribosylamino)-4(3h)-pyrimidinone 5'-phosphate into 5-amino-6-(ribosylamino)-2,4(1h,3h)- pyrimidinedione 5'-phosphate	2.00E-203	714.9	Pseudomonas syringae group	EC:3.5.4.26; EC:1.1.1.193	6	F:GO:0050661; F:GO:0008703; F:GO:0008835; P:GO:0009231; P:GO:0009451; P:GO:0006805	F:NADP binding; P:RNA modification; F:diaminohydroxyphosphoribosylaminopyrimidine deaminase activity; P:riboflavin biosynthetic process; P:xenobiotic metabolic process; F:5-amino-6-(5-phosphoribosylamino)uracil reductase activity	K11752	map00740,map01100,map01110,map02024	H
	K0038_00522	Urease accessory protein UreG		K0038_00522	K03189			K0038_00539	ribE	Riboflavin synthase, alpha	5.60E-118	430.3	Pseudomonas syringae group	EC:2.5.1.9; EC:3.5.4.25; EC:4.1.99.12	4	F:GO:0004746; P:GO:0009231; P:GO:0006805; C:GO:0005829	F:riboflavin synthase activity; P:riboflavin biosynthetic process; P:xenobiotic metabolic process; C:cytosol	K00793,K14652	map00740,map00790,map01100,map01110	H
	K0038_00523	urease accessory protein UreF		K0038_00523	K03188			K0038_00540	ribB	Catalyzes the conversion of D-ribulose 5-phosphate to formate and 3,4-dihydroxy-2-butanone 4-phosphate	3.20E-203	714.1	Pseudomonas syringae group	EC:3.5.4.25; EC:4.1.99.12	0			K02858,K14652	map00740,map00790,map01100,map01110	H
	K0038_00524	urease accessory protein UreE		K0038_00524	K03187			K0038_00541	ribH	Catalyzes the formation of 6,7-dimethyl-8- ribityllumazine by condensation of 5-amino-6-(D- ribitylamino)uracil with 3,4-dihydroxy-2-butanone 4-phosphate. This is the penultimate step in the biosynthesis of riboflavin	5.30E-78	297	Pseudomonas syringae group	EC:2.5.1.78	4	F:GO:0000906; P:GO:0009231; P:GO:0006805; C:GO:0005829	F:6,7-dimethyl-8-ribityllumazine synthase activity; P:riboflavin biosynthetic process; P:xenobiotic metabolic process; C:cytosol	K00794	map00740,map01100,map01110	H
	K0038_00525	transcriptional regulator, TetR family		K0038_00525	K22105			K0038_00542	nusB	Involved in transcription antitermination. Required for transcription of ribosomal RNA (rRNA) genes. Binds specifically to the boxA antiterminator sequence of the ribosomal RNA (rrn) operons	9.40E-86	322.8	Pseudomonas syringae group		2	P:GO:0006353; C:GO:0005829	P:DNA-templated transcription, termination; C:cytosol	K03625		K
	K0038_00526	AsmA family protein		K0038_00526	K07290			K0038_00543	thiL	Catalyzes the ATP-dependent phosphorylation of thiamine- monophosphate (TMP) to form thiamine-pyrophosphate (TPP), the active form of vitamin B1	2.30E-160	571.6	Pseudomonas syringae group	EC:2.7.4.16	7	F:GO:0000287; P:GO:0009228; F:GO:0009030; F:GO:0005524; P:GO:0016310; P:GO:0006805; P:GO:0009229	P:thiamine biosynthetic process; F:magnesium ion binding; P:phosphorylation; F:thiamine-phosphate kinase activity; F:ATP binding; P:xenobiotic metabolic process; P:thiamine diphosphate biosynthetic process	K00946	map00730,map01100	H
	K0038_00527	outer membrane protein, OmpW family		K0038_00527	K07275			K0038_00544	ribA	Catalyzes the conversion of GTP to 2,5-diamino-6- ribosylamino-4(3H)-pyrimidinone 5'-phosphate (DARP), formate and pyrophosphate	4.30E-112	410.6	Pseudomonas syringae group	EC:3.5.4.25	5	F:GO:0016799; P:GO:1901135; P:GO:0009231; P:GO:0006805; F:GO:0003935	P:carbohydrate derivative metabolic process; F:GTP cyclohydrolase II activity; F:hydrolase activity, hydrolyzing N-glycosyl compounds; P:riboflavin biosynthetic process; P:xenobiotic metabolic process	K01497	map00740,map00790,map01100,map01110,map02024	F
	K0038_00528	lipoprotein		K0038_00528	K09950			K0038_00545			1.40E-63	248.8	Pseudomonas syringae group		0
	K0038_00529	permease, putative		K0038_00529	K02004			K0038_00546	dxs	Catalyzes the acyloin condensation reaction between C atoms 2 and 3 of pyruvate and glyceraldehyde 3-phosphate to yield 1-deoxy-D-xylulose-5-phosphate (DXP)	0.00E0	1226.5	Pseudomonas syringae group	EC:2.2.1.7	12	F:GO:0000287; F:GO:0030976; P:GO:0009228; F:GO:0030975; P:GO:0019288; P:GO:0006805; F:GO:0030145; P:GO:0008615; F:GO:0008661; C:GO:0005829; P:GO:0006744; P:GO:0040007	P:thiamine biosynthetic process; F:magnesium ion binding; F:thiamine pyrophosphate binding; F:thiamine binding; P:growth; P:isopentenyl diphosphate biosynthetic process, methylerythritol 4-phosphate pathway; P:ubiquinone biosynthetic process; P:pyridoxine biosynthetic process; F:1-deoxy-D-xylulose-5-phosphate synthase activity; P:xenobiotic metabolic process; C:cytosol; F:manganese ion binding	K01662	map00730,map00900,map01100,map01110,map01130	F
	K0038_00530	ABC transporter, ATP-binding protein		K0038_00530	K02003			K0038_00547	ispA	Belongs to the FPP GGPP synthase family	7.20E-153	546.6	Pseudomonas syringae group	EC:2.5.1.29; EC:2.5.1.90; EC:2.5.1.10; EC:2.5.1.1	3	P:GO:0008299; C:GO:0005737; F:GO:0004659	F:prenyltransferase activity; P:isoprenoid biosynthetic process; C:cytoplasm	K00795,K02523,K13789	map00900,map01100,map01110,map01130	H
	K0038_00531	hypothetical protein		K0038_00531				K0038_00548	xseB	Bidirectionally degrades single-stranded DNA into large acid-insoluble oligonucleotides, which are then degraded further into small acid-soluble oligonucleotides	1.10E-34	152.1	Pseudomonas syringae group	EC:3.1.11.6	5	C:GO:0009318; F:GO:0008855; P:GO:0090305; P:GO:0006308; C:GO:0005829	P:DNA catabolic process; P:nucleic acid phosphodiester bond hydrolysis; C:exodeoxyribonuclease VII complex; F:exodeoxyribonuclease VII activity; C:cytosol	K03602	map03430	L
	K0038_00532	nuclear transport factor 2 family protein		K0038_00532				K0038_00549	metC	cystathionine beta-lyase	7.10E-209	733	Gammaproteobacteria	EC:4.4.1.8; EC:4.4.1.11	0			K01760,K01761	map00270,map00450,map01100,map01110,map01230	E
	K0038_00533	hypothetical protein		K0038_00533				K0038_00550		Protein of unknown function (DUF1016)	1.30E-177	629	Pseudomonas syringae group		0					S
	K0038_00534	thioredoxin		K0038_00534	K05838			K0038_00551	yghU	Glutathione S-transferase	9.20E-158	562.8	Pseudomonas syringae group		2	F:GO:0015036; P:GO:0008152	F:disulfide oxidoreductase activity; P:metabolic process	K11209		O
	K0038_00535	methyltransferase		K0038_00535				K0038_00552	rfbD	ABC-2 type transporter	6.30E-129	466.8	Pseudomonas syringae group		0			K01992,K09690	map02010	GM
	K0038_00536	YbaY family lipoprotein		K0038_00536				K0038_00553		ATPases associated with a variety of cellular activities	9.10E-122	443	Pseudomonas syringae group	EC:3.6.3.38	0			K09689,K09691	map02010	GM
	K0038_00537	transcriptional repressor NrdR		K0038_00537	K07738			K0038_00554		Nucleotidyl transferase	8.70E-123	446.4	Pseudomonas syringae group		0					M
	K0038_00538	riboflavin biosynthesis protein RibD		K0038_00538	K11752			K0038_00555		glycerophosphoryl diester phosphodiesterase	9.10E-110	402.9	Pseudomonas syringae group		0					C
	K0038_00539	riboflavin synthase		K0038_00539	K00793			K0038_00556		HAD-hyrolase-like	5.10E-108	397.1	Pseudomonas syringae group		0					S
	K0038_00540	3,4-dihydroxy-2-butanone 4-phosphate synthase/GTP cyclohydrolase II		K0038_00540	K14652			K0038_00557		Nucleotidyl transferase	5.40E-122	443.7	Pseudomonas syringae group		0					JM
	K0038_00541	riboflavin synthase, beta subunit		K0038_00541	K00794			K0038_00558		Cupin 2, conserved barrel domain protein	5.40E-50	203.4	Gammaproteobacteria		0					S
	K0038_00542	N utilization substance protein B		K0038_00542	K03625			K0038_00559		WavE lipopolysaccharide synthesis	9.00E-163	579.7	Pseudomonas syringae group		0					S
	K0038_00543	thiamine-phosphate kinase		K0038_00543	K00946			K0038_00560			2.50E-65	256.1	Bacteria		0
	K0038_00544	GTP cyclohydrolase II		K0038_00544	K01497			K0038_00561		Belongs to the class I-like SAM-binding methyltransferase superfamily. C5-methyltransferase family	1.90E-98	366.3	Oscillatoriales	EC:2.1.1.37	0			K00558	map00270,map01100,map05206	H
	K0038_00545	MFS transporter		K0038_00545				K0038_00562		Peptidase S24-like	3.10E-133	481.1	Pseudomonas syringae group		0					K
	K0038_00546	1-deoxy-D-xylulose-5-phosphate synthase		K0038_00546	K01662			K0038_00563	ppa	Catalyzes the hydrolysis of inorganic pyrophosphate (PPi) forming two phosphate ions	3.50E-99	367.5	Pseudomonas syringae group	EC:3.6.1.1	0			K01507	map00190	C
	K0038_00547	geranyltranstransferase		K0038_00547	K13789			K0038_00564	mtfA	Belongs to the MtfA family	2.70E-129	468	Pseudomonas syringae group		6	P:GO:0043433; P:GO:0006508; F:GO:0004177; F:GO:0008134; P:GO:0048519; C:GO:0005829	P:negative regulation of DNA-binding transcription factor activity; F:aminopeptidase activity; P:proteolysis; P:negative regulation of biological process; F:transcription factor binding; C:cytosol	K09933		S
	K0038_00548	exodeoxyribonuclease VII, small subunit		K0038_00548	K03602			K0038_00565	dedA	SNARE associated Golgi protein	3.80E-111	407.5	Pseudomonas syringae group		0			K03975		S
	K0038_00549	cystathionine beta-lyase		K0038_00549	K01760			K0038_00566	VY92_01935	Acetyltransferase (GNAT) domain	1.80E-75	288.5	Pseudomonas syringae group		0					K
	K0038_00550	hypothetical protein		K0038_00550				K0038_00567	eutC	Belongs to the EutC family	2.10E-146	525	Pseudomonas syringae group	EC:4.3.1.7	4	C:GO:0005622; C:GO:0009350; F:GO:0008851; F:GO:0031419	C:intracellular anatomical structure; F:cobalamin binding; C:ethanolamine ammonia-lyase complex; F:ethanolamine ammonia-lyase activity	K03736	map00564,map01100	E
	K0038_00551	glutathione S-transferase family protein		K0038_00551	K11209			K0038_00568	eutB	Ethanolamine ammonia lyase large subunit (EutB)	3.50E-255	887.1	Pseudomonas syringae group	EC:4.3.1.7	0			K03735	map00564,map01100	E
	K0038_00552	ABC transporter permease		K0038_00552	K09690			K0038_00569	aldA	Belongs to the aldehyde dehydrogenase family	6.90E-289	999.2	Pseudomonas syringae group	EC:1.2.1.3	0			K00128,K00138,K18370	map00010,map00053,map00071,map00280,map00310,map00330,map00340,map00380,map00410,map00561,map00620,map00625,map00640,map00903,map00981,map01100,map01110,map01120,map01130	C
	K0038_00553	O-antigen ABC transporter, ATP-binding protein		K0038_00553	K09691			K0038_00570	murC	Reutilizes the intact tripeptide L-alanyl-gamma-D- glutamyl-meso-diaminopimelate by linking it to UDP-N- acetylmuramate	2.90E-254	884	Pseudomonas syringae group	EC:6.3.2.8; EC:6.3.2.4; EC:6.3.2.45	0			K01921,K01924,K02558	map00471,map00473,map00550,map01100,map01502	M
	K0038_00554	NTP transferase domain-containing protein		K0038_00554				K0038_00571	ubiX	Flavin prenyltransferase that catalyzes the synthesis of the prenylated FMN cofactor (prenyl-FMN) for 4-hydroxy-3- polyprenylbenzoic acid decarboxylase UbiD. The prenyltransferase is metal-independent and links a dimethylallyl moiety from dimethylallyl monophosphate (DMAP) to the flavin N5 and C6 atoms of FMN	1.80E-113	415.2	Pseudomonas syringae group	EC:2.5.1.129	2	F:GO:0008694; P:GO:0006744	F:3-octaprenyl-4-hydroxybenzoate carboxy-lyase activity; P:ubiquinone biosynthetic process	K03186	map00130,map00627,map00940,map01100,map01110,map01120,map01220	H
	K0038_00555	phosphodiesterase		K0038_00555				K0038_00572		Protein of unknown function (DUF1375)	5.00E-42	176.8	Pseudomonas syringae group		0					S
	K0038_00556	HAD-IA family hydrolase		K0038_00556	K01838			K0038_00573	yraR	NAD(P)H-binding	9.90E-112	409.5	Pseudomonas syringae group		0					GM
	K0038_00557	glycosyl transferase family 2		K0038_00557				K0038_00574		Caspase domain	1.40E-152	546.6	Pseudomonas syringae group		0					S
	K0038_00558	hypothetical protein		K0038_00558				K0038_00575		MaoC like domain	3.70E-73	281.2	Pseudomonas syringae group	EC:4.2.1.55	0			K17865	map00630,map00650,map01120,map01200	I
	K0038_00559	WavE lipopolysaccharide synthesis		K0038_00559				K0038_00576	lrgA	LrgA family	4.50E-53	213.8	Pseudomonas syringae group		5	P:GO:0015031; F:GO:0005215; C:GO:0005886; P:GO:0009253; P:GO:0015833	P:peptidoglycan catabolic process; P:peptide transport; P:protein transport; F:transporter activity; C:plasma membrane	K05338,K06518	map02020	S
	K0038_00560	hypothetical protein		K0038_00560				K0038_00577	lrgB	LrgB-like family	2.10E-118	431.8	Pseudomonas syringae group		0					M
	K0038_00561	DNA cytosine methyltransferase		K0038_00561	K00558			K0038_00578	lonD	ATP-dependent protease	3.00E-99	367.9	Pseudomonas syringae group	EC:3.4.21.53	0			K01338,K07157	map04112	S
	K0038_00562	transcriptional regulator, putative		K0038_00562				K0038_00579	VPA1096	Domain of unknown function (DUF4136)	6.10E-97	360.1	Pseudomonas syringae group		0					M
	K0038_00563	Inorganic pyrophosphatase		K0038_00563	K01507			K0038_00580		Domain of unknown function (DUF4136)	3.70E-103	380.9	Pseudomonas syringae group		0					M
	K0038_00564	zinc-dependent peptidase		K0038_00564	K09933			K0038_00581	cmoM	Catalyzes the methylation of 5-carboxymethoxyuridine (cmo5U) to form 5-methoxycarbonylmethoxyuridine (mcmo5U) at position 34 in tRNAs	7.20E-138	496.5	Pseudomonas syringae group		3	P:GO:0002098; P:GO:0030488; F:GO:0097697	P:tRNA methylation; F:tRNA 5-carboxymethoxyuridine methyltransferase activity; P:tRNA wobble uridine modification	K06219,K20444		J
	K0038_00565	Protein DedA		K0038_00565	K03975			K0038_00582		MazG-like family	2.50E-49	201.1	Pseudomonas syringae group		0					C
	K0038_00566	acetyltransferase, GNAT family		K0038_00566				K0038_00583		MaoC like domain	2.10E-149	535	Pseudomonas syringae group		0					I
	K0038_00567	ethanolamine ammonia-lyase small subunit		K0038_00567	K03736			K0038_00584		NAD dependent epimerase/dehydratase family	5.00E-246	856.7	Pseudomonas syringae group		0					IQ
	K0038_00568	ethanolamine ammonia-lyase, heavy subunit		K0038_00568	K03735			K0038_00585	fadI	Belongs to the thiolase family	1.40E-237	828.6	Pseudomonas syringae group	EC:2.3.1.9	5	C:GO:0005782; F:GO:0003729; C:GO:0005758; P:GO:0006635; F:GO:0003988	P:fatty acid beta-oxidation; C:peroxisomal matrix; C:mitochondrial intermembrane space; F:acetyl-CoA C-acyltransferase activity; F:mRNA binding	K00626	map00071,map00072,map00280,map00310,map00362,map00380,map00620,map00630,map00640,map00650,map00720,map00900,map01100,map01110,map01120,map01130,map01200,map01212,map02020	I
	K0038_00569	putative aldehyde dehydrigenase		K0038_00569	K00138			K0038_00586			2.20E-36	157.9	Pseudomonas syringae group		0
	K0038_00570	UDP-N-acetylmuramate:L-alanyl-gamma-D-glutamyl- meso-diaminopimelate ligase		K0038_00570	K02558			K0038_00587		Protein of unknown function (DUF726)	5.50E-248	863.2	Bacteria		0					S
	K0038_00571	3-octaprenyl-4-hydroxybenzoate carboxy-lyase, putative		K0038_00571	K03186			K0038_00588		SBF-like CPA transporter family (DUF4137)	1.30E-177	629	Pseudomonas syringae group		0			K14347		S
	K0038_00572	lipoprotein, putative		K0038_00572				K0038_00589	ripA_1	AraC-like ligand binding domain	1.70E-148	531.9	Pseudomonas syringae group		0					K
	K0038_00573	hypothetical protein		K0038_00573				K0038_00590	IV02_22125	RIO1 family	1.90E-148	531.9	Pseudomonas syringae group	EC:2.7.11.1	0			K07178	map03008	DT
	K0038_00574	MORN repeat family protein		K0038_00574				K0038_00591	cueR	transcriptional	5.10E-66	256.9	Pseudomonas syringae group		0			K19591		K
	K0038_00575	MaoC family dehydratase		K0038_00575				K0038_00592	copA	P-type ATPase	0.00E0	1283.1	Pseudomonas syringae group	EC:3.6.3.54	2	F:GO:0042802; C:GO:0005886	F:identical protein binding; C:plasma membrane	K17686	map01524,map04016	P
	K0038_00576	LrgA family protein		K0038_00576	K06518			K0038_00593			5.80E-59	233.4	Pseudomonas syringae group		0
	K0038_00577	membrane protein		K0038_00577				K0038_00594	copZ	copper chaperone	5.30E-24	116.3	Gammaproteobacteria		0			K07089,K07213	map04978	P
	K0038_00578	ATP-dependent protease La domain protein		K0038_00578	K07157			K0038_00595	bcr	Major facilitator Superfamily	9.90E-206	722.6	Pseudomonas syringae group		0			K07552		EGP
	K0038_00579	lipoprotein, putative		K0038_00579				K0038_00596		Belongs to the zinc-containing alcohol dehydrogenase family. Quinone oxidoreductase subfamily	5.10E-179	633.6	Pseudomonas syringae group		0					C
	K0038_00580	hypothetical protein		K0038_00580				K0038_00597		Bacterial regulatory helix-turn-helix protein, lysR family	2.00E-166	591.7	Pseudomonas syringae group		0					K
	K0038_00581	smtA protein		K0038_00581	K06219			K0038_00598		helix_turn_helix, Arsenical Resistance Operon Repressor	2.70E-115	421.4	Pseudomonas syringae group		0					K
	K0038_00582	nucleotide pyrophosphohydrolase		K0038_00582				K0038_00599	add	Catalyzes the hydrolytic deamination of adenine to hypoxanthine. Plays an important role in the purine salvage pathway and in nitrogen catabolism	1.40E-183	648.7	Pseudomonas syringae group	EC:3.5.4.2; EC:3.5.4.4	0			K01488,K21053	map00230,map01100,map05340	F
	K0038_00583	acyl dehydratase		K0038_00583				K0038_00600		Belongs to the iron ascorbate-dependent oxidoreductase family	2.00E-185	654.8	Pseudomonas syringae group		0					C
	K0038_00584	oxidoreductase, short chain dehydrogenase/reductase family		K0038_00584	K00059			K0038_00601		ABC transporter substrate-binding protein PnrA-like	2.50E-211	741.1	Pseudomonas syringae group		0			K02058,K07335		S
	K0038_00585	thiolase family protein		K0038_00585	K00626			K0038_00602	fecE	P-loop containing region of AAA domain	2.10E-143	515	Pseudomonas syringae group	EC:3.6.3.34	2	F:GO:0005524; C:GO:0005886	F:ATP binding; C:plasma membrane	K02013	map02010	HP
	K0038_00586	protein of unknown function		K0038_00586				K0038_00603	fecD	Belongs to the binding-protein-dependent transport system permease family. FecCD subfamily	1.20E-156	559.3	Pseudomonas syringae group		4	P:GO:0033214; F:GO:0015603; C:GO:0005886; P:GO:0055085	P:siderophore-dependent iron import into cell; P:transmembrane transport; F:iron chelate transmembrane transporter activity; C:plasma membrane	K02015	map02010	P
	K0038_00587	hypothetical protein		K0038_00587				K0038_00604	fecC	Belongs to the binding-protein-dependent transport system permease family. FecCD subfamily	6.10E-169	600.1	Pseudomonas syringae group		4	P:GO:0033214; F:GO:0015603; C:GO:0005886; P:GO:0055085	P:siderophore-dependent iron import into cell; P:transmembrane transport; F:iron chelate transmembrane transporter activity; C:plasma membrane	K02015	map02010	P
	K0038_00588	transporter		K0038_00588	K14347			K0038_00605	fecB	Periplasmic binding protein	2.60E-166	591.3	Pseudomonas syringae group		3	P:GO:0033214; C:GO:0030288; P:GO:0010039	P:response to iron ion; P:siderophore-dependent iron import into cell; C:outer membrane-bounded periplasmic space	K02016	map02010	P
	K0038_00589	transcriptional regulator, AraC family		K0038_00589				K0038_00606	chaA	Sodium/calcium exchanger protein	5.00E-188	663.7	Pseudomonas syringae group		0			K07300		P
	K0038_00590	serine protein kinase RIO		K0038_00590	K07178			K0038_00607	atzB	Amidohydrolase family	1.80E-251	874.8	Pseudomonas syringae group	EC:3.5.4.32	0			K18456		F
	K0038_00591	Cu(I)-responsive transcriptional regulator		K0038_00591	K19591			K0038_00608		short-chain	2.60E-118	431.4	Pseudomonas syringae group		0					IQ
	K0038_00592	copper-translocating P-type ATPase		K0038_00592	K17686			K0038_00609	rbsC-2	Belongs to the binding-protein-dependent transport system permease family	1.40E-159	568.9	Pseudomonas syringae group		0			K02057		P
	K0038_00593	hypothetical protein		K0038_00593				K0038_00610	IV02_22040	Belongs to the binding-protein-dependent transport system permease family	7.20E-195	686.4	Pseudomonas syringae group		0			K02057		P
	K0038_00594	copper resistance protein CopZ		K0038_00594	K07213			K0038_00611		ABC transporter, ATP-binding protein	2.80E-277	960.7	Pseudomonas syringae group	EC:3.6.3.17	0			K02056		S
	K0038_00595	drug resistance transporter, Bcr/CflA family protein		K0038_00595	K07552			K0038_00612	yigZ	Thymidylate synthase	2.80E-100	371.3	Pseudomonas syringae group	EC:2.1.1.45; EC:3.4.13.9	0			K00560,K01271	map00240,map00670,map01100,map01523	S
	K0038_00596	alcohol dehydrogenase, zinc-containing protein		K0038_00596				K0038_00613	rutR	Transcriptional regulator	1.40E-121	442.2	Pseudomonas syringae group		0			K09017		K
	K0038_00597	LysR family transcriptional regulator		K0038_00597				K0038_00614	pbuX	Permease family	2.40E-243	847.8	Pseudomonas syringae group		4	P:GO:1904823; P:GO:0042906; C:GO:0005887; F:GO:0042907	C:integral component of plasma membrane; F:xanthine transmembrane transporter activity; P:xanthine transport; P:purine nucleobase transmembrane transport	K02824,K03458,K16345,K16346		F
	K0038_00598	transcriptional regulator, putative		K0038_00598				K0038_00616	bauR	Transcriptional regulator	6.90E-167	593.2	Pseudomonas syringae group		0			K21699		K
	K0038_00599	adenosine deaminase		K0038_00599	K21053			K0038_00617	bioA2	Belongs to the class-III pyridoxal-phosphate-dependent aminotransferase family	3.10E-256	890.6	Pseudomonas syringae group	EC:2.6.1.18	0			K00822	map00280,map00410,map00640,map01100	H
	K0038_00600	oxidoreductase, 2OG-Fe(II) oxygenase family		K0038_00600				K0038_00618	mmsA	Aldehyde dehydrogenase family	1.90E-286	991.1	Pseudomonas syringae group	EC:1.2.1.27; EC:1.2.1.18	0			K00140	map00280,map00410,map00562,map00640,map01100,map01200	C
	K0038_00601	bmp family protein		K0038_00601	K07335			K0038_00619	recC	A helicase nuclease that prepares dsDNA breaks (DSB) for recombinational DNA repair. Binds to DSBs and unwinds DNA via a highly rapid and processive ATP-dependent bidirectional helicase activity. Unwinds dsDNA until it encounters a Chi (crossover hotspot instigator) sequence from the 3' direction. Cuts ssDNA a few nucleotides 3' to the Chi site. The properties and activities of the enzyme are cha…	0.00E0	2237.6	Pseudomonas syringae group	EC:3.1.11.5	11	F:GO:0016887; F:GO:0003678; P:GO:0009314; P:GO:0000724; P:GO:0044355; C:GO:0009338; C:GO:0005622; F:GO:0008854; P:GO:0032508; P:GO:0090305; F:GO:0004519	P:response to radiation; P:double-strand break repair via homologous recombination; P:nucleic acid phosphodiester bond hydrolysis; F:exodeoxyribonuclease V activity; F:DNA helicase activity; P:clearance of foreign intracellular DNA; F:ATP hydrolysis activity; C:intracellular anatomical structure; C:exodeoxyribonuclease V complex; F:endonuclease activity; P:DNA duplex unwinding	K03583	map03440	L
	K0038_00602	iron(III) dicitrate transport system, ATP-binding protein FecE		K0038_00602	K23184			K0038_00620	recB	A helicase nuclease that prepares dsDNA breaks (DSB) for recombinational DNA repair. Binds to DSBs and unwinds DNA via a highly rapid and processive ATP-dependent bidirectional helicase activity. Unwinds dsDNA until it encounters a Chi (crossover hotspot instigator) sequence from the 3' direction. Cuts ssDNA a few nucleotides 3' to the Chi site. The properties and activities of the enzyme are cha…	0.00E0	2306.6	Pseudomonas syringae group	EC:3.6.4.12; EC:3.1.11.5	13	F:GO:0005524; P:GO:0009314; F:GO:0003678; F:GO:0004520; F:GO:0008854; F:GO:0016887; P:GO:0000724; P:GO:0044355; C:GO:0009338; C:GO:0005622; P:GO:0032508; F:GO:0015616; P:GO:0090305	P:response to radiation; F:DNA helicase activity; F:ATP hydrolysis activity; F:endodeoxyribonuclease activity; P:DNA duplex unwinding; F:DNA translocase activity; P:double-strand break repair via homologous recombination; P:nucleic acid phosphodiester bond hydrolysis; F:exodeoxyribonuclease V activity; P:clearance of foreign intracellular DNA; C:intracellular anatomical structure; C:exodeoxyribon…	K03582,K16898	map03440	L
	K0038_00603	iron(III) dicitrate transport system, permease protein FecD		K0038_00603	K23182			K0038_00621	recD	A helicase nuclease that prepares dsDNA breaks (DSB) for recombinational DNA repair. Binds to DSBs and unwinds DNA via a highly rapid and processive ATP-dependent bidirectional helicase activity. Unwinds dsDNA until it encounters a Chi (crossover hotspot instigator) sequence from the 3' direction. Cuts ssDNA a few nucleotides 3' to the Chi site. The properties and activities of the enzyme are cha…	0.00E0	1282.7	Pseudomonas syringae group	EC:3.1.11.5	8	F:GO:0016887; F:GO:0005524; P:GO:0000724; C:GO:0009338; C:GO:0005622; F:GO:0017116; F:GO:0008854; P:GO:0090305	P:double-strand break repair via homologous recombination; P:nucleic acid phosphodiester bond hydrolysis; F:exodeoxyribonuclease V activity; F:single-stranded DNA helicase activity; F:ATP hydrolysis activity; C:intracellular anatomical structure; C:exodeoxyribonuclease V complex; F:ATP binding	K03581	map03440	L
	K0038_00604	transport system permease protein		K0038_00604	K23183			K0038_00622		Belongs to the 'phage' integrase family	1.60E-74	287	Gammaproteobacteria		0					L
	K0038_00605	iron(III) dicitrate transport system, periplasmic iron-binding protein FecB		K0038_00605	K23181			K0038_00623		AAA ATPase domain	1.70E-158	565.8	Proteobacteria		0					S
	K0038_00606	Sodium/calcium exchanger membrane region		K0038_00606	K07300			K0038_00625		COG1961 Site-specific recombinases, DNA invertase Pin homologs	6.10E-52	210.7	Gammaproteobacteria		0					L
	K0038_00607	hydroxydechloroatrazine ethylaminohydrolase		K0038_00607	K18456			K0038_00626			4.70E-1	40.8	Podoviridae		0
	K0038_00608	SDR family oxidoreductase		K0038_00608				K0038_00628	ant	BRO family, N-terminal domain	2.00E-9	69.7	Bacteria		0					K
	K0038_00609	nucleoside ABC transporter membrane protein		K0038_00609	K23536			K0038_00631			1.20E-88	333.6	Bacteria		0
	K0038_00610	ABC transporter, permease protein, putative		K0038_00610	K23535			K0038_00632			5.20E-11	74.3	Bacteria		0
	K0038_00611	ABC transporter, ATP-binding protein		K0038_00611	K23537			K0038_00633		Protein tyrosine kinase	3.30E-86	325.5	Bacteroidia		0					KLT
	K0038_00612	hypothetical protein		K0038_00612				K0038_00634		Transcriptional regulator	1.00E-168	599.4	Pseudomonas syringae group		0					K
	K0038_00613	transcriptional regulator, TetR family		K0038_00613	K09017			K0038_00635	mmsA	Aldehyde dehydrogenase family	7.00E-273	946	Pseudomonas syringae group	EC:1.2.1.27; EC:1.2.1.18	0			K00140	map00280,map00410,map00562,map00640,map01100,map01200	C
	K0038_00614	xanthine permease XanP		K0038_00614	K16345			K0038_00636	mmsB	Belongs to the 3-hydroxyisobutyrate dehydrogenase family	6.80E-151	540	Pseudomonas syringae group	EC:1.1.1.31	0			K00020	map00280,map01100	I
	K0038_00615	hypothetical protein		K0038_00615				K0038_00637	ggt	Gamma-glutamyltranspeptidase	0.00E0	1131.7	Pseudomonas syringae group	EC:2.3.2.2; EC:3.4.19.13	6	P:GO:0043102; C:GO:0030288; F:GO:0008238; F:GO:0034722; P:GO:0097264; F:GO:0036374	P:self proteolysis; F:glutathione hydrolase activity; F:gamma-glutamyl-peptidase activity; F:exopeptidase activity; P:amino acid salvage; C:outer membrane-bounded periplasmic space	K00681	map00430,map00460,map00480,map01100	M
	K0038_00616	transcriptional regulator, LysR family		K0038_00616	K21699			K0038_00638	phnE	Binding-protein-dependent transport system inner membrane component	9.10E-104	383.3	Pseudomonas syringae group	EC:3.6.1.63	0			K02042,K06162	map00440,map02010	P
	K0038_00617	beta-alanine--pyruvate aminotransferase		K0038_00617	K00822			K0038_00639	phnE	Binding-protein-dependent transport system inner membrane component	3.30E-136	491.1	Pseudomonas syringae group	EC:3.6.1.63	0			K02042,K06162	map00440,map02010	P
	K0038_00618	methylmalonate-semialdehyde dehydrogenase (acylating)		K0038_00618	K00140			K0038_00640	phnC	Part of the ABC transporter complex PhnCDE involved in phosphonates import. Responsible for energy coupling to the transport system	1.90E-136	491.9	Pseudomonas syringae group	EC:3.6.3.28	0			K02041	map02010	P
	K0038_00619	exodeoxyribonuclease V, gamma subunit		K0038_00619	K03583			K0038_00641	phnD	ABC-type phosphate phosphonate transport system periplasmic component	2.40E-153	548.1	Pseudomonas syringae group		0			K02044	map02010	P
	K0038_00620	exodeoxyribonuclease V, beta subunit		K0038_00620	K03582			K0038_00642	selD	Synthesizes selenophosphate from selenide and ATP	1.80E-195	688.3	Pseudomonas syringae group	EC:2.7.9.3	6	F:GO:0000287; P:GO:0016310; F:GO:0004756; P:GO:0016260; C:GO:0005829; P:GO:0070329	F:magnesium ion binding; F:selenide, water dikinase activity; P:tRNA seleno-modification; P:phosphorylation; P:selenocysteine biosynthetic process; C:cytosol	K01008	map00450,map01100	F
	K0038_00621	exodeoxyribonuclease V subunit alpha		K0038_00621	K03581			K0038_00643	selU	Catalyzes the transfer of selenium from selenophosphate for conversion of 2-thiouridine to 2-selenouridine at the wobble position in tRNA	4.20E-203	713.8	Pseudomonas syringae group		3	P:GO:0002098; F:GO:0043828; P:GO:0070329	P:tRNA seleno-modification; P:tRNA wobble uridine modification; F:tRNA 2-selenouridine synthase activity	K06917		H
	K0038_00622	tyrosine-type recombinase/integrase		K0038_00622				K0038_00644	MA20_06400	membrane transporter protein	5.30E-104	384	Pseudomonas syringae group		0			K07090		S
	K0038_00623	ATP-binding protein		K0038_00623				K0038_00645	ispB	Belongs to the FPP GGPP synthase family	1.20E-172	612.5	Pseudomonas syringae group	EC:2.5.1.90; EC:2.5.1.30	5	F:GO:0042802; P:GO:0016094; F:GO:0004659; C:GO:0005829; P:GO:0006744	P:polyprenol biosynthetic process; F:prenyltransferase activity; F:identical protein binding; P:ubiquinone biosynthetic process; C:cytosol	K00805,K02523	map00900,map01110	H
	K0038_00624	hypothetical protein		K0038_00624				K0038_00646	rplU	This protein binds to 23S rRNA in the presence of protein L20	1.10E-50	205.7	Pseudomonas syringae group		5	P:GO:0006412; C:GO:0022625; C:GO:0005886; F:GO:0003735; P:GO:0040007	F:structural constituent of ribosome; P:growth; C:cytosolic large ribosomal subunit; P:translation; C:plasma membrane	K02888	map03010	J
	K0038_00625	recombinase family protein		K0038_00625	K14060			K0038_00647	rpmA	Belongs to the bacterial ribosomal protein bL27 family	4.90E-44	183.3	Pseudomonas syringae group		11	P:GO:0042256; P:GO:0006412; C:GO:0022625; C:GO:0005886; P:GO:0090070; P:GO:0001558; F:GO:0003735; C:GO:0005618; P:GO:0000027; P:GO:1902626; F:GO:0043022	P:assembly of large subunit precursor of preribosome; P:mature ribosome assembly; P:regulation of cell growth; C:cell wall; F:structural constituent of ribosome; P:positive regulation of ribosome biogenesis; C:cytosolic large ribosomal subunit; F:ribosome binding; P:ribosomal large subunit assembly; P:translation; C:plasma membrane	K02899	map03010	J
	K0038_00626	hypothetical protein		K0038_00626				K0038_00648	obg	An essential GTPase which binds GTP, GDP and possibly (p)ppGpp with moderate affinity, with high nucleotide exchange rates and a fairly low GTP hydrolysis rate. Plays a role in control of the cell cycle, stress response, ribosome biogenesis and in those bacteria that undergo differentiation, in morphogenesis control	2.20E-221	774.6	Pseudomonas syringae group		11	F:GO:0005525; P:GO:0042255; P:GO:0007059; P:GO:0022618; F:GO:0019003; F:GO:0043023; P:GO:0090071; F:GO:0032550; F:GO:0003924; P:GO:0022611; C:GO:0005829	P:negative regulation of ribosome biogenesis; P:ribosome assembly; F:GDP binding; F:ribosomal large subunit binding; F:purine ribonucleoside binding; P:dormancy process; P:ribonucleoprotein complex assembly; F:GTP binding; F:GTPase activity; P:chromosome segregation; C:cytosol	K03979		S
	K0038_00627	hypothetical protein		K0038_00627				K0038_00649	proB	Catalyzes the transfer of a phosphate group to glutamate to form L-glutamate 5-phosphate	2.80E-202	711.1	Pseudomonas syringae group	EC:2.7.2.11	0			K00931	map00330,map00332,map01100,map01130,map01230	F
	K0038_00628	KilA-N domain-containing protein		K0038_00628				K0038_00650	creA	CreA protein	6.40E-76	290	Pseudomonas syringae group		1	C:GO:0005829	C:cytosol	K05805		S
	K0038_00629	hypothetical protein		K0038_00629				K0038_00651	rpsT	Binds directly to 16S ribosomal RNA	2.20E-39	167.9	Pseudomonas syringae group		8	F:GO:0008073; P:GO:0006412; F:GO:0070181; P:GO:0043086; C:GO:0022627; F:GO:0003735; P:GO:0000028; P:GO:0040007	F:small ribosomal subunit rRNA binding; F:structural constituent of ribosome; P:growth; F:ornithine decarboxylase inhibitor activity; P:ribosomal small subunit assembly; P:translation; P:negative regulation of catalytic activity; C:cytosolic small ribosomal subunit	K02968	map03010	J
	K0038_00630	hypothetical protein		K0038_00630				K0038_00652	murJ	Involved in peptidoglycan biosynthesis. Transports lipid-linked peptidoglycan precursors from the inner to the outer leaflet of the cytoplasmic membrane	3.40E-275	953.7	Pseudomonas syringae group		6	P:GO:0034203; C:GO:0005887; P:GO:0055085; P:GO:0009252; P:GO:0015836; F:GO:0015648	C:integral component of plasma membrane; F:lipid-linked peptidoglycan transporter activity; P:peptidoglycan biosynthetic process; P:glycolipid translocation; P:transmembrane transport; P:lipid-linked peptidoglycan transport	K03980		S
	K0038_00631	hypothetical protein		K0038_00631				K0038_00653	ribF	Belongs to the ribF family	3.70E-171	607.4	Pseudomonas syringae group	EC:2.7.1.26; EC:2.7.7.2	3	P:GO:0016310; F:GO:0003919; F:GO:0008531	F:FMN adenylyltransferase activity; P:phosphorylation; F:riboflavin kinase activity	K11753	map00740,map01100,map01110	H
	K0038_00632	hypothetical protein		K0038_00632				K0038_00654	ileS	amino acids such as valine, to avoid such errors it has two additional distinct tRNA(Ile)-dependent editing activities. One activity is designated as 'pretransfer' editing and involves the hydrolysis of activated Val-AMP. The other activity is designated 'posttransfer' editing and involves deacylation of mischarged Val-tRNA(Ile)	0.00E0	1916.7	Pseudomonas syringae group	EC:6.1.1.5	4	F:GO:0008270; F:GO:0004822; P:GO:0006428; C:GO:0005829	P:isoleucyl-tRNA aminoacylation; F:zinc ion binding; F:isoleucine-tRNA ligase activity; C:cytosol	K01870	map00970	J
	K0038_00633	protein kinase family protein		K0038_00633				K0038_00655	lspA	This protein specifically catalyzes the removal of signal peptides from prolipoproteins	3.80E-90	337.4	Pseudomonas syringae group	EC:3.4.23.36	0			K03101	map03060	M
	K0038_00634	transcriptional regulator, LysR family		K0038_00634				K0038_00656	fkpB	Peptidyl-prolyl cis-trans	8.80E-81	306.2	Pseudomonas syringae group	EC:5.2.1.8	4	F:GO:0003755; P:GO:0061077; P:GO:0000413; C:GO:0005829	P:protein peptidyl-prolyl isomerization; P:chaperone-mediated protein folding; F:peptidyl-prolyl cis-trans isomerase activity; C:cytosol	K03774,K03775		G
	K0038_00635	Methylmalonate-semialdehyde dehydrogenase [acylating], mitochondrial		K0038_00635	K00140			K0038_00657	ispH	Catalyzes the conversion of 1-hydroxy-2-methyl-2-(E)- butenyl 4-diphosphate (HMBPP) into a mixture of isopentenyl diphosphate (IPP) and dimethylallyl diphosphate (DMAPP). Acts in the terminal step of the DOXP MEP pathway for isoprenoid precursor biosynthesis	2.50E-175	621.3	Pseudomonas syringae group	EC:1.17.7.4; EC:2.7.4.25	4	F:GO:0042380; P:GO:0019288; F:GO:0051538; C:GO:0005829	P:isopentenyl diphosphate biosynthetic process, methylerythritol 4-phosphate pathway; F:hydroxymethylbutenyl pyrophosphate reductase activity; F:3 iron, 4 sulfur cluster binding; C:cytosol	K00945,K02945,K03527	map00240,map00900,map01100,map01110,map01130,map03010	IM
	K0038_00636	3-hydroxyisobutyrate dehydrogenase		K0038_00636	K00020			K0038_00658	fimT	Type II transport protein GspH	3.90E-79	300.8	Pseudomonas syringae group		0			K08084,K08085		NU
	K0038_00637	Gamma-glutamyltranspeptidase		K0038_00637	K00681			K0038_00659	VP0657	Type II transport protein GspH	3.50E-61	241.1	Pseudomonas syringae group		0			K02457,K02672,K08084,K08085	map03070,map05111	NU
	K0038_00638	phosphonate ABC transporter, permease protein PhnE		K0038_00638	K02042			K0038_00660	pilV	Prokaryotic N-terminal methylation motif	6.10E-67	260.4	Pseudomonas syringae group		0			K02671		NU
	K0038_00639	ABC transporter permease		K0038_00639	K02042			K0038_00661	pilW	Prokaryotic N-terminal methylation motif	1.20E-105	389.4	Gammaproteobacteria		0			K02672		NU
	K0038_00640	phosphonate ABC transporter, ATP-binding protein, putative		K0038_00640	K02041			K0038_00662	pilX	PilX N-terminal	1.40E-59	235.7	Pseudomonas syringae group		0			K02673		NU
	K0038_00641	phosphonate ABC transporter, periplasmic phosphonate-binding protein, putative		K0038_00641	K02044			K0038_00663	pilY1-1	Neisseria PilC beta-propeller domain	0.00E0	1907.9	Pseudomonas syringae group		0			K02674		NU
	K0038_00642	Selenide, water dikinase		K0038_00642	K01008			K0038_00664	pilE	Type IV pilus biogenesis protein	7.30E-36	156.8	Pseudomonas syringae group		0			K02655		NU
	K0038_00643	tRNA 2-selenouridine synthase		K0038_00643	K06917			K0038_00665	thiO	FAD dependent oxidoreductase	2.00E-197	694.9	Pseudomonas syringae group	EC:1.4.3.19	5	F:GO:0071949; P:GO:0009228; P:GO:0006520; F:GO:0043799; P:GO:0006805	P:thiamine biosynthetic process; F:glycine oxidase activity; F:FAD binding; P:xenobiotic metabolic process; P:cellular amino acid metabolic process	K03153	map00730,map01100	E
	K0038_00644	sulfite exporter TauE/SafE family protein		K0038_00644	K07090			K0038_00666	czcA	Belongs to the resistance-nodulation-cell division (RND) (TC 2.A.6) family	0.00E0	1865.5	Pseudomonas syringae group		0			K18303,K21134		V
	K0038_00645	octylprenyl diphosphate synthase		K0038_00645	K02523			K0038_00667		Belongs to the membrane fusion protein (MFP) (TC 8.A.1) family	3.20E-166	591.3	Pseudomonas syringae group		0			K18302,K21136,K21137		M
	K0038_00646	ribosomal protein L21		K0038_00646	K02888			K0038_00668	ameR	Transcriptional regulator	6.80E-102	376.7	Pseudomonas syringae group		0					K
	K0038_00647	ribosomal protein L27		K0038_00647	K02899			K0038_00669	pilR	fimbriae expression regulatory protein pilR	1.10E-245	855.5	Pseudomonas syringae group		0			K02667	map02020	T
	K0038_00648	GTP-binding protein, GTP1/Obg family		K0038_00648	K03979			K0038_00670		PhoQ Sensor	8.40E-269	932.6	Pseudomonas syringae group		0					T
	K0038_00649	Glutamate 5-kinase		K0038_00649	K00931			K0038_00671			4.30E-36	156.8	Pseudomonas syringae group		0			K06950
	K0038_00650	creA protein		K0038_00650	K05805			K0038_00672	bamD	Part of the outer membrane protein assembly complex, which is involved in assembly and insertion of beta-barrel proteins into the outer membrane	2.50E-189	667.9	Pseudomonas syringae group		3	P:GO:0043165; P:GO:0051205; C:GO:1990063	P:Gram-negative-bacterium-type cell outer membrane assembly; P:protein insertion into membrane; C:Bam protein complex	K05807,K08309		M
	K0038_00651	SSU ribosomal protein S20p		K0038_00651	K02968			K0038_00673	rluD	Responsible for synthesis of pseudouridine from uracil	1.20E-180	639	Pseudomonas syringae group	EC:5.4.99.23; EC:5.4.99.28; EC:5.4.99.29	4	F:GO:0009982; P:GO:0000027; C:GO:0005829; P:GO:0000455	F:pseudouridine synthase activity; P:enzyme-directed rRNA pseudouridine synthesis; P:ribosomal large subunit assembly; C:cytosol	K06177,K06180		J
	K0038_00652	Virulence factor MVIN-like protein		K0038_00652	K03980			K0038_00674	yfiH	Belongs to the multicopper oxidase YfiH RL5 family	3.30E-127	461.1	Pseudomonas syringae group		0			K05810		S
	K0038_00653	riboflavin biosynthesis protein RibF		K0038_00653	K11753			K0038_00675	clpB	Part of a stress-induced multi-chaperone system, it is involved in the recovery of the cell from heat-induced damage, in cooperation with DnaK, DnaJ and GrpE	0.00E0	1575.1	Pseudomonas syringae group		4	F:GO:0016887; F:GO:0005524; F:GO:0031249; P:GO:0009408	F:ATP hydrolysis activity; F:ATP binding; P:response to heat; F:denatured protein binding	K03694,K03695	map04213	O
	K0038_00654	Isoleucine-tRNA ligase		K0038_00654	K01870			K0038_00680		PAAR repeat-containing protein	1.50E-74	285.8	Pseudomonas syringae group		0					S
	K0038_00655	lipoprotein signal peptidase		K0038_00655	K03101			K0038_00681			1.40E-122	446	Pseudomonas syringae group		0
	K0038_00656	peptidyl-prolyl cis-trans isomerase, FKBP-type		K0038_00656	K03774			K0038_00682		SNF2 family N-terminal domain	5.60E-20	103.6	Pseudomonas syringae group		0					KL
	K0038_00657	4-hydroxy-3-methylbut-2-enyl diphosphate reductase		K0038_00657	K03527			K0038_00683		acetyltransferase	2.90E-133	481.5	Gammaproteobacteria		0					K
	K0038_00658	hypothetical protein		K0038_00658	K08084			K0038_00684	puuB	oxidoreductase	2.20E-240	837.8	Gammaproteobacteria		0			K09471	map00330,map01100	E
	K0038_00659	pillin, putative		K0038_00659	K08085			K0038_00685		transcriptional regulator	1.50E-116	426	Gammaproteobacteria		0					K
	K0038_00660	protein of unknown function		K0038_00660	K02671			K0038_00686		Belongs to the short-chain dehydrogenases reductases (SDR) family	1.60E-86	325.9	Gammaproteobacteria		0					IQ
	K0038_00661	hypothetical protein		K0038_00661	K02672			K0038_00687		Domain of unknown function (DUF4157)	7.40E-41	174.9	Cytophagia		0					KLT
	K0038_00662	hypothetical protein		K0038_00662	K02673			K0038_00688		COG0654 2-polyprenyl-6-methoxyphenol hydroxylase and related FAD-dependent oxidoreductases	3.00E-191	674.5	Gammaproteobacteria		0					CH
	K0038_00663	pilus assembly protein		K0038_00663	K02674			K0038_00689		COG1020 Non-ribosomal peptide synthetase modules and related proteins	0.00E0	3016.9	Gammaproteobacteria		0					Q
	K0038_00664	type IV pilus biogenesis protein		K0038_00664	K02655			K0038_00691	rbtR	helix_turn _helix lactose operon repressor	2.10E-114	419.1	Rhizobiaceae	EC:3.2.1.26	0			K01193,K02529,K03435	map00052,map00500,map01100	K
	K0038_00665	glycine oxidase ThiO		K0038_00665	K03153			K0038_00692		Periplasmic binding protein domain	3.50E-141	508.1	Rhizobiaceae		0			K02058,K10543	map02010	G
	K0038_00666	AcrB/AcrD/AcrF family protein		K0038_00666				K0038_00693		ATPases associated with a variety of cellular activities	2.80E-103	381.7	Rhizobiaceae	EC:3.6.3.17	0			K02056,K10545	map02010	G
	K0038_00667	efflux transporter, RND family, MFP subunit		K0038_00667				K0038_00694		Belongs to the binding-protein-dependent transport system permease family	5.30E-162	577.4	Rhizobiaceae		0			K02057,K10544	map02010	G
	K0038_00668	transcriptional regulator, TetR family		K0038_00668				K0038_00695	rbtD	COG4221 Short-chain alcohol dehydrogenase of	4.60E-105	387.5	Rhizobiaceae	EC:1.1.1.56	0			K00039	map00040,map01100	S
	K0038_00669	type 4 fimbriae expression regulatory protein pilR		K0038_00669	K02667			K0038_00696	araB	FGGY family of carbohydrate kinases, C-terminal domain	1.80E-202	712.2	Rhizobiaceae	EC:2.7.1.47	4	F:GO:0019150; P:GO:0019321; P:GO:0070050; P:GO:0046835	P:pentose metabolic process; F:D-ribulokinase activity; P:neuron cellular homeostasis; P:carbohydrate phosphorylation	K00875	map00040,map01100	G
	K0038_00670	sensor protein PilS		K0038_00670	K02668			K0038_00697	infB	Autotransporter beta-domain	0.00E0	1634.4	Pseudomonas syringae group		0			K02519,K03646,K03832,K12685,K19231		M
	K0038_00671	MYND finger		K0038_00671	K06950			K0038_00698	fadL	Outer membrane protein transport protein (OMPP1/FadL/TodX)	2.70E-216	757.7	Pseudomonas syringae group		0			K06076		I
	K0038_00672	competence lipoprotein ComL		K0038_00672	K05807			K0038_00699			4.30E-86	323.9	Pseudomonas syringae group		0
	K0038_00673	ribosomal large subunit pseudouridine synthase D		K0038_00673	K06180			K0038_00700			2.60E-67	261.5	Pseudomonas syringae group		0
	K0038_00674	hypothetical protein		K0038_00674	K05810			K0038_00701		PhoQ Sensor	3.30E-276	957.2	Pseudomonas syringae group		0					T
	K0038_00675	ATP-dependent chaperone ClpB		K0038_00675	K03695			K0038_00702		DNA-binding response regulator, LuxR family	4.80E-103	380.6	Pseudomonas syringae group		0					K
	K0038_00680	PAAR domain-containing protein		K0038_00680				K0038_00703		PhoQ Sensor	4.60E-275	953.4	Pseudomonas syringae group		0					T
	K0038_00681	Hypothetical protein		K0038_00681				K0038_00704	cheB	catalyzes the demethylation of specific methylglutamate residues introduced into the chemoreceptors (methyl-accepting chemotaxis proteins) by CheR	8.40E-188	662.9	Pseudomonas syringae group	EC:3.5.1.44; EC:3.1.1.61	0			K03412	map02020,map02030	NT
	K0038_00682	Superfamily II DNA/RNA helicase, SNF2 family		K0038_00682				K0038_00705	cheD	Probably deamidates glutamine residues to glutamate on methyl-accepting chemotaxis receptors (MCPs), playing an important role in chemotaxis	3.00E-90	337.8	Pseudomonas syringae group	EC:3.5.1.44	0			K03411	map02030	NT
	K0038_00683	GNAT family N-acetyltransferase		K0038_00683				K0038_00706	cheR2	Methylation of the membrane-bound methyl-accepting chemotaxis proteins (MCP) to form gamma-glutamyl methyl ester residues in MCP	1.00E-145	522.7	Pseudomonas syringae group	EC:2.1.1.80	0			K00575	map02020,map02030	H
	K0038_00684	Glycine/D-amino acid oxidase		K0038_00684				K0038_00707	cheW3	Chemotaxis protein CheW	2.00E-89	335.1	Pseudomonas syringae group		0			K03408,K03415	map02020,map02030	NT
	K0038_00685	LysR family transcriptional regulator		K0038_00685				K0038_00708	cheD2	chemotaxis protein	2.50E-143	515.8	Pseudomonas syringae group		0			K03406	map02020,map02030	T
	K0038_00686	SDR family oxidoreductase		K0038_00686				K0038_00709	cheA2	Signal transducing histidine kinase, homodimeric domain	0.00E0	1257.3	Pseudomonas syringae group	EC:2.7.13.3	0			K03407	map02020,map02030	T
	K0038_00687	hypothetical protein		K0038_00687				K0038_00710		STAS domain	9.20E-41	172.6	Pseudomonas syringae group		0			K04749,K06378		T
	K0038_00688	2-polyprenyl-6-methoxyphenol hydroxylase		K0038_00688				K0038_00711		Chemotaxis protein CheY	8.00E-58	229.6	Pseudomonas syringae group		0					T
	K0038_00689	syringomycin synthetase protein SyrE		K0038_00689				K0038_00712		Methyl-accepting chemotaxis-like domains (chemotaxis sensory transducer).	8.30E-184	649.8	Pseudomonas syringae group		0			K03406	map02020,map02030	NT
	K0038_00690	hypothetical protein		K0038_00690				K0038_00713	ndh	NADH dehydrogenase	7.90E-233	812.8	Pseudomonas syringae group	EC:1.6.99.3	7	C:GO:0005886; C:GO:0030964; F:GO:0008137; P:GO:0009061; P:GO:0019646; P:GO:0055070; F:GO:0050660	F:flavin adenine dinucleotide binding; P:aerobic electron transport chain; P:copper ion homeostasis; P:anaerobic respiration; F:NADH dehydrogenase (ubiquinone) activity; C:NADH dehydrogenase complex; C:plasma membrane	K03885	map00190	C
	K0038_00691	LacI family DNA-binding transcriptional regulator		K0038_00691				K0038_00714		MOSC domain	5.40E-95	353.6	Pseudomonas syringae group		0					S
	K0038_00692	sugar ABC transporter substrate-binding protein		K0038_00692				K0038_00715	IV02_30430	Putative endonuclease, protein of unknown function (DUF1780)	1.90E-115	421.8	Pseudomonas syringae group		0					S
	K0038_00693	sugar ABC transporter ATP-binding protein		K0038_00693	K10441			K0038_00716			8.30E-76	289.7	Pseudomonas syringae group		0
	K0038_00694	ABC transporter permease		K0038_00694				K0038_00717		Sel1-like repeats.	5.40E-5	56.2	Oxalobacteraceae		0			K07126		M
	K0038_00695	SDR family oxidoreductase		K0038_00695				K0038_00719	yacG	Inhibits all the catalytic activities of DNA gyrase by preventing its interaction with DNA. Acts by binding directly to the C-terminal domain of GyrB, which probably disrupts DNA binding by the gyrase	1.60E-34	151.4	Pseudomonas syringae group	EC:2.7.1.24	5	F:GO:0008270; F:GO:0008657; P:GO:2000372; F:GO:0060589; P:GO:0051346	F:DNA topoisomerase type II (double strand cut, ATP-hydrolyzing) inhibitor activity; F:zinc ion binding; F:nucleoside-triphosphatase regulator activity; P:negative regulation of hydrolase activity; P:negative regulation of DNA topoisomerase (ATP-hydrolyzing) activity	K00859,K09862	map00770,map01100	S
	K0038_00696	FGGY-family carbohydrate kinase		K0038_00696				K0038_00720	coaE	Catalyzes the phosphorylation of the 3'-hydroxyl group of dephosphocoenzyme A to form coenzyme A	1.00E-105	389.4	Pseudomonas syringae group	EC:2.7.1.24	3	P:GO:0016310; P:GO:0015937; F:GO:0004140	F:dephospho-CoA kinase activity; P:phosphorylation; P:coenzyme A biosynthetic process	K00859	map00770,map01100	F
	K0038_00697	autotransporter		K0038_00697				K0038_00721	pilD	Cleaves type-4 fimbrial leader sequence and methylates the N-terminal (generally Phe) residue	3.90E-159	567.4	Pseudomonas syringae group	EC:3.4.23.43	0			K02464,K02654	map03070	M
	K0038_00698	outer membrane protein P1, putative		K0038_00698	K06076			K0038_00722	pilC	Type IV pilus biogenesis protein PilC	9.70E-201	706.1	Pseudomonas syringae group		4	P:GO:0002790; P:GO:0015628; C:GO:0005886; P:GO:0009297	P:protein secretion by the type II secretion system; P:peptide secretion; P:pilus assembly; C:plasma membrane	K02653		U
	K0038_00699	lipoprotein, putative		K0038_00699				K0038_00723	pilB	Type IV pilus biogenesis protein PilB	0.00E0	1080.5	Pseudomonas syringae group		0			K02652		NU
	K0038_00700	Beta-barrel assembly machine subunit BamE		K0038_00700				K0038_00724		HxlR-like helix-turn-helix	1.90E-53	214.9	Pseudomonas syringae group		0					K
	K0038_00701	sensor histidine kinase/response regulator		K0038_00701				K0038_00725	gst	Glutathione S-transferase	3.60E-103	380.9	Pseudomonas syringae group	EC:2.5.1.18	0			K00799	map00480,map00980,map00982,map00983,map01524,map05200,map05204,map05225,map05418	H
	K0038_00702	DNA-binding response regulator, LuxR family		K0038_00702				K0038_00726	VY92_10800	Protein of unknown function (DUF1523)	1.60E-94	352.1	Pseudomonas syringae group		0					S
	K0038_00703	hybrid sensor histidine kinase/response regulator		K0038_00703				K0038_00727		ATP-grasp in the biosynthetic pathway with Ter operon	7.80E-180	636.3	Pseudomonas syringae group		0					HJ
	K0038_00704	protein-glutamate methylesterase CheB		K0038_00704	K03412			K0038_00728	mucD	Trypsin-like serine protease	1.10E-209	735.7	Pseudomonas syringae group	EC:3.4.21.107	0			K04771,K07126	map01503,map02020	O
	K0038_00705	chemoreceptor glutamine deamidase CheD		K0038_00705	K03411			K0038_00730	apt	TRSP domain C terminus to PRTase_2	1.10E-206	725.7	Pseudomonas syringae group	EC:2.4.2.7; EC:2.4.2.22; EC:2.4.2.10	0			K00759,K00762,K03816	map00230,map00240,map01100,map01110	F
	K0038_00706	SAM-dependent methyltransferase		K0038_00706	K00575			K0038_00731		phosphatase activity	2.40E-141	508.1	Pseudomonas syringae group	EC:3.1.3.12	0			K01087	map00500,map01100	S
	K0038_00707	chemotaxis protein CheW		K0038_00707	K03408			K0038_00732	stiP	PELOTA RNA binding domain	1.50E-184	652.1	Pseudomonas syringae group		4	P:GO:0000902; P:GO:0016540; F:GO:0008234; P:GO:0032989	P:cellular component morphogenesis; P:protein autoprocessing; F:cysteine-type peptidase activity; P:cell morphogenesis	K07590	map03010	J
	K0038_00708	Histidine kinase, HAMP region:Bacterial chemotaxis sensory transducer		K0038_00708	K03406			K0038_00733		C-C_Bond_Lyase of the TIM-Barrel fold	3.70E-171	607.4	Pseudomonas syringae group		0					G
	K0038_00709	chemotaxis protein CheA		K0038_00709	K03407			K0038_00734	cicA	haloacid dehalogenase-like hydrolase	5.50E-130	470.3	Pseudomonas syringae group	EC:2.3.1.51; EC:3.1.3.27; EC:3.1.3.3	0			K00655,K01079,K18697	map00260,map00561,map00564,map00680,map01100,map01110,map01120,map01130,map01200,map01230	E
	K0038_00710	STAS domain-containing protein		K0038_00710	K04749			K0038_00735	terZ	Tellurium resistance protein TerZ	3.00E-107	394.4	Pseudomonas syringae group		0			K05791		T
	K0038_00711	chemotaxis protein CheY		K0038_00711	K03413			K0038_00736	terA	resistance protein TerA	2.10E-200	704.9	Pseudomonas syringae group	EC:5.1.1.3	0			K01776,K05792	map00471,map01100	T
	K0038_00712	chemotaxis protein		K0038_00712	K03406			K0038_00737	terB	resistance protein	1.90E-77	295	Pseudomonas syringae group		0			K05793,K05795		P
	K0038_00713	NADH dehydrogenase		K0038_00713	K03885			K0038_00738	terC	tellurium resistance	2.70E-183	647.9	Pseudomonas syringae group		0			K05794		P
	K0038_00714	MOSC domain-containing protein		K0038_00714				K0038_00739	terD	Tellurium resistance protein TerD	9.20E-101	372.9	Pseudomonas syringae group		0			K05795		T
	K0038_00715	hypothetical protein		K0038_00715				K0038_00740	terE	Tellurium resistance protein TerE	3.50E-100	370.9	Pseudomonas syringae group		0			K05795		T
	K0038_00716	hypothetical protein		K0038_00716				K0038_00741	ycbR	Tellurium resistance protein	2.90E-221	774.2	Pseudomonas syringae group		0					T
	K0038_00717	sel1 repeat family protein		K0038_00717	K07126			K0038_00742		Mitochondrial biogenesis AIM24	9.70E-176	622.9	Pseudomonas syringae group		0					S
	K0038_00718	putative membrane protein		K0038_00718				K0038_00743	nadC	Belongs to the NadC ModD family	1.80E-148	531.9	Pseudomonas syringae group	EC:2.4.2.19	6	P:GO:0042178; F:GO:0004514; P:GO:0034213; P:GO:0019674; P:GO:0034628; C:GO:0005829	F:nicotinate-nucleotide diphosphorylase (carboxylating) activity; P:'de novo' NAD biosynthetic process from aspartate; P:quinolinate catabolic process; P:xenobiotic catabolic process; P:NAD metabolic process; C:cytosol	K00767	map00760,map01100	H
	K0038_00719	hypothetical protein		K0038_00719	K09862			K0038_00744		Protein of unknown function (DUF1631)	0.00E0	1353.6	Pseudomonas syringae group		0					NU
	K0038_00720	dephospho-CoA kinase		K0038_00720	K00859			K0038_00745	ampD	Ami_2	1.40E-101	375.6	Pseudomonas syringae group	EC:3.5.1.28	7	F:GO:0009392; F:GO:0008270; F:GO:0008745; C:GO:0019867; P:GO:0009254; P:GO:0009253; C:GO:0005737	P:peptidoglycan catabolic process; C:outer membrane; F:N-acetyl-anhydromuramoyl-L-alanine amidase activity; C:cytoplasm; F:zinc ion binding; P:peptidoglycan turnover; F:N-acetylmuramoyl-L-alanine amidase activity	K03806		V
	K0038_00721	type 4 prepilin peptidase 1, Asparticpeptidase, MEROPS family A24A		K0038_00721	K02654			K0038_00746	ampE	COG3725 Membrane protein required for beta-lactamase induction	6.60E-140	503.4	Pseudomonas syringae group	EC:6.3.1.10	1	C:GO:0005887	C:integral component of plasma membrane	K02227,K03807	map00860,map01100	V
	K0038_00722	Type IV pilus biogenesis protein PilC		K0038_00722	K02653			K0038_00747	yjjV	TatD family	3.80E-137	494.2	Pseudomonas syringae group		0			K03424		L
	K0038_00723	type IV-A pilus assembly ATPase PilB		K0038_00723	K02652			K0038_00748	fruR	helix_turn _helix lactose operon repressor	2.00E-172	611.7	Pseudomonas syringae group	EC:3.2.1.26	10	P:GO:0034404; F:GO:0003677; P:GO:0019359; P:GO:0006355; P:GO:0009168; P:GO:0009166; P:GO:0006096; P:GO:0006805; P:GO:0006754; P:GO:0042866	P:ATP biosynthetic process; P:nicotinamide nucleotide biosynthetic process; P:pyruvate biosynthetic process; P:nucleobase-containing small molecule biosynthetic process; P:regulation of transcription, DNA-templated; F:DNA binding; P:glycolytic process; P:purine ribonucleoside monophosphate biosynthetic process; P:xenobiotic metabolic process; P:nucleotide catabolic process	K01193,K02529,K03435	map00052,map00500,map01100	K
	K0038_00724	helix-turn-helix transcriptional regulator		K0038_00724				K0038_00749	fruB	Belongs to the PEP-utilizing enzyme family	0.00E0	1674.8	Pseudomonas syringae group	EC:2.7.3.9; EC:2.7.1.202	5	P:GO:0032445; P:GO:0009401; C:GO:0019897; F:GO:0022877; F:GO:0090563	P:phosphoenolpyruvate-dependent sugar phosphotransferase system; F:protein-N(PI)-phosphohistidine-fructose phosphotransferase system transporter activity; C:extrinsic component of plasma membrane; P:fructose import; F:protein-phosphocysteine-sugar phosphotransferase activity	K02768,K02769,K02770,K08483,K11183,K11189	map00051,map01100,map01120,map02060	G
	K0038_00725	glutathione S-transferase		K0038_00725	K00799			K0038_00750	fruK	Belongs to the carbohydrate kinase PfkB family	1.90E-164	585.1	Pseudomonas syringae group	EC:2.7.1.56; EC:2.7.1.11	4	P:GO:0006001; F:GO:0008662; P:GO:0046835; C:GO:0005829	F:1-phosphofructokinase activity; P:carbohydrate phosphorylation; P:fructose catabolic process; C:cytosol	K00882,K16370	map00010,map00030,map00051,map00052,map00680,map01100,map01110,map01120,map01130,map01200,map01230	H
	K0038_00726	hypothetical protein		K0038_00726				K0038_00751	fruA	Phosphotransferase system fructose-specific	4.70E-273	946.8	Pseudomonas syringae group	EC:2.7.1.202	4	P:GO:0009401; C:GO:0005886; F:GO:0090582; P:GO:0034219	P:phosphoenolpyruvate-dependent sugar phosphotransferase system; P:carbohydrate transmembrane transport; F:protein-phosphocysteine-D-fructose-phosphotransferase system transporter activity; C:plasma membrane	K02768,K02769,K02770	map00051,map01100,map01120,map02060	G
	K0038_00727	carboxylate--amine ligase		K0038_00727				K0038_00752	atoB	Belongs to the thiolase family	1.30E-202	712.2	Pseudomonas syringae group	EC:2.3.1.9	0			K00626	map00071,map00072,map00280,map00310,map00362,map00380,map00620,map00630,map00640,map00650,map00720,map00900,map01100,map01110,map01120,map01130,map01200,map01212,map02020	I
	K0038_00728	trypsin domain protein		K0038_00728				K0038_00753		Uncharacterized protein conserved in bacteria (DUF2236)	8.60E-151	539.7	Pseudomonas syringae group		0					S
	K0038_00729	hypothetical protein		K0038_00729				K0038_00754	pgi	Glucose-6-phosphate isomerase	0.00E0	1125.9	Pseudomonas syringae group	EC:5.3.1.9	0			K01810	map00010,map00030,map00500,map00520,map01100,map01110,map01120,map01130,map01200	F
	K0038_00730	hypothetical protein		K0038_00730				K0038_00755	panC	Catalyzes the condensation of pantoate with beta-alanine in an ATP-dependent reaction via a pantoyl-adenylate intermediate	6.50E-143	513.5	Pseudomonas syringae group	EC:6.3.2.1	5	F:GO:0042802; P:GO:0006573; F:GO:0004592; P:GO:0015940; C:GO:0005829	P:valine metabolic process; P:pantothenate biosynthetic process; F:identical protein binding; C:cytosol; F:pantoate-beta-alanine ligase activity	K01918	map00410,map00770,map01100,map01110	H
	K0038_00731	hypothetical protein		K0038_00731				K0038_00756	panB	Catalyzes the reversible reaction in which hydroxymethyl group from 5,10-methylenetetrahydrofolate is transferred onto alpha-ketoisovalerate to form ketopantoate	2.80E-140	504.6	Pseudomonas syringae group	EC:2.1.2.11	0			K00606	map00770,map01100,map01110	H
	K0038_00732	Cysteine protease StiP		K0038_00732				K0038_00757	folK	7,8-dihydro-6-hydroxymethylpterin-pyrophosphokinase (HPPK)	5.10E-79	300.4	Pseudomonas syringae group	EC:4.1.2.25; EC:2.7.6.3	2	F:GO:0000287; F:GO:0003848	F:magnesium ion binding; F:2-amino-4-hydroxy-6-hydroxymethyldihydropteridine diphosphokinase activity	K00950,K13940	map00790,map01100	H
	K0038_00733	hypothetical protein		K0038_00733				K0038_00758	pcnB	Adds poly(A) tail to the 3' end of many RNAs, which usually targets these RNAs for decay. Plays a significant role in the global control of gene expression, through influencing the rate of transcript degradation, and in the general RNA quality control	5.50E-256	889.8	Pseudomonas syringae group	EC:2.7.7.72; EC:2.7.7.19	6	P:GO:0006378; F:GO:0003723; F:GO:0004652; P:GO:0006276; P:GO:0009451; C:GO:0005829	F:RNA binding; P:plasmid maintenance; P:RNA modification; P:mRNA polyadenylation; C:cytosol; F:polynucleotide adenylyltransferase activity	K00970,K00974	map03013,map03018	H
	K0038_00734	HAD-superfamily hydrolase, subfamily IB (PSPase-like):HAD-superfamily subfamily IB hydrolase, hypothetical 2		K0038_00734	K18697			K0038_00760	cbrB	response regulator	7.50E-261	906	Pseudomonas syringae group		0					T
	K0038_00735	tellurium resistance protein TerZ		K0038_00735	K05791			K0038_00761	cbrA	PAS domain	0.00E0	1885.5	Pseudomonas syringae group		0					T
	K0038_00736	tellurium resistance protein TerA		K0038_00736	K05792			K0038_00762	IV01_00620	MFS transporter	9.50E-25	118.6	Gammaproteobacteria		0					S
	K0038_00737	tellurium resistance protein TerB		K0038_00737	K05793			K0038_00763	gluQ	Catalyzes the tRNA-independent activation of glutamate in presence of ATP and the subsequent transfer of glutamate onto a tRNA(Asp). Glutamate is transferred on the 2-amino-5-(4,5- dihydroxy-2-cyclopenten-1-yl) moiety of the queuosine in the wobble position of the QUC anticodon	4.10E-164	583.9	Pseudomonas syringae group		3	P:GO:0002097; F:GO:0005524; F:GO:0008270	P:tRNA wobble base modification; F:zinc ion binding; F:ATP binding	K01894		J
	K0038_00738	tellurium resistance protein TerC		K0038_00738	K05794			K0038_00764	dksA	Transcription factor that acts by binding directly to the RNA polymerase (RNAP). Required for negative regulation of rRNA expression and positive regulation of several amino acid biosynthesis promoters. Also required for regulation of fis expression	1.50E-74	285.4	Pseudomonas syringae group		1	C:GO:0005829	C:cytosol	K06204	map02026	T
	K0038_00739	chemical-damaging agent resistance protein C		K0038_00739	K05795			K0038_00765	aspB	Aminotransferase	1.70E-218	765	Pseudomonas syringae group		0					E
	K0038_00740	tellurium resistance protein TerE		K0038_00740	K05795			K0038_00766	sfsA	Belongs to the SfsA family	1.80E-125	455.3	Pseudomonas syringae group		4	F:GO:0003677; P:GO:0010628; P:GO:0045893; P:GO:0005975	P:carbohydrate metabolic process; F:DNA binding; P:positive regulation of transcription, DNA-templated; P:positive regulation of gene expression	K06206		S
	K0038_00741	tellurium resistance protein, putative		K0038_00741				K0038_00767		Rieske [2Fe-2S] domain	7.40E-50	203	Pseudomonas syringae group	EC:2.7.1.3	0			K00846,K05710	map00051,map00360,map01100,map01120,map01220	P
	K0038_00742	TIGR00266 family protein		K0038_00742				K0038_00768	deoC	Catalyzes a reversible aldol reaction between acetaldehyde and D-glyceraldehyde 3-phosphate to generate 2-deoxy- D-ribose 5-phosphate	2.00E-119	435.3	Pseudomonas syringae group	EC:4.1.2.4	7	F:GO:0004139; P:GO:0034404; P:GO:0016052; P:GO:0015949; P:GO:0009264; P:GO:0006974; C:GO:0005829	P:cellular response to DNA damage stimulus; P:carbohydrate catabolic process; P:nucleobase-containing small molecule biosynthetic process; F:deoxyribose-phosphate aldolase activity; P:nucleobase-containing small molecule interconversion; P:deoxyribonucleotide catabolic process; C:cytosol	K01619	map00030	F
	K0038_00743	nicotinate-nucleotide pyrophosphorylase		K0038_00743	K00767			K0038_00770		Pentapeptide repeats (8 copies)	5.40E-24	117.1	Pseudomonas syringae group		0					S
	K0038_00744	hypothetical protein		K0038_00744				K0038_00771		protein conserved in bacteria	4.50E-243	847	Gammaproteobacteria		3	P:GO:0044764; F:GO:0046812; C:GO:0005618	C:cell wall; P:multi-organism cellular process; F:host cell surface binding	K07028		S
	K0038_00745	N-acetyl-anhydromuranmyl-L-alanine amidase		K0038_00745	K03806			K0038_00772	mrcB	Cell wall formation. Synthesis of cross-linked peptidoglycan from the lipid intermediates. The enzyme has a penicillin-insensitive transglycosylase N-terminal domain (formation of linear glycan strands) and a penicillin-sensitive transpeptidase C-terminal domain (cross-linking of the peptide subunits)	0.00E0	1538.9	Pseudomonas syringae group	EC:2.4.1.129; EC:3.4.16.4	0			K03814,K05365	map00550	M
	K0038_00746	regulatory signaling modulator protein AmpE		K0038_00746	K03807			K0038_00773	hemY	COG0457 FOG TPR repeat	5.70E-87	327.4	Pseudomonas syringae group		1	C:GO:0005886	C:plasma membrane	K02498		H
	K0038_00747	putative metal-dependent hydrolase YjjV		K0038_00747	K03424			K0038_00774	yqcC	tRNA pseudouridine synthase C	1.60E-52	211.8	Pseudomonas syringae group	EC:5.4.99.26; EC:5.1.3.13; EC:3.5.1.28	2	P:GO:0044764; P:GO:0044010	P:multi-organism cellular process; P:single-species biofilm formation	K01790,K03806,K06175	map00521,map00523,map01130	S
	K0038_00748	fructose repressor FruR, putative		K0038_00748	K03435			K0038_00775		Domain of unknown function (DUF4124)	1.40E-61	242.3	Pseudomonas syringae group		0					S
	K0038_00749	phosphoenolpyruvate--protein phosphotransferase		K0038_00749	K23993			K0038_00776	ilvI	Acetolactate synthase	0.00E0	1147.1	Pseudomonas syringae group	EC:2.2.1.6	6	F:GO:0030976; F:GO:0000287; F:GO:0003984; P:GO:0009099; P:GO:0009097; C:GO:0005829	F:magnesium ion binding; F:thiamine pyrophosphate binding; F:acetolactate synthase activity; P:valine biosynthetic process; P:isoleucine biosynthetic process; C:cytosol	K01652	map00290,map00650,map00660,map00770,map01100,map01110,map01130,map01210,map01230	H
	K0038_00750	1-phosphofructokinase		K0038_00750	K00882			K0038_00777	ilvH	Acetolactate synthase	2.20E-79	301.6	Pseudomonas syringae group	EC:2.2.1.6	5	F:GO:0003984; P:GO:0009099; P:GO:0009097; C:GO:0005948; C:GO:0005829	F:acetolactate synthase activity; P:valine biosynthetic process; P:isoleucine biosynthetic process; C:acetolactate synthase complex; C:cytosol	K01653	map00290,map00650,map00660,map00770,map01100,map01110,map01130,map01210,map01230	E
	K0038_00751	phosphotransferase system, fructose-specific IIBC component		K0038_00751	K02770			K0038_00778	ilvC	Involved in the biosynthesis of branched-chain amino acids (BCAA). Catalyzes an alkyl-migration followed by a ketol- acid reduction of (S)-2-acetolactate (S2AL) to yield (R)-2,3- dihydroxy-isovalerate. In the isomerase reaction, S2AL is rearranged via a Mg-dependent methyl migration to produce 3- hydroxy-3-methyl-2-ketobutyrate (HMKB). In the reductase reaction, this 2-ketoacid undergoes a metal-…	2.20E-190	671.4	Pseudomonas syringae group	EC:1.1.1.86	0			K00053	map00290,map00770,map01100,map01110,map01130,map01210,map01230	H
	K0038_00752	acetyl-CoA acetyltransferase		K0038_00752	K00626			K0038_00779	pssA	Belongs to the CDP-alcohol phosphatidyltransferase class-I family	7.90E-133	479.9	Pseudomonas syringae group	EC:2.7.8.8	1	C:GO:0005886	C:plasma membrane	K17103	map00260,map00564,map01100,map01110	I
	K0038_00753	hypothetical protein		K0038_00753				K0038_00780	msrP	Part of the MsrPQ system that repairs oxidized periplasmic proteins containing methionine sulfoxide residues (Met-O), using respiratory chain electrons. Thus protects these proteins from oxidative-stress damage caused by reactive species of oxygen and chlorine generated by the host defense mechanisms. MsrPQ is essential for the maintenance of envelope integrity under bleach stress, rescuing a wid…	4.50E-191	673.7	Pseudomonas syringae group		7	C:GO:0030288; F:GO:0016675; F:GO:0043546; P:GO:1901530; F:GO:0016672; P:GO:0001101; P:GO:0030091	P:protein repair; F:oxidoreductase activity, acting on a sulfur group of donors, quinone or similar compound as acceptor; P:response to hypochlorite; P:response to acid chemical; C:outer membrane-bounded periplasmic space; F:oxidoreductase activity, acting on a heme group of donors; F:molybdopterin cofactor binding	K07147		C
	K0038_00754	glucose-6-phosphate isomerase		K0038_00754	K01810			K0038_00781	msrQ	Part of the MsrPQ system that repairs oxidized periplasmic proteins containing methionine sulfoxide residues (Met-O), using respiratory chain electrons. Thus protects these proteins from oxidative-stress damage caused by reactive species of oxygen and chlorine generated by the host defense mechanisms. MsrPQ is essential for the maintenance of envelope integrity under bleach stress, rescuing a wid…	1.00E-105	389.4	Pseudomonas syringae group		5	F:GO:0016679; C:GO:0005887; F:GO:0020037; F:GO:0010181; P:GO:0030091	P:protein repair; C:integral component of plasma membrane; F:FMN binding; F:oxidoreductase activity, acting on diphenols and related substances as donors; F:heme binding	K17247		C
	K0038_00755	pantoate--beta-alanine ligase		K0038_00755	K01918			K0038_00782		Right handed beta helix region	4.20E-231	807	Pseudomonas syringae group	EC:4.2.2.2	0			K01728	map00040,map02024	M
	K0038_00756	3-methyl-2-oxobutanoate hydroxymethyltransferase		K0038_00756	K00606			K0038_00783	IV02_13110	chromosome	0.00E0	1726.5	Pseudomonas syringae group		0					D
	K0038_00757	2-amino-4-hydroxy-6- hydroxymethyldihydropteridine diphosphokinase		K0038_00757	K00950			K0038_00784	IV02_13115	Chromosome partitioning	7.00E-127	459.9	Pseudomonas syringae group		0					S
	K0038_00758	poly(A) polymerase		K0038_00758	K00970			K0038_00785	IV02_13120		1.00E-232	812.4	Pseudomonas syringae group		0
	K0038_00760	Two-component response regulator CbrB		K0038_00760	K07713			K0038_00786	tonB5	Energy transducer TonB	2.80E-119	434.9	Pseudomonas syringae group	EC:2.7.11.1	0			K03466,K08884		S
	K0038_00761	PAS domain S-box protein		K0038_00761				K0038_00787	rimI	This enzyme acetylates the N-terminal alanine of ribosomal protein S18	5.80E-82	310.1	Pseudomonas syringae group	EC:2.3.1.234; EC:2.3.1.128	3	P:GO:0017189; F:GO:0008999; C:GO:0005737	F:ribosomal-protein-alanine N-acetyltransferase activity; C:cytoplasm; P:N-terminal peptidyl-alanine acetylation	K01409,K03789,K14742		K
	K0038_00762	hypothetical protein		K0038_00762				K0038_00788			7.50E-65	253.1	Pseudomonas syringae group		0
	K0038_00763	tRNA synthetase domain protein		K0038_00763	K01894			K0038_00789	can	Reversible hydration of carbon dioxide	3.60E-122	444.1	Pseudomonas syringae group	EC:4.2.1.1	0			K01673	map00910	P
	K0038_00764	molecular chaperone DnaK		K0038_00764	K06204			K0038_00790		Methyl-accepting chemotaxis protein	1.20E-254	885.6	Pseudomonas syringae group		0			K03406	map02020,map02030	NT
	K0038_00765	aminotransferase, classes I and II		K0038_00765				K0038_00791	yedJ	Metal dependent phosphohydrolases with conserved 'HD' motif.	6.20E-101	373.6	Pseudomonas syringae group		0			K06950		S
	K0038_00766	DNA/RNA nuclease SfsA		K0038_00766	K06206			K0038_00792		Acyltransferase family	0.00E0	1096.6	Pseudomonas syringae group		0					M
	K0038_00767	Rieske 2Fe-2S domain-containing protein		K0038_00767				K0038_00793	phnA	PhnA Zinc-Ribbon	7.20E-45	186.4	Pseudomonas syringae group		1	C:GO:0005829	C:cytosol	K06193	map01120	P
	K0038_00768	deoxyribose-phosphate aldolase		K0038_00768	K01619			K0038_00794	yuxK	Protein of unknown function, DUF393	1.70E-75	288.5	Pseudomonas syringae group		0					S
	K0038_00770	pentapeptide repeat domain protein		K0038_00770				K0038_00795	sotB	Major facilitator Superfamily	1.70E-205	721.8	Pseudomonas syringae group		1	C:GO:0005886	C:plasma membrane	K03445,K08159		EGP
	K0038_00771	AAA family ATPase		K0038_00771	K07028			K0038_00796	pcs	Condenses choline with CDP-diglyceride to produce phosphatidylcholine and CMP	1.10E-130	472.6	Pseudomonas syringae group	EC:2.7.8.24; EC:2.7.8.8	3	F:GO:0042802; P:GO:0008654; F:GO:0050520	F:phosphatidylcholine synthase activity; P:phospholipid biosynthetic process; F:identical protein binding	K01004,K17103	map00260,map00564,map01100,map01110	I
	K0038_00772	penicillin-binding protein 1B		K0038_00772	K05365			K0038_00797		Isoleucyl-tRNA synthetase	0.00E0	1317.8	Pseudomonas syringae group		0					P
	K0038_00773	hypothetical protein		K0038_00773				K0038_00798		Tar ligand binding domain homologue	8.80E-197	693.3	Pseudomonas syringae group		0			K03406	map02020,map02030	NT
	K0038_00774	hypothetical protein		K0038_00774				K0038_00799		acetyltransferase	2.30E-75	288.1	Gammaproteobacteria		0					K
	K0038_00775	hypothetical protein		K0038_00775				K0038_00800	hmsT	diguanylate cyclase	5.60E-188	663.7	Pseudomonas syringae group	EC:2.7.7.65	0			K21022	map02025	T
	K0038_00776	acetolactate synthase		K0038_00776	K01652			K0038_00801	gmd	Catalyzes the conversion of GDP-D-mannose to GDP-4- dehydro-6-deoxy-D-mannose	4.20E-192	677.2	Pseudomonas syringae group	EC:4.2.1.47	0			K01711	map00051,map00520,map01100	M
	K0038_00777	acetolactate synthase 3 regulatory subunit		K0038_00777	K01653			K0038_00802		Polysaccharide biosynthesis protein	4.30E-151	540.8	Pseudomonas syringae group	EC:1.1.1.281; EC:5.1.3.2	0			K01784,K15856	map00051,map00052,map00520,map01100	M
	K0038_00778	ketol-acid reductoisomerase		K0038_00778	K00053			K0038_00803		chemotaxis protein	1.60E-228	798.5	Pseudomonas syringae group		0			K03406	map02020,map02030	NT
	K0038_00779	putative phosphatidyltransferase		K0038_00779	K17103			K0038_00804			1.10E-186	659.4	Pseudomonas syringae group		0
	K0038_00780	hypothetical protein		K0038_00780	K07147			K0038_00805		Bacterial SH3 domain	6.60E-127	460.3	Pseudomonas syringae group		0					M
	K0038_00781	protein-methionine-sulfoxide reductase heme-binding subunit MsrQ		K0038_00781	K17247			K0038_00806	ycaC	Isochorismatase family	2.10E-111	408.3	Pseudomonas syringae group		0					Q
	K0038_00782	Pectate lyase L precursor		K0038_00782				K0038_00807	phoD	Alkaline phosphatase	8.50E-290	1002.3	Pseudomonas syringae group	EC:3.1.3.1	0			K01113	map00790,map01100,map02020	P
	K0038_00783	chromosome partitioning protein ParA		K0038_00783				K0038_00808	rimL	Acetyltransferase (GNAT) domain	2.20E-86	325.1	Pseudomonas syringae group	EC:2.3.1.128	0			K03790		J
	K0038_00784	hypothetical protein		K0038_00784				K0038_00809		Biopolymer transport protein ExbD/TolR	2.20E-64	251.5	Pseudomonas syringae group		0			K03559,K03561		U
	K0038_00785	hypothetical protein		K0038_00785				K0038_00810	tonB2	Gram-negative bacterial TonB protein C-terminal	5.40E-64	251.1	Pseudomonas syringae group		0			K03832		M
	K0038_00786	energy transducer TonB		K0038_00786				K0038_00811		TonB dependent receptor	0.00E0	1514.2	Pseudomonas syringae group		0			K02014		M
	K0038_00787	ribosomal-protein-alanine acetyltransferase		K0038_00787	K03789			K0038_00812		MotA/TolQ/ExbB proton channel family	2.30E-108	398.3	Pseudomonas syringae group		0			K03561		U
	K0038_00788	hypothetical protein		K0038_00788				K0038_00813		Phospholipase D. Active site motifs.	3.90E-221	773.9	Pseudomonas syringae group		0			K06131	map00564,map01100	I
	K0038_00789	carbonic anhydrase		K0038_00789	K01673			K0038_00814	yhhY	Acetyltransferase (GNAT) domain	4.00E-73	280.8	Pseudomonas syringae group	EC:2.1.2.9	4	C:GO:0031248; P:GO:0006474; F:GO:0004596; C:GO:0005622	C:protein acetyltransferase complex; C:intracellular anatomical structure; F:peptide alpha-N-acetyltransferase activity; P:N-terminal protein amino acid acetylation	K00604,K03825	map00670,map00970	M
	K0038_00790	HAMP domain-containing protein		K0038_00790	K03406			K0038_00815	mltA	Murein-degrading enzyme. May play a role in recycling of muropeptides during cell elongation and or cell division	5.00E-218	763.5	Pseudomonas syringae group		6	C:GO:0009279; C:GO:0030288; F:GO:0004553; F:GO:0008933; C:GO:0005887; P:GO:0009253	C:integral component of plasma membrane; F:hydrolase activity, hydrolyzing O-glycosyl compounds; C:cell outer membrane; P:peptidoglycan catabolic process; F:lytic transglycosylase activity; C:outer membrane-bounded periplasmic space	K08304		M
	K0038_00791	HD domain-containing protein		K0038_00791	K06950			K0038_00816		RES	2.80E-76	291.2	Pseudomonas syringae group		0					S
	K0038_00792	acyltransferase family protein		K0038_00792				K0038_00817		Protein of unknown function (DUF2384)	1.70E-78	298.5	Pseudomonas syringae group		0					S
	K0038_00793	alkylphosphonate utilization protein		K0038_00793	K06193			K0038_00818	cheC	cheY-homologous receiver domain	6.20E-177	626.7	Pseudomonas syringae group		0			K03410	map02030	T
	K0038_00794	hypothetical protein		K0038_00794				K0038_00819	adrA	PAS fold	5.00E-84	317	Pseudomonas syringae group		0					T
	K0038_00795	putative sugar efflux transporter		K0038_00795	K08159			K0038_00820	aroA	Catalyzes the transfer of the enolpyruvyl moiety of phosphoenolpyruvate (PEP) to the 5-hydroxyl of shikimate-3- phosphate (S3P) to produce enolpyruvyl shikimate-3-phosphate and inorganic phosphate	8.70E-229	799.3	Pseudomonas syringae group	EC:2.5.1.19	2	F:GO:0003866; P:GO:0009423	P:chorismate biosynthetic process; F:3-phosphoshikimate 1-carboxyvinyltransferase activity	K00800	map00400,map01100,map01110,map01130,map01230	E
	K0038_00796	CDP-alcohol phosphatidyltransferase family protein		K0038_00796	K01004			K0038_00821	chrR	ChrR Cupin-like domain	5.30E-108	397.1	Pseudomonas syringae group		0			K07167		T
	K0038_00797	alkaline phosphatase family protein		K0038_00797				K0038_00822	sigK	Belongs to the sigma-70 factor family. ECF subfamily	2.70E-103	381.3	Pseudomonas syringae group		0			K03088		K
	K0038_00798	HAMP domain-containing protein		K0038_00798	K03406			K0038_00823		Aldose 1-epimerase	7.00E-153	546.6	Pseudomonas syringae group	EC:5.1.3.3	0			K01785	map00010,map00052,map01100,map01110,map01120,map01130	G
	K0038_00799	GNAT family N-acetyltransferase		K0038_00799				K0038_00824		EamA-like transporter family	4.20E-162	577.4	Pseudomonas syringae group		0					EG
	K0038_00800	diguanylate cyclase		K0038_00800				K0038_00825	dctM	Tripartite ATP-independent periplasmic transporter, DctM component	6.40E-203	713.4	Pseudomonas syringae group		0					G
	K0038_00801	GDP-mannose 4,6-dehydratase		K0038_00801	K01711			K0038_00826	dctQ	Tripartite ATP-independent periplasmic transporters, DctQ component	1.20E-86	325.9	Pseudomonas syringae group		0			K11689	map02020	G
	K0038_00802	GDP-6-deoxy-D-lyxo-4-hexulose reductase		K0038_00802	K15856			K0038_00827	yiaO	Bacterial extracellular solute-binding protein, family 7	2.60E-183	647.9	Pseudomonas syringae group		0					G
	K0038_00803	methyl-accepting chemotaxis protein		K0038_00803	K03406			K0038_00828	drp35	SMP-30/Gluconolaconase/LRE-like region	7.90E-160	569.7	Pseudomonas syringae group	EC:3.1.1.17	1	C:GO:0005576	C:extracellular region	K01053,K02352	map00030,map00053,map00930,map01100,map01110,map01120,map01130,map01200,map01220	G
	K0038_00804	membrane protein, putative		K0038_00804				K0038_00829	udh	Male sterility protein	5.70E-144	516.9	Pseudomonas syringae group	EC:1.1.1.203; EC:1.1.1.388	2	F:GO:0050388; P:GO:0008152	F:uronate dehydrogenase activity; P:metabolic process	K18981,K19243	map00030,map00053,map01100,map01110,map01120,map01130,map01200	M
	K0038_00805	lipoprotein, putative		K0038_00805				K0038_00830		outer membrane porin, OprD family	4.10E-242	843.6	Pseudomonas syringae group		0					S
	K0038_00806	putative hydrolase		K0038_00806				K0038_00831		Short chain dehydrogenase	2.10E-132	478.4	Pseudomonas syringae group		0					IQ
	K0038_00807	alkaline phosphatase		K0038_00807	K01113			K0038_00832		Methyl-accepting chemotaxis protein	2.10E-229	802	Pseudomonas syringae group		0			K03406	map02020,map02030	T
	K0038_00808	acetyltransferase, GNAT family		K0038_00808				K0038_00833		chemotaxis, protein	3.50E-274	950.7	Gammaproteobacteria		0			K03406	map02020,map02030	NT
	K0038_00809	TonB system transport protein		K0038_00809	K03559			K0038_00834		Domain present in phytochromes and cGMP-specific phosphodiesterases.	0.00E0	1755	Pseudomonas syringae group		0					T
	K0038_00810	biopolymer transporter TonB		K0038_00810	K03832			K0038_00835	phnD	ABC transporter, phosphonate, periplasmic substrate-binding protein	2.50E-147	528.1	Pseudomonas syringae group		0			K02044	map02010	P
	K0038_00811	TonB-dependent receptor, putative		K0038_00811	K02014			K0038_00840	yjeP	Membrane	1.50E-165	589.3	Gammaproteobacteria		1	C:GO:0005886	C:plasma membrane	K05802,K22051		M
	K0038_00812	MotA/TolQ/ExbB proton channel family protein		K0038_00812	K03561			K0038_00841		Resolvase	1.70E-105	388.7	Gammaproteobacteria		0					L
	K0038_00813	phospholipase		K0038_00813				K0038_00843		Lambda phage tail tape-measure protein (Tape_meas_lam_C)	0.00E0	1817.4	Pseudomonas syringae group		0			K15771,K18642,K20444	map02010	D
	K0038_00814	GNAT family N-acetyltransferase		K0038_00814	K03825			K0038_00844		Uncharacterized conserved protein (DUF2280)	1.30E-67	262.3	Pseudomonas syringae group		0					S
	K0038_00815	MltA domain-containing protein		K0038_00815	K08304			K0038_00845		Type VI secretion system VasI, EvfG, VC_A0118	5.30E-110	403.7	Gammaproteobacteria		0			K11909		S
	K0038_00816	hypothetical protein		K0038_00816				K0038_00846			9.70E-27	125.6	Pseudomonas syringae group		0
	K0038_00817	hypothetical protein		K0038_00817				K0038_00847		Protein of unknown function (DUF1652)	6.30E-25	119.8	Pseudomonas syringae group		0					S
	K0038_00818	response regulator		K0038_00818				K0038_00848		Toxin YafO, type II toxin-antitoxin system	1.50E-31	142.5	Gammaproteobacteria		0					S
	K0038_00819	sensory box protein		K0038_00819				K0038_00850			8.20E-100	369.8	Pseudomonas syringae group		0
	K0038_00820	3-phosphoshikimate 1-carboxyvinyltransferase		K0038_00820	K00800			K0038_00852		Domain of unknown function (DUF927)	0.00E0	1351.3	Pseudomonas syringae group		0			K06919		L
	K0038_00821	transcriptional regulator		K0038_00821	K07167			K0038_00853			1.50E-32	145.2	Pseudomonas syringae group		0
	K0038_00822	RNA polymerase sigma factor sigW, putative		K0038_00822	K03088			K0038_00855			4.40E-39	167.2	Gammaproteobacteria		0
	K0038_00823	aldose 1-epimerase		K0038_00823	K01785			K0038_00856			8.10E-23	112.5	Pseudomonas syringae group		0
	K0038_00824	membrane protein, putative		K0038_00824				K0038_00857			6.70E-9	65.9	Pseudomonas fluorescens group		0
	K0038_00825	TRAP transporter large permease		K0038_00825				K0038_00859		Helix-turn-helix domain	5.00E-42	176.8	Pseudomonas syringae group		0					S
	K0038_00826	TRAP dicarboxylate transporter, DctQ subunit, putative		K0038_00826				K0038_00860		DNA excision	5.30E-32	143.3	Bacteria		0			K07733		K
	K0038_00827	TRAP transporter substrate-binding protein		K0038_00827				K0038_00861			1.80E-22	113.2	Pseudomonas stutzeri group		0
	K0038_00828	senescence marker protein-30 family protein		K0038_00828				K0038_00862		Belongs to the 'phage' integrase family	3.60E-211	740.7	Pseudomonas syringae group		0					L
	K0038_00829	hypothetical protein		K0038_00829	K18981			K0038_00864		HAMP (Histidine kinases, Adenylyl cyclases, Methyl binding proteins, Phosphatases) domain	2.20E-261	908.3	Pseudomonas syringae group		0			K03406	map02020,map02030	NT
	K0038_00830	outer membrane porin, OprD family		K0038_00830				K0038_00865		overlaps another CDS with the same product name	8.10E-4	52.8	Oxalobacteraceae		0			K01992		M
	K0038_00831	oxidoreductase, short chain dehydrogenase/reductase family		K0038_00831	K18009			K0038_00867		Glycosyl transferase family 2	2.90E-145	521.5	Gammaproteobacteria		0					M
	K0038_00832	HAMP domain-containing protein		K0038_00832	K03406			K0038_00868		Permeases of the drug metabolite transporter (DMT) superfamily	4.80E-41	173.7	Proteobacteria		0			K12962	map01503	P
	K0038_00833	HAMP domain-containing protein		K0038_00833	K03406			K0038_00869		Glycosyl transferase family 2	1.80E-112	412.5	Pseudomonas syringae group		0			K12991,K12997		M
	K0038_00834	hypothetical protein		K0038_00834				K0038_00870		ABC-2 type transporter	5.40E-78	297.7	Pseudomonas fluorescens group		0			K01992,K09690,K09691,K09692	map02010	P
	K0038_00835	ABC transporter substrate-binding protein		K0038_00835				K0038_00871	wzt	ABC-type polysaccharide polyol phosphate transport system ATPase component	5.40E-152	544.3	Gammaproteobacteria	EC:3.6.3.38	0			K09689,K09691	map02010	GM
	K0038_00836	hypothetical protein		K0038_00836				K0038_00872	wbbL2	Glycosyltransferase WbsX	0.00E0	1087.4	Gammaproteobacteria		0					D
	K0038_00837	hypothetical protein		K0038_00837				K0038_00873	wxcA	glycosyl transferase group 1	1.70E-138	499.2	Gammaproteobacteria		0					M
	K0038_00838	hypothetical protein PA14		K0038_00838				K0038_00874		Nad-dependent epimerase dehydratase	3.00E-120	438.3	Proteobacteria	EC:1.1.1.281; EC:5.1.3.2	0			K01784,K15856	map00051,map00052,map00520,map01100	M
	K0038_00839	hypothetical protein		K0038_00839				K0038_00875	gmd	Catalyzes the conversion of GDP-D-mannose to GDP-4- dehydro-6-deoxy-D-mannose	2.70E-175	621.3	Gammaproteobacteria	EC:4.2.1.47	0			K01711	map00051,map00520,map01100	M
	K0038_00840	protein of unknown function		K0038_00840				K0038_00876		oxidoreductase	1.00E-89	337.4	Gammaproteobacteria	EC:3.1.2.6	0			K01069	map00620	S
	K0038_00841	Resolvase		K0038_00841				K0038_00877	cysC	Catalyzes the synthesis of activated sulfate	1.30E-70	272.7	Gammaproteobacteria	EC:2.7.7.4; EC:2.7.1.25	0			K00860,K00955	map00230,map00261,map00450,map00920,map01100,map01120,map01130	F
	K0038_00842	protein of unknown function		K0038_00842				K0038_00878		Acyltransferase family	4.90E-138	498.4	Nitrosomonadales		2	C:GO:0016020; P:GO:0009103	C:membrane; P:lipopolysaccharide biosynthetic process			I
	K0038_00843	phage tail tape measure protein		K0038_00843				K0038_00879	cpsB	Belongs to the mannose-6-phosphate isomerase type 2 family	9.10E-222	776.2	Gammaproteobacteria	EC:2.7.7.13; EC:5.3.1.8	0			K00971,K16011	map00051,map00520,map01100,map01110,map01130,map02025	GM
	K0038_00844	hypothetical protein		K0038_00844				K0038_00880		Glycosyltransferase like family 2	9.30E-111	406.8	Pseudomonas syringae group		0			K12991,K12997		M
	K0038_00845	DNA primase		K0038_00845				K0038_00881	rfbA	Catalyzes the formation of dTDP-glucose, from dTTP and glucose 1-phosphate, as well as its pyrophosphorolysis	3.20E-169	600.9	Pseudomonas syringae group	EC:2.7.7.24	10	F:GO:0000287; F:GO:0008879; P:GO:0045226; P:GO:0019300; C:GO:0005886; P:GO:0046075; C:GO:0005618; P:GO:0019305; P:GO:0006006; P:GO:0040007	F:magnesium ion binding; P:rhamnose biosynthetic process; C:cell wall; P:growth; F:glucose-1-phosphate thymidylyltransferase activity; P:extracellular polysaccharide biosynthetic process; P:glucose metabolic process; P:dTDP-rhamnose biosynthetic process; P:dTTP metabolic process; C:plasma membrane	K00973	map00521,map00523,map00525,map01130	H
	K0038_00846	Prophage PssSM-02, Orf7		K0038_00846				K0038_00882	rfbD	Catalyzes the reduction of dTDP-6-deoxy-L-lyxo-4- hexulose to yield dTDP-L-rhamnose	6.20E-160	570.1	Pseudomonas syringae group	EC:1.1.1.133	4	P:GO:0045226; P:GO:0009103; F:GO:0008831; C:GO:0005829	P:extracellular polysaccharide biosynthetic process; C:cytosol; P:lipopolysaccharide biosynthetic process; F:dTDP-4-dehydrorhamnose reductase activity	K00067	map00521,map00523,map01130	M
	K0038_00847	hypothetical protein		K0038_00847				K0038_00883	rfbB	Polysaccharide biosynthesis protein	1.70E-209	734.9	Pseudomonas syringae group	EC:4.2.1.46	6	F:GO:0042802; P:GO:0009226; P:GO:0045226; P:GO:0009103; F:GO:0008460; C:GO:0005829	F:dTDP-glucose 4,6-dehydratase activity; F:identical protein binding; P:extracellular polysaccharide biosynthetic process; P:nucleotide-sugar biosynthetic process; C:cytosol; P:lipopolysaccharide biosynthetic process	K01710	map00521,map00523,map00525,map01055,map01130	M
	K0038_00848	type II toxin-antitoxin system YafO family toxin		K0038_00848				K0038_00884	ychF	ATPase that binds to both the 70S ribosome and the 50S ribosomal subunit in a nucleotide-independent manner	1.50E-205	721.8	Pseudomonas syringae group		7	F:GO:0016887; F:GO:0043023; P:GO:0043086; P:GO:0006979; C:GO:0005737; F:GO:0004857; F:GO:0043022	F:ribosomal large subunit binding; F:ATP hydrolysis activity; P:response to oxidative stress; F:ribosome binding; C:cytoplasm; P:negative regulation of catalytic activity; F:enzyme inhibitor activity	K06942		J
	K0038_00849	hypothetical protein		K0038_00849				K0038_00885	pth	The natural substrate for this enzyme may be peptidyl- tRNAs which drop off the ribosome during protein synthesis	2.70E-108	397.9	Pseudomonas syringae group	EC:3.1.1.29	3	F:GO:0004045; C:GO:0005737; P:GO:0006515	F:aminoacyl-tRNA hydrolase activity; C:cytoplasm; P:protein quality control for misfolded or incompletely synthesized proteins	K01056		J
	K0038_00850	putative protein		K0038_00850				K0038_00886	ctc	This is one of the proteins that binds to the 5S RNA in the ribosome where it forms part of the central protuberance	2.40E-107	394.8	Pseudomonas syringae group		3	P:GO:0006412; C:GO:0022625; F:GO:0008097	F:5S rRNA binding; C:cytosolic large ribosomal subunit; P:translation	K02897	map03010	J
	K0038_00851	putative protein		K0038_00851				K0038_00887	prs	Involved in the biosynthesis of the central metabolite phospho-alpha-D-ribosyl-1-pyrophosphate (PRPP) via the transfer of pyrophosphoryl group from ATP to 1-hydroxyl of ribose-5-phosphate (Rib-5-P)	8.90E-170	602.8	Pseudomonas syringae group	EC:2.7.6.1	6	F:GO:0000287; P:GO:0006015; F:GO:0042301; P:GO:0009152; F:GO:0004749; C:GO:0005829	F:magnesium ion binding; P:purine ribonucleotide biosynthetic process; P:5-phosphoribose 1-diphosphate biosynthetic process; F:ribose phosphate diphosphokinase activity; F:phosphate ion binding; C:cytosol	K00948	map00030,map00230,map01100,map01110,map01120,map01130,map01200,map01230	F
	K0038_00852	hypothetical protein		K0038_00852	K06919			K0038_00889	ispE	Catalyzes the phosphorylation of the position 2 hydroxy group of 4-diphosphocytidyl-2C-methyl-D-erythritol	1.90E-155	555.1	Pseudomonas syringae group	EC:2.1.1.182; EC:2.7.1.148	5	F:GO:0005524; P:GO:0016310; P:GO:0008299; F:GO:0050515; P:GO:0040007	F:4-(cytidine 5'-diphospho)-2-C-methyl-D-erythritol kinase activity; P:growth; P:isoprenoid biosynthetic process; P:phosphorylation; F:ATP binding	K00919,K02528,K16924	map00900,map01100,map01110,map01130	F
	K0038_00853	putative protein		K0038_00853				K0038_00890	lolB	Plays a critical role in the incorporation of lipoproteins in the outer membrane after they are released by the LolA protein	2.90E-116	424.5	Pseudomonas syringae group		5	P:GO:0044874; P:GO:0042157; P:GO:0010876; C:GO:0009279; F:GO:0071723	P:lipoprotein localization to outer membrane; C:cell outer membrane; P:lipoprotein metabolic process; F:lipopeptide binding; P:lipid localization	K02494		M
	K0038_00854	hypothetical protein		K0038_00854				K0038_00891		Tetratricopeptide repeat	6.50E-264	916.4	Pseudomonas syringae group		0					S
	K0038_00855	Hypothetical protein		K0038_00855				K0038_00892	hemA	Catalyzes the NADPH-dependent reduction of glutamyl- tRNA(Glu) to glutamate 1-semialdehyde (GSA)	1.40E-226	792	Pseudomonas syringae group	EC:1.2.1.70	4	F:GO:0042802; P:GO:0019353; C:GO:0055040; F:GO:0008883	F:identical protein binding; F:glutamyl-tRNA reductase activity; C:periplasmic flagellum; P:protoporphyrinogen IX biosynthetic process from glutamate	K02407,K02492	map00860,map01100,map01110,map01120,map02040	H
	K0038_00856	putative protein		K0038_00856				K0038_00893	prfA	Peptide chain release factor 1 directs the termination of translation in response to the peptide chain termination codons UAG and UAA	1.30E-196	692.2	Pseudomonas syringae group		4	F:GO:0016149; P:GO:0006415; F:GO:0043022; C:GO:0005829	F:translation release factor activity, codon specific; F:ribosome binding; P:translational termination; C:cytosol	K02835,K15034		J
	K0038_00857	ash family protein		K0038_00857				K0038_00894	prmC	Methylates the class 1 translation termination release factors RF1 PrfA and RF2 PrfB on the glutamine residue of the universally conserved GGQ motif	2.00E-136	491.9	Pseudomonas syringae group	EC:2.1.1.297	5	P:GO:0018364; F:GO:0036009; P:GO:0006415; P:GO:0010468; C:GO:0005829	P:regulation of gene expression; F:protein-glutamine N-methyltransferase activity; P:peptidyl-glutamine methylation; P:translational termination; C:cytosol	K02493,K02835		J
	K0038_00859	helix-turn-helix domain-containing protein		K0038_00859				K0038_00895	moeB	Molybdopterin biosynthesis protein MoeB	1.20E-127	462.6	Pseudomonas syringae group	EC:2.7.7.80	0			K21029	map04122	H
	K0038_00860	AlpA family phage regulatory protein		K0038_00860				K0038_00896	murI	Provides the (R)-glutamate required for cell wall biosynthesis	9.20E-147	526.2	Pseudomonas syringae group	EC:5.1.1.3	2	P:GO:0009252; F:GO:0047661	F:amino-acid racemase activity; P:peptidoglycan biosynthetic process	K01776	map00471,map01100	M
	K0038_00861	redoxin		K0038_00861				K0038_00897		Has lipid A 3-O-deacylase activity. Hydrolyzes the ester bond at the 3 position of lipid A, a bioactive component of lipopolysaccharide (LPS), thereby releasing the primary fatty acyl moiety	9.80E-94	349.4	Pseudomonas syringae group		0			K12976,K16079		M
	K0038_00862	hypothetical protein		K0038_00862				K0038_00898			5.90E-2	42.7	Pseudomonas syringae group		0
	K0038_00864	methyl-accepting chemotaxis protein		K0038_00864				K0038_00899	MM2374	Putative zinc- or iron-chelating domain	2.50E-51	208	Pseudomonas syringae group		0					S
	K0038_00865	glycosyltransferase family 39 protein		K0038_00865				K0038_00900		Protein of unknown function (DUF2878)	1.10E-84	319.3	Pseudomonas syringae group		0					S
	K0038_00866	hypothetical protein		K0038_00866				K0038_00901	cfa	synthase	2.10E-238	831.2	Pseudomonas syringae group	EC:2.1.1.79; EC:2.1.1.317	0			K00574,K20238		M
	K0038_00867	glycosyltransferase family 2 protein		K0038_00867				K0038_00902		Protein of unknown function (DUF1365)	2.60E-146	524.6	Pseudomonas syringae group	EC:2.1.1.79	0			K00574,K09701		S
	K0038_00868	4-amino-4-deoxy-L-arabinose-phospho-UDP flippase		K0038_00868				K0038_00903		Flavin containing amine oxidoreductase	1.60E-235	821.6	Pseudomonas syringae group		0			K06954		S
	K0038_00869	glycosyltransferase family 2 protein		K0038_00869				K0038_00904	sdh	NAD(P)H-binding	1.50E-130	472.2	Pseudomonas syringae group		0					S
	K0038_00870	ABC transporter permease		K0038_00870	K09690			K0038_00905		Uncharacterized conserved protein (DUF2358)	1.50E-76	292	Pseudomonas syringae group	EC:5.3.3.1	0			K01822,K21972	map00140,map00984,map01100,map01120	S
	K0038_00871	ABC transporter ATP-binding protein		K0038_00871	K09691			K0038_00906	phrB	Belongs to the DNA photolyase family	8.10E-271	939.1	Pseudomonas syringae group	EC:4.1.99.3	3	P:GO:0018298; F:GO:0003904; P:GO:0006281	P:protein-chromophore linkage; F:deoxyribodipyrimidine photo-lyase activity; P:DNA repair	K01669		L
	K0038_00872	glycosyltransferase		K0038_00872				K0038_00907	ycgE	transcriptional	2.10E-168	598.2	Pseudomonas syringae group		3	F:GO:0003700; P:GO:0045892; P:GO:0010629	P:negative regulation of gene expression; P:negative regulation of transcription, DNA-templated; F:DNA-binding transcription factor activity	K21089,K21972,K22491	map02026	K
	K0038_00873	glycosyltransferase family 4 protein		K0038_00873				K0038_00908	ybgA	Protein of unknown function (DUF1722)	8.50E-184	649.4	Pseudomonas syringae group		0					S
	K0038_00874	NAD-dependent epimerase/dehydratase family protein		K0038_00874	K15856			K0038_00909	VPA1560	Tryptophan-rich protein (DUF2389)	2.60E-32	144.1	Pseudomonas syringae group		0					S
	K0038_00875	GDP-mannose 4,6-dehydratase		K0038_00875	K01711			K0038_00910		Catalyzes the oxidation of the 1,2-dihydro- and 1,6- dihydro- isomeric forms of beta-NAD(P) back to beta-NAD(P) . May serve to protect primary metabolism dehydrogenases from inhibition by the 1,2-dihydro- and 1,6-dihydro-beta-NAD(P) isomers	3.00E-184	651	Pseudomonas syringae group		5	F:GO:0071949; F:GO:0050661; F:GO:0050664; P:GO:0008152; F:GO:0051287	F:oxidoreductase activity, acting on NAD(P)H, oxygen as acceptor; F:NADP binding; F:NAD binding; F:FAD binding; P:metabolic process	K06955		H
	K0038_00876	hydroxyacylglutathione hydrolase		K0038_00876				K0038_00911	yfcH	Domain of unknown function (DUF1731)	3.30E-169	600.9	Pseudomonas syringae group		0			K07071		S
	K0038_00877	adenylyl-sulfate kinase		K0038_00877	K00860			K0038_00912	hemH	Catalyzes the ferrous insertion into protoporphyrin IX	7.90E-196	689.5	Pseudomonas syringae group	EC:4.99.1.9; EC:4.99.1.1	2	F:GO:0004325; P:GO:0006783	F:ferrochelatase activity; P:heme biosynthetic process	K01772	map00860,map01100,map01110	H
	K0038_00878	acyltransferase		K0038_00878				K0038_00913	pyrP	Permease family	2.90E-232	810.8	Pseudomonas syringae group		0			K02824,K16345		F
	K0038_00879	mannose-1-phosphate guanylyltransferase/mannose-6-phosphate isomerase		K0038_00879	K16011			K0038_00914	upp	Catalyzes the conversion of uracil and 5-phospho-alpha- D-ribose 1-diphosphate (PRPP) to UMP and diphosphate	2.90E-111	407.9	Pseudomonas syringae group	EC:2.4.2.9	9	P:GO:0016310; F:GO:0042802; F:GO:0004845; P:GO:0006222; P:GO:0046132; P:GO:0043097; P:GO:0006206; F:GO:0004849; C:GO:0005829	P:UMP biosynthetic process; F:identical protein binding; F:uridine kinase activity; P:pyrimidine ribonucleoside biosynthetic process; P:pyrimidine nucleobase metabolic process; F:uracil phosphoribosyltransferase activity; P:pyrimidine nucleoside salvage; P:phosphorylation; C:cytosol	K00761	map00240,map01100	F
	K0038_00880	glycosyltransferase		K0038_00880	K12991			K0038_00915	hpt	Phosphoribosyl transferase domain	3.90E-104	384	Pseudomonas syringae group	EC:6.3.4.19; EC:2.4.2.8	1	C:GO:0005737	C:cytoplasm	K00760,K15780	map00230,map00983,map01100,map01110	F
	K0038_00881	glucose-1-phosphate thymidylyltransferase		K0038_00881	K00973			K0038_00916			4.40E-83	313.9	Pseudomonas syringae group		0
	K0038_00882	dTDP-4-dehydrorhamnose reductase		K0038_00882	K00067			K0038_00917	IV02_13490	aminopeptidase	9.40E-46	189.1	Pseudomonas syringae group		0					S
	K0038_00883	dTDP-glucose 4,6-dehydratase		K0038_00883	K01710			K0038_00918		amino acid	8.30E-143	513.1	Pseudomonas syringae group		0			K02029		P
	K0038_00884	GTP-binding protein YchF		K0038_00884	K06942			K0038_00919		Belongs to the bacterial solute-binding protein 3 family	2.10E-151	541.6	Pseudomonas syringae group		0			K02030,K02424	map02010	ET
	K0038_00885	peptidyl-tRNA hydrolase		K0038_00885	K01056			K0038_00920	mmuM	Homocysteine S-methyltransferase	4.70E-160	570.5	Pseudomonas syringae group	EC:2.1.1.10	0			K00547,K21169	map00270,map01059,map01100,map01110,map01130	H
	K0038_00886	LSU ribosomal protein L25P		K0038_00886	K02897			K0038_00921	mqo	malate quinone oxidoreductase	2.70E-277	960.7	Pseudomonas syringae group	EC:1.1.5.4	4	C:GO:0005886; P:GO:0008152; C:GO:0005737; F:GO:0016491	C:cytoplasm; P:metabolic process; F:oxidoreductase activity; C:plasma membrane	K00116	map00020,map00620,map01100,map01110,map01120,map01130,map01200	C
	K0038_00887	ribose-phosphate pyrophosphokinase		K0038_00887	K00948			K0038_00922			8.70E-34	149.1	Pseudomonas syringae group		0
	K0038_00889	4-diphosphocytidyl-2-C-methyl-D-erythritol kinase		K0038_00889	K00919			K0038_00923	yajG	Uncharacterized lipoprotein	5.60E-98	363.6	Pseudomonas syringae group		0			K07286		M
	K0038_00890	outer membrane lipoprotein LolB		K0038_00890	K02494			K0038_00924			6.50E-33	146	Pseudomonas syringae group		0
	K0038_00891	TPR domain protein		K0038_00891				K0038_00925		Phosphate acyltransferases	8.10E-221	772.7	Pseudomonas syringae group		0					I
	K0038_00892	glutamyl-tRNA reductase		K0038_00892	K02492			K0038_00926		Cysteine-rich CPXCG	8.00E-27	125.6	Pseudomonas syringae group		0					S
	K0038_00893	peptide chain release factor 1		K0038_00893	K02835			K0038_00927		Putative prokaryotic signal transducing protein	4.60E-39	166.8	Pseudomonas syringae group		0					S
	K0038_00894	hemK protein		K0038_00894	K02493			K0038_00928	yoqW	Belongs to the SOS response-associated peptidase family	2.60E-117	427.9	Pseudomonas syringae group		0					S
	K0038_00895	molybdopterin biosynthesis protein MoeB		K0038_00895	K21029			K0038_00929	Z012_09445	COG0501 Zn-dependent protease with chaperone function	1.60E-143	515.4	Pseudomonas syringae group		0					M
	K0038_00896	glutamate racemase		K0038_00896	K01776			K0038_00930	IV02_13550	Uncharacterized protein family UPF0016	2.50E-98	364.8	Pseudomonas syringae group		0					S
	K0038_00897	hypothetical protein		K0038_00897	K12976			K0038_00932	rsmC	Specifically methylates the guanine in position 1207 of 16S rRNA in the 30S particle	9.50E-186	656	Pseudomonas syringae group	EC:2.1.1.174; EC:2.1.1.172	3	P:GO:0070475; F:GO:0052914; C:GO:0005829	F:16S rRNA (guanine(1207)-N(2))-methyltransferase activity; P:rRNA base methylation; C:cytosol	K00564,K11391		J
	K0038_00898	hypothetical protein		K0038_00898				K0038_00933		transporter LysE	3.40E-104	384.4	Pseudomonas syringae group		0					E
	K0038_00899	Fe-S-oxidoreductase		K0038_00899	K06940			K0038_00934	alkK	COG0318 Acyl-CoA synthetases (AMP-forming) AMP-acid ligases II	0.00E0	1095.5	Pseudomonas syringae group		0			K00666		IQ
	K0038_00900	membrane protein, putative		K0038_00900				K0038_00935		Protein of unknown function (DUF1302)	0.00E0	1268.8	Pseudomonas syringae group		0					M
	K0038_00901	cyclopropane-fatty-acyl-phospholipid synthase		K0038_00901	K00574			K0038_00936	IV02_13580	Protein of unknown function (DUF1329)	2.60E-266	924.1	Pseudomonas syringae group		0					S
	K0038_00902	hypothetical protein		K0038_00902	K09701			K0038_00937		Transcriptional regulator	0.00E0	1646.3	Gammaproteobacteria		0			K03556		K
	K0038_00903	amine oxidase, flavin-containing protein		K0038_00903	K06954			K0038_00938		COG2206 HD-GYP domain	2.20E-197	694.9	Gammaproteobacteria		0					T
	K0038_00904	oxidoreductase, short chain dehydrogenase/reductase family		K0038_00904				K0038_00940	rutF	Catalyzes the reduction of FMN to FMNH2 which is used to reduce pyrimidine by RutA via the Rut pathway	1.90E-79	302	Pseudomonas syringae group		4	F:GO:0042602; P:GO:0042178; P:GO:0006212; P:GO:0019740	P:uracil catabolic process; F:riboflavin reductase (NADPH) activity; P:nitrogen utilization; P:xenobiotic catabolic process	K09024	map00240,map01100	C
	K0038_00905	hypothetical protein		K0038_00905				K0038_00941	rutD	May increase the rate of spontaneous hydrolysis of aminoacrylate to malonic semialdehyde. Required to remove a toxic intermediate produce in the pyrimidine nitrogen degradation	1.10E-128	466.1	Pseudomonas syringae group		0			K09023	map00240,map01100	S
	K0038_00906	deoxyribodipyrimidine photolyase		K0038_00906	K01669			K0038_00942	rutC	May reduce aminoacrylate peracid to aminoacrylate. Required to remove a toxic intermediate produce by the pyrimidine nitrogen degradation	1.30E-66	258.8	Pseudomonas syringae group	EC:3.5.99.10	3	P:GO:0042178; P:GO:0006212; P:GO:0019740	P:uracil catabolic process; P:nitrogen utilization; P:xenobiotic catabolic process	K09021,K09022	map00240,map01100	C
	K0038_00907	MerR family transcriptional regulator		K0038_00907	K22491			K0038_00943	rutB	In vivo, quickly hydrolyzes the ureidoacrylate peracid to avoid toxicity, but can also hydrolyzes ureidoacrylate that is formed spontaneously from ureidoacrylate peracid. One of the products of hydrolysis, carbamate, hydrolyzes spontaneously, thereby releasing one of the pyrimidine rings nitrogen atoms as ammonia and one of its carbons as CO2	5.30E-133	480.3	Pseudomonas syringae group	EC:3.5.1.110	5	P:GO:0042178; F:GO:0016811; P:GO:0006212; P:GO:0019740; C:GO:0005737	P:uracil catabolic process; P:nitrogen utilization; C:cytoplasm; F:hydrolase activity, acting on carbon-nitrogen (but not peptide) bonds, in linear amides; P:xenobiotic catabolic process	K09020	map00240,map01100	Q
	K0038_00908	hypothetical protein		K0038_00908				K0038_00944	rutA	Catalyzes the pyrimidine ring opening between N-3 and C- 4 by an unusual flavin hydroperoxide-catalyzed mechanism to yield ureidoacrylate peracid. It cleaves pyrmidine rings directly by adding oxygen atoms, making a toxic ureidoacrylate peracid product which can be spontaneously reduced to ureidoacrylate	3.00E-201	707.6	Pseudomonas syringae group	EC:1.14.99.46	6	P:GO:0042178; P:GO:0006212; F:GO:0052614; P:GO:0006210; F:GO:0004497; P:GO:0019740	P:uracil catabolic process; F:uracil oxygenase activity; P:nitrogen utilization; P:thymine catabolic process; F:monooxygenase activity; P:xenobiotic catabolic process	K09018	map00240,map01100	F
	K0038_00909	TIGR02450 family Trp-rich protein		K0038_00909				K0038_00945	rutR	Transcriptional regulator	1.20E-121	442.6	Pseudomonas syringae group		8	C:GO:0032993; P:GO:0010628; P:GO:0045892; P:GO:0010629; P:GO:0045893; F:GO:0000976; F:GO:0001217; C:GO:0005829	P:negative regulation of gene expression; P:negative regulation of transcription, DNA-templated; C:protein-DNA complex; F:DNA-binding transcription repressor activity; F:transcription cis-regulatory region binding; P:positive regulation of transcription, DNA-templated; P:positive regulation of gene expression; C:cytosol	K09017		K
	K0038_00910	amine oxidase, flavin-containing protein		K0038_00910	K18208			K0038_00946		ABC transporter substrate-binding protein PnrA-like	9.30E-203	712.6	Pseudomonas syringae group		0					S
	K0038_00911	hypothetical protein		K0038_00911	K07071			K0038_00947		ATPases associated with a variety of cellular activities	1.70E-263	914.8	Pseudomonas syringae group	EC:3.6.3.17	0			K02056		P
	K0038_00912	ferrochelatase		K0038_00912	K01772			K0038_00948	tsgB13	Belongs to the binding-protein-dependent transport system permease family	5.00E-188	663.7	Pseudomonas syringae group		0			K02057		P
	K0038_00913	uracil permease		K0038_00913	K02824			K0038_00949	rbsC-2	Belongs to the binding-protein-dependent transport system permease family	6.10E-155	553.5	Pseudomonas syringae group		0			K02057		P
	K0038_00914	uracil phosphoribosyltransferase		K0038_00914	K00761			K0038_00950	yiaD	Belongs to the ompA family	2.90E-117	427.9	Pseudomonas syringae group		0					M
	K0038_00915	hypoxanthine-guanine phosphoribosyltransferase		K0038_00915	K00760			K0038_00951	yihG	Phosphate acyltransferases	8.30E-173	612.8	Pseudomonas syringae group		0					I
	K0038_00916	hypothetical protein		K0038_00916				K0038_00952	pta	belongs to the CobB CobQ family	0.00E0	1328.2	Pseudomonas syringae group	EC:2.3.1.8	11	P:GO:0042178; P:GO:0070689; P:GO:0045733; F:GO:0008959; F:GO:0008270; P:GO:0006113; P:GO:0019413; P:GO:0017000; P:GO:0017001; P:GO:0019427; C:GO:0005829	P:antibiotic catabolic process; P:fermentation; P:L-threonine catabolic process to propionate; P:acetate catabolic process; P:acetyl-CoA biosynthetic process from acetate; F:phosphate acetyltransferase activity; F:zinc ion binding; P:acetate biosynthetic process; P:antibiotic biosynthetic process; P:xenobiotic catabolic process; C:cytosol	K13788	map00430,map00620,map00640,map00680,map00720,map01100,map01120,map01200	C
	K0038_00917	hypothetical protein		K0038_00917				K0038_00953	slyD	Peptidyl-prolyl cis-trans	7.30E-83	313.2	Pseudomonas syringae group	EC:5.2.1.8	3	F:GO:0003755; P:GO:0042026; P:GO:0000413	P:protein peptidyl-prolyl isomerization; P:protein refolding; F:peptidyl-prolyl cis-trans isomerase activity	K03774,K03775		G
	K0038_00918	amino acid ABC transporter membrane protein, PAAT family		K0038_00918	K02029			K0038_00954	btuE	Belongs to the glutathione peroxidase family	3.60E-90	337.4	Pseudomonas syringae group	EC:1.11.1.9	0			K00432	map00480,map00590,map04918	O
	K0038_00919	amino acid ABC transporter, periplasmic amino acid-binding protein		K0038_00919	K02030			K0038_00955		NADH:flavin oxidoreductase / NADH oxidase family	2.00E-205	721.5	Pseudomonas syringae group		0					C
	K0038_00920	homocysteine S-methyltransferase		K0038_00920				K0038_00956		Glycosyltransferase Family 4	4.30E-225	786.9	Pseudomonas syringae group		0					M
	K0038_00921	malate dehydrogenase (quinone)		K0038_00921	K00116			K0038_00957			6.10E-19	100.1	Pseudomonas syringae group		0
	K0038_00922	Hypothetical protein		K0038_00922				K0038_00958			1.50E-90	339	Pseudomonas syringae group		0
	K0038_00923	lipoprotein		K0038_00923	K07286			K0038_00959			5.20E-38	163.7	Pseudomonas syringae group		0
	K0038_00924	hypothetical protein		K0038_00924				K0038_00960	cysZ	High affinity, high specificity proton-dependent sulfate transporter, which mediates sulfate uptake. Provides the sulfur source for the cysteine synthesis pathway	9.90E-135	486.1	Pseudomonas syringae group		6	P:GO:1902358; P:GO:1902600; P:GO:0019344; C:GO:0005887; F:GO:0009675; P:GO:0000103	P:cysteine biosynthetic process; C:integral component of plasma membrane; P:sulfate assimilation; P:proton transmembrane transport; F:high-affinity sulfate:proton symporter activity; P:sulfate transmembrane transport	K06203		E
	K0038_00925	glycerol acyltransferase		K0038_00925				K0038_00961	ahpC	C-terminal domain of 1-Cys peroxiredoxin	3.60E-108	397.5	Pseudomonas syringae group	EC:1.11.1.15	0			K03386,K20011	map04214	O
	K0038_00926	hypothetical protein		K0038_00926				K0038_00962	trxB	Belongs to the class-II pyridine nucleotide-disulfide oxidoreductase family	7.00E-178	629.8	Pseudomonas syringae group	EC:4.3.1.9; EC:1.8.1.9	10	P:GO:0098869; P:GO:0045454; F:GO:0004791; P:GO:0001666; P:GO:0008152; F:GO:0070402; F:GO:0016651; F:GO:0050660; C:GO:0005829; P:GO:0040007	F:NADPH binding; F:oxidoreductase activity, acting on NAD(P)H; F:flavin adenine dinucleotide binding; P:growth; P:response to hypoxia; P:cell redox homeostasis; P:metabolic process; P:cellular oxidant detoxification; F:thioredoxin-disulfide reductase activity; C:cytosol	K00384,K03671,K22345	map00030,map00450,map04621,map05418	C
	K0038_00927	protein of unknown function		K0038_00927				K0038_00963	hopJ	HopJ type III effector protein	1.20E-52	212.2	Pseudomonas syringae group		0					S
	K0038_00928	Hypothetical protein		K0038_00928				K0038_00964	MA20_03865	Protein of unknown function (DUF1244)	3.60E-48	197.2	Pseudomonas syringae group		0			K09948		S
	K0038_00929	Peptidase M48, Ste24p		K0038_00929				K0038_00965	folX	Dihydroneopterin aldolase	4.30E-59	233.8	Pseudomonas syringae group	EC:5.1.99.7; EC:4.1.2.25; EC:5.1.99.8; EC:1.13.11.81	5	P:GO:0019752; P:GO:0006760; P:GO:0043603; F:GO:0008719; C:GO:0005829	F:dihydroneopterin triphosphate 2'-epimerase activity; P:folic acid-containing compound metabolic process; P:cellular amide metabolic process; P:carboxylic acid metabolic process; C:cytosol	K01633,K07589	map00790,map01100	H
	K0038_00930	hypothetical protein		K0038_00930	K23541			K0038_00966	folE	GTP cyclohydrolase	4.60E-97	360.5	Pseudomonas syringae group	EC:3.5.4.16	7	F:GO:0005525; F:GO:0008270; P:GO:0006729; P:GO:0006805; C:GO:0005737; F:GO:0003934; F:GO:0032550	P:tetrahydrobiopterin biosynthetic process; F:GTP cyclohydrolase I activity; F:purine ribonucleoside binding; F:GTP binding; C:cytoplasm; F:zinc ion binding; P:xenobiotic metabolic process	K01495	map00790,map01100	F
	K0038_00932	ribosomal RNA small subunit methyltransferase C		K0038_00932	K00564			K0038_00967		Enoyl-(Acyl carrier protein) reductase	7.60E-121	439.9	Pseudomonas syringae group		0					IQ
	K0038_00933	LysE family transporter		K0038_00933				K0038_00968		Antibiotic biosynthesis monooxygenase	1.50E-95	355.5	Pseudomonas syringae group		0			K09932		S
	K0038_00934	long-chain fatty acid-CoA ligase		K0038_00934	K00666			K0038_00969			2.80E-108	397.9	Pseudomonas syringae group		0
	K0038_00935	hypothetical protein		K0038_00935				K0038_00970	yqcA	Flavodoxin	1.10E-72	279.3	Pseudomonas syringae group		1	F:GO:0010181	F:FMN binding	K06205		C
	K0038_00936	hypothetical protein		K0038_00936				K0038_00971		Belongs to the short-chain dehydrogenases reductases (SDR) family	4.00E-159	567.4	Pseudomonas syringae group		0					IQ
	K0038_00937	helix-turn-helix transcriptional regulator		K0038_00937	K03556			K0038_00972			4.80E-86	323.9	Pseudomonas syringae group		0
	K0038_00938	hypothetical protein		K0038_00938	K25135			K0038_00973	ychA	Transglutaminase-like superfamily	2.50E-136	491.5	Bacteria		0					P
	K0038_00939	hypothetical protein		K0038_00939				K0038_00974			1.30E-154	552.4	Pseudomonas syringae group		0
	K0038_00940	pyrimidine utilization flavin reductase protein F		K0038_00940	K09024			K0038_00975		Bacteriophage N adsorption protein A C-term	0.00E0	1213.7	Gammaproteobacteria	EC:2.7.11.1	0			K14949,K20543	map05152	O
	K0038_00941	pyrimidine utilization protein D		K0038_00941	K09023			K0038_00976	nfrB	Type II secretion system (T2SS), protein E, N-terminal domain	0.00E0	1347.4	Pseudomonas syringae group	EC:2.4.1.336	1	C:GO:0005886	C:plasma membrane	K02359,K11740,K19003	map00561,map01100,map04320	M
	K0038_00942	endoribonuclease L-PSP family protein		K0038_00942	K09021			K0038_00977		Bacterial cellulose synthase subunit	0.00E0	1349.7	Pseudomonas syringae group		0					S
	K0038_00943	isochorismatase family protein		K0038_00943	K09020			K0038_00978	wecB	UDP-N-acetylglucosamine 2-epimerase	1.70E-224	785	Pseudomonas syringae group	EC:5.1.3.14	0			K01791	map00520,map01100,map05111	M
	K0038_00944	bacterial luciferase family protein		K0038_00944	K09018			K0038_00979	yebG	response to X-ray	1.90E-37	161.4	Bacteria		4	P:GO:0009432; P:GO:0010165; P:GO:0006281; C:GO:0005829	P:response to X-ray; P:SOS response; P:DNA repair; C:cytosol	K09918		S
	K0038_00945	transcriptional regulator, TetR family		K0038_00945	K09017			K0038_00980	psiE	Belongs to the PsiE family	6.60E-84	316.6	Pseudomonas syringae group		0					S
	K0038_00946	bmp family protein		K0038_00946	K07335			K0038_00981		YXWGXW repeat (2 copies)	1.00E-35	156	Pseudomonas syringae group		0					S
	K0038_00947	ATP-binding cassette domain-containing protein		K0038_00947	K23537			K0038_00982	hcp1	Type VI secretion system effector, Hcp	1.10E-70	272.7	Gammaproteobacteria		0			K06887,K11903	map02025,map03070	S
	K0038_00948	ABC transporter permease		K0038_00948	K23535			K0038_00983			3.30E-83	315.1	Gammaproteobacteria		1	C:GO:0005829	C:cytosol
	K0038_00949	ABC transporter permease		K0038_00949	K23536			K0038_00985		Protein of unknown function (DUF3509)	8.60E-51	206.1	Pseudomonas syringae group		0					S
	K0038_00950	OmpA family protein		K0038_00950				K0038_00986	ylaC_1	Belongs to the sigma-70 factor family. ECF subfamily	6.70E-93	346.7	Pseudomonas syringae group		0			K03088		K
	K0038_00951	acyltransferase		K0038_00951				K0038_00987		Domain of unknown function (DUF4880)	9.80E-156	556.2	Pseudomonas syringae group		0			K07165		PT
	K0038_00952	phosphate acetyltransferase		K0038_00952	K13788			K0038_00988	hpf	Sigma 54 modulation protein / S30EA ribosomal protein	3.00E-72	277.7	Pseudomonas syringae group		4	F:GO:0043024; C:GO:0022627; P:GO:0045900; F:GO:0043022	F:ribosome binding; F:ribosomal small subunit binding; C:cytosolic small ribosomal subunit; P:negative regulation of translational elongation	K05808		J
	K0038_00953	peptidyl-prolyl cis-trans isomerase, FKBP-type		K0038_00953	K03775			K0038_00989	bfrH	COG1629 Outer membrane receptor proteins, mostly Fe transport	0.00E0	1563.5	Pseudomonas syringae group		0			K02014		P
	K0038_00954	glutathione peroxidase family protein		K0038_00954	K00432			K0038_00990	fecA	Iron(III) dicitrate transport protein fecA	0.00E0	1548.1	Pseudomonas syringae group		3	P:GO:0034755; C:GO:0009279; F:GO:0015091	C:cell outer membrane; F:ferric iron transmembrane transporter activity; P:iron ion transmembrane transport	K16091		P
	K0038_00955	oxidoreductase, FAD/FMN-binding protein		K0038_00955				K0038_00991	fecR	Domain of unknown function (DUF4880)	3.90E-152	544.3	Pseudomonas syringae group		0			K07165		PT
	K0038_00956	glycosyl transferase, group 1 family protein		K0038_00956				K0038_00992	fecI	Belongs to the sigma-70 factor family. ECF subfamily	9.90E-83	312.8	Pseudomonas syringae group		0			K03088		K
	K0038_00957	Hypothetical protein		K0038_00957				K0038_00993	tetD	helix_turn_helix, arabinose operon control protein	3.30E-158	564.3	Pseudomonas syringae group		0			K07506		K
	K0038_00958	membrane protein, putative		K0038_00958				K0038_00994	BP3797	EamA-like transporter family	2.20E-157	561.6	Pseudomonas syringae group		0					EG
	K0038_00959	hypothetical protein		K0038_00959				K0038_00995	ghrB	Belongs to the D-isomer specific 2-hydroxyacid dehydrogenase family	3.30E-175	620.9	Pseudomonas syringae group	EC:1.1.1.43; EC:1.1.1.215; EC:1.1.1.26; EC:1.1.1.79; EC:1.1.1.81	5	F:GO:0030267; F:GO:0008873; F:GO:0016618; P:GO:0046181; C:GO:0005829	P:ketogluconate catabolic process; F:hydroxypyruvate reductase activity; C:cytosol; F:gluconate 2-dehydrogenase activity; F:glyoxylate reductase (NADP+) activity	K00015,K00032,K00090	map00030,map00260,map00480,map00620,map00630,map01100,map01110,map01120	C
	K0038_00960	cysZ-like protein		K0038_00960	K06203			K0038_00996		Transcriptional regulator	3.70E-171	607.4	Pseudomonas syringae group		0					K
	K0038_00961	redoxin domain-containing protein		K0038_00961	K03386			K0038_00997		Belongs to the short-chain dehydrogenases reductases (SDR) family	3.20E-139	501.1	Pseudomonas syringae group		0					IQ
	K0038_00962	thioredoxin reductase		K0038_00962	K22345			K0038_00998			1.00E-70	272.7	Pseudomonas syringae group		0
	K0038_00963	HopJ type III effector protein		K0038_00963				K0038_01000		COG3209 Rhs family protein	0.00E0	1416	Pseudomonas syringae group		0			K11021,K19615	map02020	M
	K0038_00964	hypothetical protein		K0038_00964	K09948			K0038_01001	algA	Belongs to the mannose-6-phosphate isomerase type 2 family	3.30E-280	970.3	Pseudomonas syringae group	EC:2.7.7.13; EC:5.3.1.8	0			K00971,K16011	map00051,map00520,map01100,map01110,map01130,map02025	M
	K0038_00965	dihydroneopterin aldolase		K0038_00965	K07589			K0038_01002	algF	Alginate biosynthesis protein AlgF	1.30E-114	419.1	Pseudomonas syringae group		0			K19296		M
	K0038_00966	GTP cyclohydrolase I		K0038_00966	K01495			K0038_01003	algJ	Alginate biosynthesis protein AlgJ	7.40E-222	776.2	Pseudomonas syringae group		0			K19295		S
	K0038_00967	Dihydrofolate reductase FolM		K0038_00967	K13938			K0038_01004	algI	MBOAT, membrane-bound O-acyltransferase family	2.80E-293	1013.8	Pseudomonas syringae group		0			K19294		M
	K0038_00968	antibiotic biosynthesis monooxygenase		K0038_00968	K09932			K0038_01005	algL	Catalyzes the depolymerization of alginate by cleaving the beta-1,4 glycosidic bond between two adjacent sugar residues via a beta-elimination mechanism	4.50E-216	756.9	Pseudomonas syringae group	EC:4.2.2.3	0			K01729	map00051	M
	K0038_00969	protein of unknown function		K0038_00969				K0038_01006	algX	alginate	1.20E-277	961.8	Gammaproteobacteria		0			K19293,K19295		M
	K0038_00970	flavodoxin, putative		K0038_00970	K06205			K0038_01007	algG	Domain present in carbohydrate binding proteins and sugar hydrolses	7.40E-281	972.6	Pseudomonas syringae group	EC:5.1.3.37	0			K01795	map00051	M
	K0038_00971	oxidoreductase, short chain dehydrogenase/reductase family		K0038_00971				K0038_01008	algE	alginate	4.40E-288	996.5	Pseudomonas syringae group		0			K16081		S
	K0038_00972	Hypothetical protein		K0038_00972				K0038_01009	exoR	Alginate biosynthesis protein AlgK	5.50E-248	863.2	Pseudomonas syringae group		0			K07126,K19292		S
	K0038_00973	tetratricopeptide repeat protein		K0038_00973				K0038_01010	alg44	Alginate biosynthesis protein Alg44	1.10E-214	752.3	Pseudomonas syringae group	EC:2.4.1.33	0			K01991,K02005,K06147,K16552,K19291	map00051,map02025,map02026	M
	K0038_00974	hypothetical protein		K0038_00974				K0038_01011	alg8	Alginate biosynthesis protein Alg8	4.30E-283	979.9	Pseudomonas syringae group	EC:2.4.1.33	0			K19290	map00051	M
	K0038_00975	hypothetical protein		K0038_00975				K0038_01012	algD	Belongs to the UDP-glucose GDP-mannose dehydrogenase family	9.40E-250	869	Pseudomonas syringae group	EC:1.1.1.22; EC:1.1.1.132	0			K00012,K00066	map00040,map00051,map00053,map00520,map01100,map02020	H
	K0038_00976	bacteriophage N4 adsorption protein B		K0038_00976	K11740			K0038_01013	yaaA	Belongs to the UPF0246 family	1.40E-136	492.3	Pseudomonas syringae group		2	P:GO:0033194; C:GO:0005829	P:response to hydroperoxide; C:cytosol	K09861		S
	K0038_00977	hypothetical protein		K0038_00977				K0038_01014	MA20_25165	polysaccharide deacetylase	3.70E-213	747.3	Pseudomonas syringae group	EC:3.5.1.104	0			K22278		G
	K0038_00978	UDP-N-acetylglucosamine 2-epimerase		K0038_00978	K01791			K0038_01015	phoH	Large family of predicted nucleotide-binding domains	1.20E-268	931.8	Pseudomonas syringae group		0			K07175		T
	K0038_00979	YebG family protein		K0038_00979	K09918			K0038_01016	moaC	Catalyzes the conversion of (8S)-3',8-cyclo-7,8- dihydroguanosine 5'-triphosphate to cyclic pyranopterin monophosphate (cPMP)	6.40E-79	300.1	Pseudomonas syringae group	EC:4.6.1.17	9	F:GO:0042802; P:GO:0034214; C:GO:0005576; F:GO:0061799; P:GO:0035821; P:GO:0052170; P:GO:0006777; P:GO:0045824; P:GO:0040007	P:negative regulation of innate immune response; P:modulation of process of other organism; P:growth; F:identical protein binding; P:Mo-molybdopterin cofactor biosynthetic process; C:extracellular region; P:protein hexamerization; P:suppression by symbiont of host innate immune response; F:cyclic pyranopterin monophosphate synthase activity	K03637	map00790,map01100,map04122	H
	K0038_00980	hypothetical protein		K0038_00980				K0038_01017	moaD	Involved in sulfur transfer in the conversion of molybdopterin precursor Z to molybdopterin	9.80E-36	155.6	Pseudomonas syringae group	EC:2.7.7.77; EC:2.8.1.12	2	C:GO:0005829; P:GO:0006777	P:Mo-molybdopterin cofactor biosynthetic process; C:cytosol	K03636,K03752,K21142	map00790,map01100,map04122	H
	K0038_00981	lipoprotein, putative		K0038_00981				K0038_01018	moaE	Molybdenum cofactor biosynthesis protein	8.80E-75	286.2	Pseudomonas syringae group	EC:2.8.1.12	0			K03635	map00790,map01100,map04122	H
	K0038_00982	SciM protein		K0038_00982	K11903			K0038_01019	rhlB	DEAD-box RNA helicase involved in RNA degradation. Has RNA-dependent ATPase activity and unwinds double-stranded RNA	1.00E-252	879	Pseudomonas syringae group	EC:3.6.4.13	6	F:GO:0016887; P:GO:0006401; F:GO:0097718; F:GO:0003724; P:GO:0010501; C:GO:0005829	P:RNA secondary structure unwinding; P:RNA catabolic process; F:ATP hydrolysis activity; F:disordered domain specific binding; F:RNA helicase activity; C:cytosol	K03732	map03018	JKL
	K0038_00983	hypothetical protein		K0038_00983				K0038_01020	estB	Carboxylesterase	4.70E-117	427.2	Pseudomonas syringae group		0			K06999		S
	K0038_00984	hypothetical protein		K0038_00984				K0038_01021	aapJ	COG0834 ABC-type amino acid transport signal transduction systems, periplasmic component domain	1.00E-190	672.5	Pseudomonas syringae group		1	C:GO:0042597	C:periplasmic space	K09969	map02010	ET
	K0038_00985	hypothetical protein		K0038_00985				K0038_01022	yhdX	amino acid ABC transporter	6.70E-215	753.1	Pseudomonas syringae group		1	C:GO:0005886	C:plasma membrane	K09970	map02010	P
	K0038_00986	RNA polymerase sigma-70 family protein		K0038_00986				K0038_01023	aapM	COG0765 ABC-type amino acid transport system, permease component	2.10E-202	711.4	Pseudomonas syringae group		0			K02029,K09971	map02010	P
	K0038_00987	hypothetical protein		K0038_00987				K0038_01024	yhdZ	ABC transporter, ATP-binding protein	1.80E-144	518.5	Pseudomonas syringae group	EC:3.6.3.21	1	F:GO:0005524	F:ATP binding	K02028,K09972	map02010	E
	K0038_00988	ribosomal subunit interface protein		K0038_00988				K0038_01025		Major Facilitator Superfamily	2.50E-212	744.6	Pseudomonas syringae group		0			K03449		P
	K0038_00989	TonB-dependent siderophore receptor		K0038_00989	K02014			K0038_01026		SnoaL-like domain	4.20E-86	323.9	Pseudomonas syringae group		0			K06893		S
	K0038_00990	iron(III) dicitrate transport protein fecA		K0038_00990	K16091			K0038_01027	yhbQ	GIY-YIG catalytic domain	3.90E-43	180.6	Pseudomonas syringae group		4	F:GO:0004520; P:GO:0090305; P:GO:0006259; F:GO:0008296	P:nucleic acid phosphodiester bond hydrolysis; P:DNA metabolic process; F:endodeoxyribonuclease activity; F:3'-5'-exodeoxyribonuclease activity	K07461		L
	K0038_00991	regulatory protein, putative		K0038_00991	K07165			K0038_01028		Glutathione S-transferase, N-terminal domain	3.90E-165	587.4	Pseudomonas syringae group	EC:2.5.1.18	0			K00799	map00480,map00980,map00982,map00983,map01524,map05200,map05204,map05225,map05418	O
	K0038_00992	sigma-70 family RNA polymerase sigma factor		K0038_00992	K23514			K0038_01029		Histidine kinase	9.10E-243	846.7	Gammaproteobacteria		0					T
	K0038_00993	helix-turn-helix domain-containing protein		K0038_00993	K07506			K0038_01030		Glutaredoxin	1.70E-57	228.4	Pseudomonas syringae group		0			K03676		O
	K0038_00994	EamA family transporter		K0038_00994				K0038_01031	ndpA	Nucleoid-associated protein	7.50E-191	672.9	Pseudomonas syringae group		4	F:GO:0042802; F:GO:0003690; C:GO:0043590; F:GO:0003727	F:double-stranded DNA binding; F:identical protein binding; C:bacterial nucleoid; F:single-stranded RNA binding	K06899		S
	K0038_00995	D-isomer specific 2-hydroxyacid dehydrogenase family protein		K0038_00995	K00090			K0038_01032	hup	Belongs to the bacterial histone-like protein family	6.80E-41	172.9	Pseudomonas syringae group		0			K03530		L
	K0038_00996	transcriptional regulator, LysR family		K0038_00996				K0038_01033	rlmF	Specifically methylates the adenine in position 1618 of 23S rRNA	1.90E-178	631.7	Pseudomonas syringae group	EC:2.1.1.181	2	P:GO:0070475; F:GO:0052907	P:rRNA base methylation; F:23S rRNA (adenine(1618)-N(6))-methyltransferase activity	K06970		J
	K0038_00997	oxidoreductase, short chain dehydrogenase/reductase family		K0038_00997				K0038_01034	valS	amino acids such as threonine, to avoid such errors, it has a posttransfer editing activity that hydrolyzes mischarged Thr-tRNA(Val) in a tRNA-dependent manner	0.00E0	1874	Pseudomonas syringae group	EC:6.1.1.9	7	F:GO:0000287; F:GO:0004832; P:GO:0106074; P:GO:0061475; F:GO:0002161; P:GO:0045903; C:GO:0005829	F:aminoacyl-tRNA editing activity; F:magnesium ion binding; P:cytosolic valyl-tRNA aminoacylation; P:positive regulation of translational fidelity; F:valine-tRNA ligase activity; P:aminoacyl-tRNA metabolism involved in translational fidelity; C:cytosol	K01873	map00970	J
	K0038_00998	multidrug transporter		K0038_00998				K0038_01035			4.80E-41	174.1	Pseudomonas syringae group		0
	K0038_00999	hypothetical protein		K0038_00999				K0038_01036	holC	DNA polymerase III, chi subunit	1.00E-75	289.3	Pseudomonas syringae group	EC:2.7.7.7	3	P:GO:0009314; P:GO:0032298; C:GO:0043847	P:response to radiation; P:positive regulation of DNA-dependent DNA replication initiation; C:DNA polymerase III, clamp loader chi/psi subcomplex	K02339	map00230,map00240,map01100,map03030,map03430,map03440	L
	K0038_01000	toxin		K0038_01000	K11021			K0038_01037	pepA	Presumably involved in the processing and regular turnover of intracellular proteins. Catalyzes the removal of unsubstituted N-terminal amino acids from various peptides	4.20E-270	936.8	Pseudomonas syringae group	EC:3.4.11.1	11	F:GO:0003677; P:GO:0031564; P:GO:0006355; P:GO:0006276; F:GO:0097718; P:GO:0043171; P:GO:0006508; P:GO:0042150; F:GO:0004177; C:GO:0005739; F:GO:0001073	P:peptide catabolic process; P:transcription antitermination; C:mitochondrion; P:plasmid maintenance; F:aminopeptidase activity; P:plasmid recombination; P:proteolysis; F:transcription antitermination factor activity, DNA binding; P:regulation of transcription, DNA-templated; F:disordered domain specific binding; F:DNA binding	K01255	map00480,map01100	E
	K0038_01001	mannose-1-phosphate guanylyltransferase/mannose-6-phosphate isomerase		K0038_01001	K16011			K0038_01038	lptF	Permease	4.20E-166	590.9	Gammaproteobacteria		8	F:GO:0016887; F:GO:0034040; C:GO:1904949; F:GO:0015437; C:GO:0043190; P:GO:0055085; F:GO:0015221; P:GO:0015920	F:ATPase-coupled lipid transmembrane transporter activity; F:lipopolysaccharide floppase activity; P:lipopolysaccharide transport; F:ATP hydrolysis activity; F:lipopolysaccharide transmembrane transporter activity; C:ATP-binding cassette (ABC) transporter complex; C:ATPase complex; P:transmembrane transport	K07091,K11720	map02010	S
	K0038_01002	alginate biosynthesis protein AlgF		K0038_01002	K19296			K0038_01039	lptG	Predicted permease YjgP/YjgQ family	1.50E-189	668.7	Pseudomonas syringae group		3	C:GO:1904949; C:GO:0043190; P:GO:0015920	P:lipopolysaccharide transport; C:ATP-binding cassette (ABC) transporter complex; C:ATPase complex	K11720	map02010	S
	K0038_01003	alginate biosynthesis protein AlgJ		K0038_01003	K19295			K0038_01041	tapB	Cold shock	5.10E-33	146.4	Pseudomonas syringae group		0			K03704		K
	K0038_01004	alginate biosynthesis protein AlgI		K0038_01004	K19294			K0038_01042	gcvT	Glycine cleavage system T protein	2.80E-194	684.5	Pseudomonas syringae group	EC:2.1.2.10; EC:2.1.2.1	7	P:GO:0042178; P:GO:0042135; P:GO:0032259; C:GO:0005960; F:GO:0004047; P:GO:0019464; F:GO:0008483	F:aminomethyltransferase activity; P:neurotransmitter catabolic process; C:glycine cleavage complex; P:glycine decarboxylation via glycine cleavage system; F:transaminase activity; P:xenobiotic catabolic process; P:methylation	K00600,K00605	map00260,map00460,map00630,map00670,map00680,map01100,map01110,map01120,map01130,map01200,map01230,map01523	E
	K0038_01005	poly(beta-D-mannuronate) lyase		K0038_01005	K01729			K0038_01043	gcvP	The glycine cleavage system catalyzes the degradation of glycine. The P protein binds the alpha-amino group of glycine through its pyridoxal phosphate cofactor	0.00E0	1865.5	Pseudomonas syringae group	EC:1.4.4.2	3	C:GO:0005886; C:GO:0005618; P:GO:0040007	C:cell wall; P:growth; C:plasma membrane	K00281,K00282	map00260,map00630,map01100,map01110,map01130,map01200	E
	K0038_01006	Alginate biosynthesis protein AlgX		K0038_01006	K19293			K0038_01044	gcvH	The glycine cleavage system catalyzes the degradation of glycine. The H protein shuttles the methylamine group of glycine from the P protein to the T protein	2.50E-62	244.6	Pseudomonas syringae group		0			K02437	map00260,map00630,map01100,map01110,map01130,map01200	E
	K0038_01007	alginate biosynthesis protein AlgG		K0038_01007	K01795			K0038_01045		Outer membrane efflux protein	2.20E-245	854.7	Pseudomonas syringae group		0			K03287		MU
	K0038_01008	alginate export porin		K0038_01008	K16081			K0038_01046		Domain of unknown function (DUF4347)	0.00E0	2591.2	Pseudomonas fluorescens group		0					U
	K0038_01009	alginate biosynthesis protein AlgK		K0038_01009	K19292			K0038_01047	raxST	Sulfotransferase family	1.50E-139	502.3	Pseudomonas syringae group		0			K13472	map04626	E
	K0038_01010	alginate biosynthesis protein Alg44		K0038_01010	K19291			K0038_01048		Phage Tail Collar Domain	1.00E-70	273.1	Pseudomonas syringae group		0					S
	K0038_01011	mannuronan synthase		K0038_01011	K19290			K0038_01049			3.40E-25	120.9	Pseudomonas fluorescens group		0
	K0038_01012	GDP-mannose 6-dehydrogenase AlgD		K0038_01012	K00066			K0038_01050		Acetyltransferase (GNAT) domain	3.80E-74	284.3	Pseudomonas syringae group		0					K
	K0038_01013	hypothetical protein		K0038_01013	K09861			K0038_01051		Peptidase M50	0.00E0	1237.2	Gammaproteobacteria		0			K01993,K13408,K16922	map04626	M
	K0038_01014	polysaccharide deacetylase family protein		K0038_01014				K0038_01052		Multidrug transporter	4.10E-213	747.3	Gammaproteobacteria		0			K01993,K16922		M
	K0038_01015	PhoH-like protein		K0038_01015	K07175			K0038_01053		Belongs to the membrane fusion protein (MFP) (TC 8.A.1) family	9.20E-104	383.3	Pseudomonas fluorescens group		0					M
	K0038_01016	molybdenum cofactor biosynthesis protein C		K0038_01016	K03637			K0038_01054		Sensory box protein response regulator	0.00E0	1303.1	Pseudomonas syringae group		0					T
	K0038_01017	molybdenum cofactor biosynthesis protein D		K0038_01017	K03636			K0038_01055	divK	Response regulator receiver	4.70E-56	223.8	Gammaproteobacteria		0			K11443	map02020,map04112	T
	K0038_01018	molybdenum cofactor biosynthesis protein MoaE		K0038_01018	K03635			K0038_01056		PhoQ Sensor	9.50E-311	1072	Proteobacteria		0					T
	K0038_01019	ATP-dependent RNA helicase RhlB		K0038_01019	K03732			K0038_01057	tyrR	Sigma-54 interaction domain	1.90E-278	964.5	Pseudomonas syringae group		5	F:GO:0005524; F:GO:0003677; P:GO:0045892; P:GO:0010629; C:GO:0005829	P:negative regulation of gene expression; P:negative regulation of transcription, DNA-templated; F:ATP binding; F:DNA binding; C:cytosol	K03721		K
	K0038_01020	alpha/beta hydrolase		K0038_01020	K06999			K0038_01058		Domain of unknown function (DUF5064)	4.70E-55	220.3	Pseudomonas syringae group		0					S
	K0038_01021	amino acid ABC transporter, periplasmic amino acid-binding protein		K0038_01021	K09969			K0038_01059	ybaN	Protein of unknown function (DUF454)	1.60E-79	302	Pseudomonas syringae group		0			K09790		S
	K0038_01022	amino acid ABC transporter, permease protein		K0038_01022	K09970			K0038_01060	hemO	Heme oxygenase	4.30E-88	330.9	Pseudomonas syringae group	EC:1.14.99.58	0			K07215	map00860	P
	K0038_01023	amino acid ABC transporter, permease protein		K0038_01023	K09971			K0038_01061	phuR	receptor	0.00E0	1460.7	Pseudomonas syringae group		0			K16087		M
	K0038_01024	phosphate ABC transporter ATP-binding protein		K0038_01024	K09972			K0038_01062		Domain of unknown function (DUF4974)	9.10E-141	506.5	Pseudomonas syringae group		0			K07165		PT
	K0038_01025	MFS transporter		K0038_01025	K03449			K0038_01063		Belongs to the sigma-70 factor family. ECF subfamily	2.30E-80	305.1	Pseudomonas syringae group		0			K03088		K
	K0038_01026	hypothetical protein		K0038_01026				K0038_01064	gapA	Belongs to the glyceraldehyde-3-phosphate dehydrogenase family	8.00E-185	652.9	Pseudomonas syringae group	EC:1.2.1.12	0			K00134	map00010,map00710,map01100,map01110,map01120,map01130,map01200,map01230,map04066,map05010	C
	K0038_01027	GIY-YIG nuclease family protein		K0038_01027	K07461			K0038_01065	edd	Belongs to the IlvD Edd family	0.00E0	1202.6	Pseudomonas syringae group	EC:4.2.1.12	2	F:GO:0004456; P:GO:0046177	F:phosphogluconate dehydratase activity; P:D-gluconate catabolic process	K01690	map00030,map01100,map01120,map01200	EG
	K0038_01028	hypothetical protein		K0038_01028				K0038_01066	glk	Belongs to the bacterial glucokinase family	5.90E-177	626.7	Pseudomonas syringae group	EC:2.7.1.2	12	P:GO:0034404; P:GO:0019359; P:GO:0051156; P:GO:0009168; P:GO:0009166; F:GO:0004340; P:GO:0006096; P:GO:0006805; P:GO:0046835; P:GO:0006754; P:GO:0042866; C:GO:0005829	P:ATP biosynthetic process; P:nicotinamide nucleotide biosynthetic process; P:pyruvate biosynthetic process; P:nucleobase-containing small molecule biosynthetic process; F:glucokinase activity; P:carbohydrate phosphorylation; P:glycolytic process; P:purine ribonucleoside monophosphate biosynthetic process; P:glucose 6-phosphate metabolic process; P:xenobiotic metabolic process; P:nucleotide catab…	K00845	map00010,map00052,map00500,map00520,map00521,map00524,map01100,map01110,map01120,map01130,map01200	H
	K0038_01029	histidine kinase		K0038_01029				K0038_01067		COG0745 Response regulators consisting of a CheY-like receiver domain and a winged-helix DNA-binding domain	5.10E-136	490.3	Pseudomonas syringae group		0					K
	K0038_01030	Glutaredoxin		K0038_01030				K0038_01068		PhoQ Sensor	6.90E-259	899.4	Pseudomonas syringae group		0					T
	K0038_01031	putative nucleoid-associated protein		K0038_01031	K06899			K0038_01069	gtsA	Glucose ABC transporter periplasmic glucose-binding protein	6.00E-241	839.7	Pseudomonas syringae group		0			K17315	map02010	G
	K0038_01032	dipicolinate synthase		K0038_01032	K03530			K0038_01070	gtsB	ABC transporter permease	5.20E-167	593.6	Pseudomonas syringae group		0			K15771,K17316	map02010	P
	K0038_01033	Putative ribosomal RNA small subunit methyltransferase J		K0038_01033	K06970			K0038_01071	gtsC	Permease	2.60E-152	544.7	Pseudomonas syringae group		0			K17317	map02010	P
	K0038_01034	valyl-tRNA synthetase		K0038_01034	K01873			K0038_01072	gtsD	Belongs to the ABC transporter superfamily	3.20E-209	734.2	Pseudomonas syringae group		0			K10112	map02010	P
	K0038_01035	DNA polymerase III subunit chi		K0038_01035				K0038_01073	oprB	Carbohydrate-selective porin, OprB family	5.70E-266	922.9	Pseudomonas syringae group		1	C:GO:0009279	C:cell outer membrane	K07267		M
	K0038_01036	DNA polymerase III, chi subunit		K0038_01036	K02339			K0038_01074	yeaD	Aldose 1-epimerase	1.80E-156	558.5	Pseudomonas syringae group	EC:5.1.3.15; EC:4.2.1.9	2	P:GO:0006974; C:GO:0005829	P:cellular response to DNA damage stimulus; C:cytosol	K01687,K01792	map00010,map00290,map00770,map01100,map01110,map01120,map01130,map01210,map01230	G
	K0038_01037	cytosol aminopeptidase		K0038_01037	K01255			K0038_01075	hexR	Helix-turn-helix domain, rpiR family	1.60E-149	535.4	Pseudomonas syringae group		7	C:GO:0032993; P:GO:0045892; P:GO:0010629; F:GO:0000976; F:GO:0001217; P:GO:0006974; C:GO:0005829	P:negative regulation of gene expression; P:negative regulation of transcription, DNA-templated; P:cellular response to DNA damage stimulus; C:protein-DNA complex; F:DNA-binding transcription repressor activity; F:transcription cis-regulatory region binding; C:cytosol	K19337		K
	K0038_01038	membrane protein, putative		K0038_01038	K07091			K0038_01076	zwf	Catalyzes the oxidation of glucose 6-phosphate to 6- phosphogluconolactone	1.50E-285	988	Pseudomonas syringae group	EC:1.1.1.363; EC:1.1.1.49	9	F:GO:0042802; P:GO:0019682; P:GO:0019693; P:GO:0006098; F:GO:0004345; P:GO:0046496; P:GO:0009372; P:GO:0006006; C:GO:0005829	P:ribose phosphate metabolic process; P:quorum sensing; P:glyceraldehyde-3-phosphate metabolic process; F:identical protein binding; P:nicotinamide nucleotide metabolic process; P:glucose metabolic process; F:glucose-6-phosphate dehydrogenase activity; P:pentose-phosphate shunt; C:cytosol	K00036	map00030,map00480,map01100,map01110,map01120,map01130,map01200,map05230	G
	K0038_01039	membrane protein, putative		K0038_01039	K11720			K0038_01077	pgl	6-phosphogluconolactonase	2.40E-119	434.9	Pseudomonas syringae group	EC:3.1.1.31; EC:5.3.1.9	0			K01057,K01810	map00010,map00030,map00500,map00520,map01100,map01110,map01120,map01130,map01200	G
	K0038_01041	cold-shock protein		K0038_01041	K03704			K0038_01078	eda	Aldolase	5.20E-119	433.7	Pseudomonas syringae group	EC:4.1.2.14; EC:4.1.3.42	6	F:GO:0008948; F:GO:0042802; F:GO:0008700; F:GO:0008675; F:GO:0106009; C:GO:0005829	F:(4S)-4-hydroxy-2-oxoglutarate aldolase activity; F:oxaloacetate decarboxylase activity; F:identical protein binding; F:4-hydroxy-2-oxoglutarate aldolase activity; F:2-dehydro-3-deoxy-phosphogluconate aldolase activity; C:cytosol	K01625	map00030,map00630,map01100,map01120,map01200	G
	K0038_01042	glycine cleavage system T protein		K0038_01042	K00605			K0038_01079	ypeB	Putative quorum-sensing-regulated virulence factor	8.40E-40	169.1	Pseudomonas syringae group	EC:2.7.7.7	0			K02342,K09954,K10857	map00230,map00240,map01100,map03030,map03430,map03440	S
	K0038_01043	glycine dehydrogenase		K0038_01043	K00281			K0038_01080		Domain of unknown function (DUF2383)	2.90E-68	264.6	Pseudomonas syringae group	EC:1.16.3.1	0			K03594	map00860	S
	K0038_01044	glycine cleavage system H protein		K0038_01044	K02437			K0038_01081		Cache domain	3.20E-249	867.5	Pseudomonas syringae group		0					T
	K0038_01045	transporter		K0038_01045				K0038_01082		Member of a two-component regulatory system	9.10E-240	835.9	Pseudomonas syringae group	EC:2.7.13.3	0			K02484,K07644,K07649	map02020	T
	K0038_01046	hypothetical protein		K0038_01046				K0038_01083		DNA-binding heavy metal response regulator	2.90E-122	444.5	Pseudomonas syringae group		0					K
	K0038_01047	sulfotransferase		K0038_01047	K13472			K0038_01084	MA20_27115	Protein export membrane protein	0.00E0	1866.7	Pseudomonas syringae group		0			K03296,K21133		V
	K0038_01048	phage tail protein		K0038_01048				K0038_01085		Belongs to the membrane fusion protein (MFP) (TC 8.A.1) family	1.10E-180	639.4	Pseudomonas syringae group		0			K21135		M
	K0038_01049	putative protein		K0038_01049				K0038_01086			3.10E-28	131.3	Pseudomonas syringae group		0
	K0038_01050	GNAT family N-acetyltransferase		K0038_01050				K0038_01087	ybgD	Fimbrial protein	3.90E-91	340.9	Pseudomonas syringae group		0			K07345	map05133	NU
	K0038_01051	biotin/lipoyl-binding protein		K0038_01051	K16922			K0038_01088	lpfB	Assembly	1.80E-99	369	Proteobacteria		0			K07346		M
	K0038_01052	HlyD family efflux transporter periplasmic adaptor subunit		K0038_01052				K0038_01089	lpfC	outer membrane usher protein	0.00E0	1397.9	Pseudomonas syringae group		0			K07347	map05133	NU
	K0038_01053	Membrane-fusion protein		K0038_01053				K0038_01090	lpfB	Pili and flagellar-assembly chaperone, PapD N-terminal domain	1.70E-110	405.6	Pseudomonas syringae group		0			K07346,K15540		NU
	K0038_01054	sensory box protein/response regulator		K0038_01054				K0038_01091	etfD	Fimbrial protein	1.40E-160	572.4	Pseudomonas syringae group		0			K07345	map05133	NU
	K0038_01055	response regulator		K0038_01055	K11443			K0038_01092			8.50E-42	176	Pseudomonas syringae group		0
	K0038_01056	two-component hybrid sensor and regulator		K0038_01056				K0038_01093		Putative zinc- or iron-chelating domain	9.50E-122	443	Pseudomonas syringae group		0			K06940		S
	K0038_01057	Fis family transcriptional regulator		K0038_01057	K03721			K0038_01094		FR47-like protein	1.30E-62	246.1	Pseudomonas syringae group		0					K
	K0038_01058	hypothetical protein		K0038_01058				K0038_01095	cheV3	chemotaxis	5.70E-158	563.5	Pseudomonas syringae group	EC:2.7.13.3	0			K03407,K03408,K03415	map02020,map02030	T
	K0038_01059	hypothetical protein		K0038_01059	K09790			K0038_01096	dsbB	Required for disulfide bond formation in some periplasmic proteins. Acts by oxidizing the DsbA protein	5.10E-87	327	Pseudomonas syringae group		0			K03611		C
	K0038_01060	biliverdin-producing heme oxygenase		K0038_01060	K07215			K0038_01097	cyoA	subunit 2	3.80E-168	597.4	Pseudomonas syringae group	EC:1.10.3.10; EC:1.10.3.12	14	P:GO:0009205; P:GO:0009167; P:GO:0006805; F:GO:0016682; F:GO:0015078; P:GO:0015990; P:GO:0042773; P:GO:0016310; C:GO:0009319; F:GO:0048039; P:GO:0009150; F:GO:0009486; P:GO:0019646; C:GO:0071575	P:purine ribonucleoside monophosphate metabolic process; P:purine ribonucleotide metabolic process; F:oxidoreductase activity, acting on diphenols and related substances as donors, oxygen as acceptor; P:aerobic electron transport chain; F:cytochrome bo3 ubiquinol oxidase activity; F:ubiquinone binding; P:purine ribonucleoside triphosphate metabolic process; P:electron transport coupled proton tra…	K02297,K02826	map00190,map01100	C
	K0038_01061	TonB-dependent hemoglobin/transferrin/lactoferrin family receptor		K0038_01061	K16087			K0038_01098	cyoB	Belongs to the heme-copper respiratory oxidase family	0.00E0	1340.5	Pseudomonas syringae group	EC:1.10.3.10; EC:1.9.3.1; EC:1.10.3.12	0			K02274,K02298,K02827	map00190,map01100	C
	K0038_01062	FecR domain-containing protein		K0038_01062	K07165			K0038_01099	cyoC	Cytochrome O ubiquinol oxidase	1.70E-100	372.1	Pseudomonas syringae group		6	P:GO:0015990; C:GO:0009319; C:GO:0005887; F:GO:0015078; F:GO:0009486; P:GO:0019646	C:integral component of plasma membrane; P:electron transport coupled proton transport; F:proton transmembrane transporter activity; C:cytochrome o ubiquinol oxidase complex; P:aerobic electron transport chain; F:cytochrome bo3 ubiquinol oxidase activity	K02299	map00190,map01100	C
	K0038_01063	RNA polymerase sigma-70 family protein		K0038_01063				K0038_01100	cyoD	Cytochrome O ubiquinol oxidase	7.30E-50	203	Pseudomonas syringae group		6	P:GO:0015990; C:GO:0009319; C:GO:0005887; F:GO:0015078; F:GO:0009486; P:GO:0019646	C:integral component of plasma membrane; P:electron transport coupled proton transport; F:proton transmembrane transporter activity; C:cytochrome o ubiquinol oxidase complex; P:aerobic electron transport chain; F:cytochrome bo3 ubiquinol oxidase activity	K02300	map00190,map01100	C
	K0038_01064	glyceraldehyde 3-phosphate dehydrogenase, type I		K0038_01064	K00134			K0038_01101	cyoE	Converts heme B (protoheme IX) to heme O by substitution of the vinyl group on carbon 2 of heme B porphyrin ring with a hydroxyethyl farnesyl side group	1.20E-155	555.8	Pseudomonas syringae group	EC:2.5.1.141	4	P:GO:0006783; P:GO:0045333; F:GO:0004311; C:GO:0005886	P:heme biosynthetic process; F:farnesyltranstransferase activity; P:cellular respiration; C:plasma membrane	K02257	map00190,map00860,map01100,map01110,map04714	H
	K0038_01065	6-phosphogluconate dehydratase		K0038_01065	K01690			K0038_01102		Glycosyl transferase group 2 family protein	2.60E-147	528.1	Pseudomonas syringae group		0			K12987		M
	K0038_01066	glucokinase		K0038_01066	K00845			K0038_01103	cat	Bacterial transferase hexapeptide (six repeats)	1.20E-98	365.9	Pseudomonas syringae group	EC:2.3.1.28	0			K00638,K18234		S
	K0038_01067	DNA-binding response regulator		K0038_01067	K02483			K0038_01104	ilvE	Branched-chain-amino-acid aminotransferase	1.30E-195	688.7	Pseudomonas syringae group	EC:2.6.1.42	0			K00826	map00270,map00280,map00290,map00770,map01100,map01110,map01130,map01210,map01230	E
	K0038_01068	sensor histidine kinase		K0038_01068				K0038_01105			1.20E-164	585.9	Pseudomonas syringae group		0
	K0038_01069	glucose-binding protein		K0038_01069	K17315			K0038_01106	pheC	Bacterial periplasmic substrate-binding proteins	9.60E-141	506.1	Pseudomonas syringae group	EC:4.2.1.51; EC:4.2.1.91	0			K01713,K02030	map00400,map01100,map01110,map01130,map01230	ET
	K0038_01070	glucose ABC transporter membrane protein		K0038_01070	K17316			K0038_01107		transcriptional	3.60E-48	197.2	Pseudomonas syringae group		0					K
	K0038_01071	glucose ABC transporter, permease protein, putative		K0038_01071	K17317			K0038_01108		Zinc-binding dehydrogenase	7.30E-186	656.4	Pseudomonas syringae group		0					C
	K0038_01072	glucose ABC transporter ATP-binding protein		K0038_01072	K10112			K0038_01109	sodC	Destroys radicals which are normally produced within the cells and which are toxic to biological systems	1.10E-93	349.4	Gammaproteobacteria	EC:1.15.1.1	1	C:GO:0042597	C:periplasmic space	K04565	map04146,map04213,map05014,map05016,map05020	P
	K0038_01073	porin B		K0038_01073	K07267			K0038_01110		Domain of unknown function (DUF1835)	3.10E-178	631.3	Pseudomonas syringae group		0					S
	K0038_01074	hypothetical protein		K0038_01074				K0038_01111		Protein of unknown function (DUF2945)	6.40E-28	129.4	Pseudomonas syringae group		0					S
	K0038_01075	hex regulon repressor		K0038_01075	K19337			K0038_01112	gnl	Gluconolactonase	8.50E-166	589.7	Pseudomonas syringae group	EC:3.1.1.17	0			K01053	map00030,map00053,map00930,map01100,map01110,map01120,map01130,map01200,map01220	G
	K0038_01076	glucose-6-phosphate 1-dehydrogenase		K0038_01076	K00036			K0038_01113		Motif C-terminal to PAS motifs (likely to contribute to PAS structural domain)	8.30E-219	766.1	Pseudomonas syringae group		0					T
	K0038_01077	6-phosphogluconolactonase		K0038_01077	K01057			K0038_01114		GntP family permease	2.80E-236	824.3	Pseudomonas syringae group		0			K03299		EG
	K0038_01078	4-hydroxy-2-oxoglutarate aldolase/2-dehydro-3-deoxyphosphogluconate		K0038_01078	K01625			K0038_01115			2.30E-30	137.9	Pseudomonas syringae group		0
	K0038_01079	hypothetical protein		K0038_01079	K09954			K0038_01116		Zeta toxin	5.50E-106	390.6	Pseudomonas syringae group		0					S
	K0038_01080	chemotaxis protein		K0038_01080				K0038_01117		Putative diguanylate phosphodiesterase	0.00E0	1254.2	Pseudomonas syringae group		0					T
	K0038_01081	diguanylate cyclase		K0038_01081				K0038_01118			1.40E-41	175.3	Pseudomonas syringae group		0
	K0038_01082	two-component sensor histidine kinase		K0038_01082	K07644			K0038_01119		GAF domain	4.00E-100	371.7	Proteobacteria	EC:2.7.8.41; EC:2.7.13.3	0			K07716,K08744	map00564,map01100,map02020,map04112	T
	K0038_01083	DNA-binding heavy metal response regulator		K0038_01083	K07665			K0038_01120		Transcriptional regulator	1.30E-117	429.1	Pseudomonas syringae group		0					K
	K0038_01084	multidrug efflux RND transporter permease subunit		K0038_01084	K21133			K0038_01121		Protein of unknown function (DUF3225)	2.10E-67	261.5	Gammaproteobacteria		0					S
	K0038_01085	efflux RND transporter periplasmic adaptor subunit		K0038_01085	K21135			K0038_01122	rutB	Isochorismatase family	1.50E-110	405.6	Pseudomonas syringae group	EC:3.5.1.110	0			K09020	map00240,map01100	Q
	K0038_01086	protein of unknown function		K0038_01086				K0038_01123		ABC transporter, ATP-binding protein	2.40E-265	921	Pseudomonas syringae group	EC:3.6.3.17	0			K02056		S
	K0038_01087	fimbrial protein		K0038_01087				K0038_01124	rutB	Isochorismatase family	3.30E-129	467.6	Pseudomonas syringae group		0					Q
	K0038_01088	pili assembly chaperone:Bacterial pili assembly chaperone		K0038_01088	K15540			K0038_01125	amiF	Is an aliphatic amidase with a restricted substrate specificity, as it only hydrolyzes formamide	2.00E-202	711.4	Pseudomonas syringae group	EC:3.5.1.49	1	F:GO:0004040	F:amidase activity	K01455	map00460,map00630,map00910,map01200	S
	K0038_01089	fimbria/pilus outer membrane usher protein		K0038_01089	K07347			K0038_01126	rbsC-2	Belongs to the binding-protein-dependent transport system permease family	2.70E-163	581.3	Pseudomonas syringae group		0			K02057		P
	K0038_01090	fimbria/pilus periplasmic chaperone		K0038_01090				K0038_01127		Belongs to the binding-protein-dependent transport system permease family	3.60E-186	657.5	Pseudomonas syringae group		0			K02057		P
	K0038_01091	fimbrial protein		K0038_01091				K0038_01128		ABC-type transport system, periplasmic component surface lipoprotein	2.00E-208	731.5	Gammaproteobacteria		0			K02058,K07335		S
	K0038_01092	hypothetical protein		K0038_01092				K0038_01129	atzF	Amidase	6.10E-308	1062.8	Pseudomonas syringae group	EC:3.5.1.4; EC:3.5.1.54	0			K01426,K01457	map00220,map00330,map00360,map00380,map00627,map00643,map00791,map01100,map01120	J
	K0038_01093	YkgJ family cysteine cluster protein		K0038_01093				K0038_01130			6.90E-31	139.4	Pseudomonas fluorescens group		0
	K0038_01094	Mycothiol acetyltransferase		K0038_01094				K0038_01131		glyoxalase bleomycin resistance protein dioxygenase	8.30E-66	256.1	Pseudomonas syringae group		0					E
	K0038_01095	chemotaxis protein CheV, putative		K0038_01095	K03415			K0038_01132		Major facilitator Superfamily	6.20E-247	859.8	Pseudomonas syringae group		0			K06609		EGP
	K0038_01096	dihydrokaempferol 4-reductase		K0038_01096	K03611			K0038_01133		SnoaL-like polyketide cyclase	6.10E-54	216.9	Pseudomonas syringae group		0					S
	K0038_01097	cytochrome o ubiquinol oxidase, subunit II		K0038_01097	K02297			K0038_01134	gstA	Belongs to the GST superfamily	7.40E-112	409.8	Gammaproteobacteria	EC:2.5.1.18	0			K00799	map00480,map00980,map00982,map00983,map01524,map05200,map05204,map05225,map05418	O
	K0038_01098	cytochrome o ubiquinol oxidase, subunit I		K0038_01098	K02298			K0038_01135		Protein of unknown function (DUF2986)	2.90E-12	77	Pseudomonas syringae group		0					S
	K0038_01099	cytochrome o ubiquinol oxidase subunit III		K0038_01099	K02299			K0038_01136		AAA domain	1.50E-64	252.3	Pseudomonas syringae group		0					S
	K0038_01100	cytochrome o ubiquinol oxidase, subunit IV		K0038_01100	K02300			K0038_01137		PhoQ Sensor	8.10E-132	476.9	Gammaproteobacteria		0					T
	K0038_01101	protoheme IX farnesyltransferase		K0038_01101	K02257			K0038_01138		KaiC	6.60E-260	902.9	Pseudomonas syringae group		0			K08482		T
	K0038_01102	Putative glycosyltransferase EpsE		K0038_01102	K12987			K0038_01139			8.10E-41	173.3	Proteobacteria		0
	K0038_01103	antibiotic acetyltransferase		K0038_01103				K0038_01140		Carboxylesterase family	3.10E-138	498	Pseudomonas syringae group		0					I
	K0038_01104	branched-chain amino acid aminotransferase		K0038_01104	K00826			K0038_01141	IV02_09720	Transketolase, pyrimidine binding domain	2.40E-184	651.4	Pseudomonas syringae group	EC:2.2.1.1	0			K00615	map00030,map00710,map01051,map01100,map01110,map01120,map01130,map01200,map01230	G
	K0038_01105	ATPase		K0038_01105				K0038_01142	tktB	Dehydrogenase E1 component	4.90E-159	567	Pseudomonas syringae group	EC:2.2.1.1	0			K00615	map00030,map00710,map01051,map01100,map01110,map01120,map01130,map01200,map01230	G
	K0038_01106	transporter substrate-binding domain-containing protein		K0038_01106	K01713			K0038_01143		COG0477 Permeases of the major facilitator superfamily	1.90E-242	844.7	Pseudomonas syringae group		0			K13021		G
	K0038_01107	transcriptional regulator, ArsR family		K0038_01107				K0038_01144		COG1028 Dehydrogenases with different specificities (related to short-chain alcohol dehydrogenases)	8.00E-129	466.5	Pseudomonas syringae group		0					IQ
	K0038_01108	oxidoreductase, zinc-binding protein		K0038_01108				K0038_01145		Bacterial regulatory helix-turn-helix protein, lysR family	4.30E-161	573.9	Pseudomonas syringae group		0			K03566	map02026	K
	K0038_01109	Superoxide dismutase [Cu-Zn] 1		K0038_01109	K04565			K0038_01146	yneE	Bestrophin, RFP-TM, chloride channel	6.20E-163	580.1	Pseudomonas syringae group		1	C:GO:0005886	C:plasma membrane	K08994		S
	K0038_01110	hypothetical protein		K0038_01110				K0038_01147	hrpW	Pectate lyase	2.40E-122	445.7	Pseudomonas syringae group	EC:4.2.2.2; EC:4.2.2.10	0			K19551	map00040	G
	K0038_01111	HVA1 family protein		K0038_01111				K0038_01148			1.80E-112	412.1	Gammaproteobacteria		0
	K0038_01112	gluconolactonase		K0038_01112	K01053			K0038_01149		Tir chaperone protein (CesT) family	1.10E-62	245.7	Pseudomonas syringae group		0					S
	K0038_01113	diguanylate cyclase		K0038_01113				K0038_01150	dspE	Pathogenicity factor	0.00E0	2452.9	Pseudomonas syringae group		0					S
	K0038_01114	Gnt-II system L-idonate transporter		K0038_01114				K0038_01151	mltD	Lytic murein transglycosylase	3.20E-182	644.8	Pseudomonas syringae group		5	C:GO:0016020; C:GO:0030288; F:GO:0008932; P:GO:0009893; P:GO:0051353	C:membrane; F:lytic endotransglycosylase activity; P:positive regulation of oxidoreductase activity; P:positive regulation of metabolic process; C:outer membrane-bounded periplasmic space	K08307		M
	K0038_01115	hypothetical protein		K0038_01115				K0038_01152	hrpS	Type III transcriptional regulator	1.70E-160	572	Pseudomonas syringae group		0			K02688		K
	K0038_01116	zeta toxin family protein		K0038_01116				K0038_01153	hrpS	Bacterial regulatory protein, Fis family	1.70E-149	535.4	Pseudomonas syringae group		0			K02688		K
	K0038_01117	EAL domain-containing protein		K0038_01117				K0038_01154		HrpA pilus formation protein	6.10E-44	183.3	Pseudomonas syringae group		2	C:GO:0005615; C:GO:0009289	C:extracellular space; C:pilus			S
	K0038_01118	hypothetical protein		K0038_01118				K0038_01155		HrpZ	1.90E-86	326.2	Pseudomonas syringae group		0					O
	K0038_01119	chemotaxis protein CheR		K0038_01119				K0038_01156	hrpB	Type III secretion basal body protein I, YscI, HrpB, PscI	2.60E-48	198	Pseudomonas syringae group		0					S
	K0038_01120	GntR family transcriptional regulator		K0038_01120				K0038_01157	hrcJ	Secretory protein of YscJ/FliF family	9.50E-128	463	Pseudomonas syringae group		0			K03222	map03070	U
	K0038_01121	hypothetical protein		K0038_01121				K0038_01158	hrpD		2.90E-77	294.7	Pseudomonas syringae group		0
	K0038_01122	isochorismatase family protein		K0038_01122				K0038_01159	fliH	HrpE/YscL/FliH and V-type ATPase subunit E	4.70E-68	264.2	Pseudomonas syringae group		0			K02411,K03223	map02040,map03070	NU
	K0038_01123	ABC transporter ATP-binding protein		K0038_01123	K23537			K0038_01160		HrpF protein	1.20E-27	128.6	Pseudomonas syringae group		0					S
	K0038_01124	isochorismatase family protein		K0038_01124	K23359			K0038_01161			2.70E-60	238	Pseudomonas syringae group		0
	K0038_01125	formamidase		K0038_01125	K01455			K0038_01162	hrcC	Bacterial type II and III secretion system protein	0.00E0	1289.2	Pseudomonas syringae group		0			K03219	map03070	NU
	K0038_01126	ABC transporter, permease protein		K0038_01126	K23536			K0038_01163			4.00E-27	126.7	Pseudomonas syringae group		0
	K0038_01127	ABC transporter permease		K0038_01127	K23535			K0038_01164		Negative regulator of hrp expression HrpV	1.40E-51	208.8	Pseudomonas syringae group		0					S
	K0038_01128	bmp family protein		K0038_01128	K07335			K0038_01165	hrcU	Type III secretion	1.10E-179	636	Pseudomonas syringae group		0			K03229,K22510	map03070	U
	K0038_01129	allophanate hydrolase		K0038_01129	K01457			K0038_01166	hrcT	Bacterial export proteins, family 1	1.90E-133	481.9	Pseudomonas syringae group		0			K02421,K03228	map02040,map03070	U
	K0038_01130	phage integrase		K0038_01130				K0038_01167	hrcS	Bacterial export proteins, family 3	2.50E-37	161	Pseudomonas syringae group		0			K03227	map03070	U
	K0038_01131	hypothetical protein		K0038_01131				K0038_01168	ssaR	FliP family	3.70E-106	391	Pseudomonas syringae group		0			K03226,K22507	map03070	U
	K0038_01132	MFS transporter, sugar porter (SP) family		K0038_01132	K06609			K0038_01169	hrcQ	Type III flagellar switch regulator (C-ring) FliN C-term	2.80E-32	144.8	Pseudomonas syringae group		0			K03225	map03070	NU
	K0038_01133	hypothetical protein		K0038_01133				K0038_01170	hrcQ	Type III secretion	1.00E-104	386.3	Pseudomonas syringae group		0			K03225	map03070	NU
	K0038_01134	glutathione S-transferase		K0038_01134	K00799			K0038_01171		Flagellar hook-length control protein FliK	1.10E-66	259.6	Pseudomonas syringae group		0					S
	K0038_01135	hypothetical protein		K0038_01135				K0038_01172	hrpO		5.30E-64	250.4	Pseudomonas syringae group		0
	K0038_01136	AAA family ATPase		K0038_01136				K0038_01173	hrcN	Type III	4.80E-241	840.1	Pseudomonas syringae group	EC:3.6.3.14	0			K03224	map03070	NU
	K0038_01137	sensor histidine kinase		K0038_01137				K0038_01174	hrpQ	Inner membrane component of T3SS, cytoplasmic domain	6.10E-145	520.4	Pseudomonas syringae group	EC:4.6.1.1	0			K01768,K03220,K10914	map00230,map02020,map02024,map02025,map02026,map04113,map04213,map05111	T
	K0038_01138	AAA family ATPase		K0038_01138	K08482			K0038_01175	hrcV	FHIPEP family	0.00E0	1251.9	Pseudomonas syringae group		0			K03230	map03070	U
	K0038_01139	putative protein		K0038_01139				K0038_01176	hrpJ	HrpJ-like domain	2.90E-183	647.9	Pseudomonas syringae group		0			K04058	map03070	S
	K0038_01140	alpha/beta hydrolase fold domain-containing protein		K0038_01140				K0038_01177	hrpL	Belongs to the sigma-70 factor family. ECF subfamily	2.60E-84	318.2	Pseudomonas syringae group		0			K03088		K
	K0038_01141	transketolase		K0038_01141	K00615			K0038_01178	hrpK	Type III secretion system translocator protein, HrpF	0.00E0	1146	Pseudomonas syringae group		0					S
	K0038_01142	hypothetical protein		K0038_01142	K00615			K0038_01179	anK3	response to abiotic stimulus	1.20E-150	539.7	Proteobacteria		0			K07126		S
	K0038_01143	MFS transporter		K0038_01143				K0038_01180		transposition	3.50E-92	345.1	Gammaproteobacteria		0					L
	K0038_01144	3-oxoacyl-(acyl-carrier-protein) reductase, putative		K0038_01144				K0038_01181			2.00E-1	41.6	Bacteria		0
	K0038_01145	transcriptional regulatory protein		K0038_01145				K0038_01182			2.90E-103	382.5	Bacteria		0
	K0038_01146	effector locus protein		K0038_01146	K08994			K0038_01183		DNA integration	1.20E-26	125.2	Bacteria		0					L
	K0038_01147	type III helper protein HrpW1		K0038_01147				K0038_01184	xkdG	capsid protein	4.40E-217	760.4	Gammaproteobacteria		0					S
	K0038_01148	hypothetical protein		K0038_01148				K0038_01185			1.40E-2	45.4	Burkholderiaceae		0
	K0038_01149	type III chaperone protein AvrF		K0038_01149				K0038_01186		Endonuclease	8.00E-72	276.2	Gammaproteobacteria		0			K07451		L
	K0038_01150	AvrE-family type 3 secretion system effector		K0038_01150				K0038_01187			1.20E-4	52	Pseudomonas stutzeri group		0
	K0038_01151	transglycosylase SLT domain-containing protein		K0038_01151	K08307			K0038_01188		Phage integrase family	3.10E-231	807.4	Pseudomonas syringae group		0					L
	K0038_01152	type III transcriptional regulator HrpR		K0038_01152				K0038_01189			4.00E-28	130.6	Pseudomonas aeruginosa group		0
	K0038_01153	AAA domain-containing protein		K0038_01153				K0038_01190		AAA domain	3.10E-259	900.6	Gammaproteobacteria		0			K06919		L
	K0038_01154	type III helper protein HrpA1		K0038_01154				K0038_01191		DNA primase	3.60E-51	207.6	Gammaproteobacteria	EC:3.6.4.12	0			K06919,K17680		L
	K0038_01155	type III secretion protein HrpZ		K0038_01155				K0038_01192			6.10E-12	79	Gammaproteobacteria		0
	K0038_01156	type III secretion protein		K0038_01156				K0038_01194		Prophage CP4-57 regulatory protein (AlpA)	4.20E-27	126.7	Pseudomonas syringae group		0			K07733		L
	K0038_01157	EscJ/YscJ/HrcJ family type III secretion inner membrane ring protein		K0038_01157	K03222			K0038_01196		Belongs to the 'phage' integrase family	2.60E-190	671.4	Pseudomonas syringae group		0					L
	K0038_01158	type III secretion protein		K0038_01158				K0038_01198	queA	Transfers and isomerizes the ribose moiety from AdoMet to the 7-aminomethyl group of 7-deazaguanine (preQ1-tRNA) to give epoxyqueuosine (oQ-tRNA)	2.30E-198	698	Pseudomonas syringae group	EC:2.4.99.17; EC:2.4.2.29	5	P:GO:0009314; P:GO:0002099; P:GO:0008616; F:GO:0051075; C:GO:0005829	P:response to radiation; P:queuosine biosynthetic process; F:S-adenosylmethionine:tRNA ribosyltransferase-isomerase activity; C:cytosol; P:tRNA wobble guanine modification	K00773,K07568		F
	K0038_01159	type III secretion protein		K0038_01159	K03223			K0038_01199	tgt	Catalyzes the base-exchange of a guanine (G) residue with the queuine precursor 7-aminomethyl-7-deazaguanine (PreQ1) at position 34 (anticodon wobble position) in tRNAs with GU(N) anticodons (tRNA-Asp, -Asn, -His and -Tyr). Catalysis occurs through a double-displacement mechanism. The nucleophile active site attacks the C1' of nucleotide 34 to detach the guanine base from the RNA, forming a coval…	4.50E-224	783.5	Pseudomonas syringae group	EC:2.4.2.29	5	P:GO:0002099; F:GO:0008270; F:GO:0008479; P:GO:0008616; C:GO:0005829	P:queuosine biosynthetic process; F:zinc ion binding; F:queuine tRNA-ribosyltransferase activity; C:cytosol; P:tRNA wobble guanine modification	K00773		F
	K0038_01160	type III secretion protein		K0038_01160				K0038_01200	yajC	Preprotein translocase	1.10E-53	215.7	Pseudomonas syringae group		2	C:GO:0031522; C:GO:0005887	C:integral component of plasma membrane; C:cell envelope Sec protein transport complex	K03210	map02024,map03060,map03070	U
	K0038_01161	type III secretion protein HrpG		K0038_01161				K0038_01201	secD	Part of the Sec protein translocase complex. Interacts with the SecYEG preprotein conducting channel. SecDF uses the proton motive force (PMF) to complete protein translocation after the ATP-dependent function of SecA	0.00E0	1163.3	Pseudomonas syringae group		3	P:GO:0015031; C:GO:0005887; P:GO:0015833	C:integral component of plasma membrane; P:peptide transport; P:protein transport	K03072	map03060,map03070	U
	K0038_01162	EscC/YscC/HrcC family type III secretion system outer membrane ring protein		K0038_01162	K03219			K0038_01202	secF	Part of the Sec protein translocase complex. Interacts with the SecYEG preprotein conducting channel. SecDF uses the proton motive force (PMF) to complete protein translocation after the ATP-dependent function of SecA	1.50E-158	565.5	Pseudomonas syringae group		4	P:GO:0015031; C:GO:0005887; P:GO:0015833; C:GO:0005618	C:integral component of plasma membrane; C:cell wall; P:peptide transport; P:protein transport	K03072,K03074,K12257	map02024,map03060,map03070	U
	K0038_01163	type III secretion protein		K0038_01163				K0038_01203	ycfJ	Glycine zipper 2TM domain	1.50E-68	265.8	Pseudomonas syringae group		1	P:GO:1900190	P:regulation of single-species biofilm formation			S
	K0038_01164	negative regulator of hrp expression HrpV		K0038_01164				K0038_01204	suhB	Inositol monophosphatase	4.00E-150	537.3	Pseudomonas syringae group	EC:3.1.3.25	8	F:GO:0000287; P:GO:0046855; F:GO:0008934; P:GO:0006020; F:GO:0031403; P:GO:0007165; F:GO:0047954; C:GO:0005829	F:magnesium ion binding; F:lithium ion binding; F:glycerol-2-phosphatase activity; F:inositol monophosphate 1-phosphatase activity; P:signal transduction; P:inositol metabolic process; P:inositol phosphate dephosphorylation; C:cytosol	K01092	map00521,map00562,map01100,map04070	G
	K0038_01165	EscU/YscU/HrcU family type III secretion system export apparatus switch protein		K0038_01165	K03229			K0038_01205	trmJ	Catalyzes the formation of 2'O-methylated cytidine (Cm32) or 2'O-methylated uridine (Um32) at position 32 in tRNA	5.40E-133	480.3	Pseudomonas syringae group	EC:6.1.1.16; EC:2.1.1.200; EC:3.5.1.19	0			K01883,K02533,K08281,K15396	map00760,map00970,map01100	J
	K0038_01166	type III secretion protein HrcT		K0038_01166	K03228			K0038_01206	cysE	Bacterial transferase hexapeptide (six repeats)	1.10E-141	509.2	Pseudomonas syringae group	EC:2.3.1.30	3	F:GO:0009001; C:GO:0005829; P:GO:0006535	P:cysteine biosynthetic process from serine; F:serine O-acetyltransferase activity; C:cytosol	K00640	map00270,map00920,map01100,map01110,map01120,map01200,map01230,map05111	E
	K0038_01167	type III secretion protein HrcS		K0038_01167	K03227			K0038_01207	iscR	Regulates the transcription of several operons and genes involved in the biogenesis of Fe-S clusters and Fe-S-containing proteins	2.70E-85	321.2	Pseudomonas syringae group	EC:2.8.1.7	4	F:GO:0003700; F:GO:0042802; P:GO:0006355; C:GO:0005829	F:identical protein binding; P:regulation of transcription, DNA-templated; F:DNA-binding transcription factor activity; C:cytosol	K04487,K13643	map00730,map01100,map04122	K
	K0038_01168	Surface presentation of antigens protein SpaP		K0038_01168	K03226			K0038_01208	iscS	Master enzyme that delivers sulfur to a number of partners involved in Fe-S cluster assembly, tRNA modification or cofactor biosynthesis. Catalyzes the removal of elemental sulfur atoms from cysteine to produce alanine. Functions as a sulfur delivery protein for Fe-S cluster synthesis onto IscU, an Fe-S scaffold assembly protein, as well as other S acceptor proteins	8.70E-226	789.3	Pseudomonas syringae group	EC:2.8.1.7	10	F:GO:0030170; F:GO:0031071; P:GO:0018131; F:GO:0004123; F:GO:0097163; P:GO:0031119; P:GO:0016226; F:GO:0009000; F:GO:0008483; C:GO:0005829	P:tRNA pseudouridine synthesis; F:selenocysteine lyase activity; F:cysteine desulfurase activity; F:cystathionine gamma-lyase activity; P:iron-sulfur cluster assembly; F:pyridoxal phosphate binding; F:sulfur carrier activity; F:transaminase activity; P:oxazole or thiazole biosynthetic process; C:cytosol	K04487	map00730,map01100,map04122	H
	K0038_01169	type III secretion system protein		K0038_01169	K03225			K0038_01209	iscU	A scaffold on which IscS assembles Fe-S clusters. It is likely that Fe-S cluster coordination is flexible as the role of this complex is to build and then hand off Fe-S clusters	2.20E-66	258.1	Gammaproteobacteria		9	P:GO:0097428; F:GO:0042802; F:GO:0036455; F:GO:0051537; P:GO:0006879; F:GO:0051539; F:GO:0008198; P:GO:0016226; C:GO:0005829	F:iron-sulfur transferase activity; F:ferrous iron binding; P:protein maturation by iron-sulfur cluster transfer; F:identical protein binding; P:iron-sulfur cluster assembly; P:cellular iron ion homeostasis; F:4 iron, 4 sulfur cluster binding; F:2 iron, 2 sulfur cluster binding; C:cytosol	K04488		C
	K0038_01170	type III secretion system protein		K0038_01170	K03225			K0038_01210	iscA	Is able to transfer iron-sulfur clusters to apo- ferredoxin. Multiple cycles of 2Fe2S cluster formation and transfer are observed, suggesting that IscA acts catalytically. Recruits intracellular free iron so as to provide iron for the assembly of transient iron-sulfur cluster in IscU in the presence of IscS, L-cysteine and the thioredoxin reductase system	9.50E-55	219.2	Pseudomonas syringae group		6	P:GO:0097428; F:GO:0051537; F:GO:0034986; F:GO:0008198; P:GO:0016226; C:GO:0005829	F:ferrous iron binding; P:protein maturation by iron-sulfur cluster transfer; P:iron-sulfur cluster assembly; F:iron chaperone activity; F:2 iron, 2 sulfur cluster binding; C:cytosol	K13628		C
	K0038_01171	type III secretion protein		K0038_01171				K0038_01211	hscB	Co-chaperone involved in the maturation of iron-sulfur cluster-containing proteins. Seems to help targeting proteins to be folded toward HscA	1.20E-88	332.4	Pseudomonas syringae group		3	P:GO:0097428; C:GO:1990230; P:GO:0006457	P:protein maturation by iron-sulfur cluster transfer; C:iron-sulfur cluster transfer complex; P:protein folding	K04082,K05801		O
	K0038_01172	type III secretion protein		K0038_01172				K0038_01212	hscA	Chaperone involved in the maturation of iron-sulfur cluster-containing proteins. Has a low intrinsic ATPase activity which is markedly stimulated by HscB	0.00E0	1157.5	Pseudomonas syringae group		16	F:GO:0005524; P:GO:0051085; F:GO:0044183; P:GO:0034620; F:GO:0051082; C:GO:1990230; P:GO:0009408; P:GO:1903506; F:GO:0051087; F:GO:0016887; P:GO:0097428; F:GO:0008270; F:GO:0016989; P:GO:0065003; F:GO:0043531; P:GO:0070417	F:protein folding chaperone; F:sigma factor antagonist activity; P:chaperone cofactor-dependent protein refolding; F:ADP binding; F:ATP hydrolysis activity; F:unfolded protein binding; F:zinc ion binding; P:response to heat; P:cellular response to cold; P:regulation of nucleic acid-templated transcription; F:chaperone binding; P:protein-containing complex assembly; C:iron-sulfur cluster transfer …	K04043,K04044	map03018,map04212,map05152	O
	K0038_01173	type III secretion cytoplasmic ATPase HrcN		K0038_01173	K03224			K0038_01213	fdx	2Fe-2S iron-sulfur cluster binding domain	6.10E-60	236.5	Pseudomonas syringae group		0			K04755		C
	K0038_01174	type III secretion protein HrpQ		K0038_01174	K03220			K0038_01214	iscX	Iron-sulphur cluster assembly	4.20E-29	133.3	Pseudomonas syringae group		5	P:GO:0043086; F:GO:0008198; F:GO:0004857; P:GO:0016226; C:GO:0005829	F:ferrous iron binding; P:iron-sulfur cluster assembly; P:negative regulation of catalytic activity; F:enzyme inhibitor activity; C:cytosol			S
	K0038_01175	type III secretion component protein HrcV		K0038_01175	K03230			K0038_01215	ndk	Major role in the synthesis of nucleoside triphosphates other than ATP. The ATP gamma phosphate is transferred to the NDP beta phosphate via a ping-pong mechanism, using a phosphorylated active-site intermediate	7.60E-68	263.1	Pseudomonas syringae group	EC:2.7.4.6	6	P:GO:0006165; P:GO:0006220; P:GO:0006163; P:GO:0015949; F:GO:0004550; C:GO:0005829	P:nucleoside diphosphate phosphorylation; P:purine nucleotide metabolic process; P:nucleobase-containing small molecule interconversion; F:nucleoside diphosphate kinase activity; C:cytosol; P:pyrimidine nucleotide metabolic process	K00940	map00230,map00240,map00983,map01100,map01110,map01130,map04016	F
	K0038_01176	hypersensitivity response secretion protein hrpJ		K0038_01176	K04058			K0038_01216	rlmN	Specifically methylates position 2 of adenine 2503 in 23S rRNA and position 2 of adenine 37 in tRNAs	7.70E-216	756.1	Pseudomonas syringae group	EC:2.1.1.192	7	F:GO:0070040; P:GO:0030488; F:GO:0000049; P:GO:0070475; F:GO:0051539; F:GO:0002935; C:GO:0005829	P:tRNA methylation; F:tRNA (adenine-C2-)-methyltransferase activity; F:rRNA (adenine-C2-)-methyltransferase activity; P:rRNA base methylation; F:4 iron, 4 sulfur cluster binding; F:tRNA binding; C:cytosol	K06941		J
	K0038_01177	RNA polymerase sigma factor HrpL		K0038_01177				K0038_01217	pilF	Type IV pilus biogenesis	7.10E-125	453.4	Pseudomonas syringae group		0			K02656		NU
	K0038_01178	type III effector HrpK		K0038_01178				K0038_01218	rodZ	Domain of unknown function (DUF4115)	2.60E-130	471.9	Pseudomonas syringae group		3	C:GO:0005887; P:GO:0051128; P:GO:0008360	C:integral component of plasma membrane; P:regulation of cell shape; P:regulation of cellular component organization	K15539		S
	K0038_01179	membrane-targeted effector domain-containing toxin		K0038_01179				K0038_01219	ispG	Converts 2C-methyl-D-erythritol 2,4-cyclodiphosphate (ME-2,4cPP) into 1-hydroxy-2-methyl-2-(E)-butenyl 4-diphosphate	5.60E-203	713.4	Pseudomonas syringae group	EC:1.17.7.1; EC:1.17.7.3	7	P:GO:0022900; F:GO:0046429; P:GO:0019288; F:GO:0051539; F:GO:0046872; F:GO:0009055; C:GO:0005829	F:4-hydroxy-3-methylbut-2-en-1-yl diphosphate synthase activity; F:metal ion binding; F:electron transfer activity; P:isopentenyl diphosphate biosynthetic process, methylerythritol 4-phosphate pathway; F:4 iron, 4 sulfur cluster binding; C:cytosol; P:electron transport chain	K03526	map00900,map01100,map01110,map01130	I
	K0038_01180	hypothetical protein		K0038_01180				K0038_01220	hisS	Histidyl-tRNA synthetase	3.70E-243	847	Pseudomonas syringae group	EC:6.1.1.21	6	F:GO:0004821; C:GO:0005886; P:GO:0006427; C:GO:0005618; C:GO:0005829; P:GO:0040007	C:cell wall; P:growth; F:histidine-tRNA ligase activity; P:histidyl-tRNA aminoacylation; C:cytosol; C:plasma membrane	K01892	map00970	J
	K0038_01181	hypothetical protein		K0038_01181				K0038_01221	yfgM	Tetratricopeptide repeat-like domain	9.30E-110	402.9	Pseudomonas syringae group		1	C:GO:0071575	C:integral component of external side of plasma membrane			S
	K0038_01182	hypothetical protein		K0038_01182				K0038_01222	bamB	Part of the outer membrane protein assembly complex, which is involved in assembly and insertion of beta-barrel proteins into the outer membrane	4.10E-140	504.6	Pseudomonas syringae group		6	F:GO:0042802; P:GO:0043165; P:GO:0008152; P:GO:0051205; F:GO:0016491; C:GO:1990063	F:identical protein binding; P:Gram-negative-bacterium-type cell outer membrane assembly; P:protein insertion into membrane; P:metabolic process; F:oxidoreductase activity; C:Bam protein complex	K17713		M
	K0038_01183	acetyl-CoA carboxylase carboxyltransferase subunit beta		K0038_01183				K0038_01223	der	GTPase that plays an essential role in the late steps of ribosome biogenesis	2.20E-268	931	Pseudomonas syringae group		9	F:GO:0005525; F:GO:0043023; F:GO:0032794; F:GO:0032550; F:GO:0003924; F:GO:0097216; P:GO:0000027; F:GO:0043022; C:GO:0005829	F:GTPase activating protein binding; F:ribosomal large subunit binding; F:purine ribonucleoside binding; F:guanosine tetraphosphate binding; F:ribosome binding; F:GTP binding; F:GTPase activity; P:ribosomal large subunit assembly; C:cytosol	K03977		S
	K0038_01184	phage major capsid protein		K0038_01184				K0038_01224	ybdL	Aminotransferase	1.30E-218	765.4	Pseudomonas syringae group	EC:2.6.1.88; EC:2.6.1.17	3	F:GO:0030170; F:GO:0010326; C:GO:0005618	F:methionine-oxo-acid transaminase activity; C:cell wall; F:pyridoxal phosphate binding	K14267,K14287	map00300,map01100,map01120,map01230	E
	K0038_01185	DNA-binding protein		K0038_01185				K0038_01225	yafV	carbon-nitrogen family	2.00E-138	498.4	Pseudomonas syringae group	EC:3.5.1.3	0			K13566	map00250	S
	K0038_01186	HNH endonuclease		K0038_01186	K07451			K0038_01226			2.30E-11	75.5	Pseudomonas syringae group		0
	K0038_01187	protein of unknown function		K0038_01187				K0038_01227	bcpA	Catalyzes the decarboxylation of oxaloacetate into pyruvate. Seems to play a role in maintaining cellular concentrations of bicarbonate and pyruvate	1.80E-156	558.5	Pseudomonas syringae group	EC:4.1.1.3	4	P:GO:0006113; P:GO:0017000; P:GO:0006805; F:GO:0008807	F:carboxyvinyl-carboxyphosphonate phosphorylmutase activity; P:fermentation; P:antibiotic biosynthetic process; P:xenobiotic metabolic process	K01003	map00620,map01100	H
	K0038_01188	integrase		K0038_01188				K0038_01228	leuA	Catalyzes the condensation of the acetyl group of acetyl-CoA with 3-methyl-2-oxobutanoate (2-oxoisovalerate) to form 3-carboxy-3-hydroxy-4-methylpentanoate (2-isopropylmalate)	0.00E0	1103.2	Pseudomonas syringae group	EC:2.3.3.13	0			K01649	map00290,map00620,map01100,map01110,map01210,map01230	E
	K0038_01189	putative protein		K0038_01189				K0038_01229		Peptidase, M23 M37 family	4.60E-154	550.4	Pseudomonas syringae group	EC:3.4.24.75	0			K08259		M
	K0038_01190	AAA family ATPase		K0038_01190	K06919			K0038_01230	xseA	Bidirectionally degrades single-stranded DNA into large acid-insoluble oligonucleotides, which are then degraded further into small acid-soluble oligonucleotides	1.60E-183	649	Pseudomonas syringae group	EC:3.1.11.6	0			K03601	map03430	L
	K0038_01191	virulence-associated protein E		K0038_01191				K0038_01231		Sugar ABC transporter ATPase	3.20E-103	380.9	Pseudomonas syringae group		0					S
	K0038_01192	putative protein		K0038_01192				K0038_01232	guaB	Catalyzes the conversion of inosine 5'-phosphate (IMP) to xanthosine 5'-phosphate (XMP), the first committed and rate- limiting step in the de novo synthesis of guanine nucleotides, and therefore plays an important role in the regulation of cell growth	1.90E-251	874.8	Pseudomonas syringae group	EC:1.1.1.205	6	F:GO:0042802; P:GO:0009411; P:GO:0006183; F:GO:0003938; P:GO:1901070; C:GO:0005829	P:GTP biosynthetic process; P:guanosine-containing compound biosynthetic process; F:IMP dehydrogenase activity; F:identical protein binding; P:response to UV; C:cytosol	K00088	map00230,map00983,map01100,map01110	F
	K0038_01194	AlpA family transcriptional regulator		K0038_01194	K07733			K0038_01233	guaA	Catalyzes the synthesis of GMP from XMP	1.70E-309	1067.8	Pseudomonas syringae group	EC:6.3.5.2	7	F:GO:0042802; F:GO:0003921; P:GO:0006177; C:GO:0005618; P:GO:1901070; C:GO:0005829; P:GO:0040007	P:guanosine-containing compound biosynthetic process; C:cell wall; P:growth; F:identical protein binding; P:GMP biosynthetic process; F:GMP synthase activity; C:cytosol	K01951	map00230,map00983,map01100	F
	K0038_01195	Sialic acid utilization regulator, RpiR family		K0038_01195				K0038_01234		Protein of unknown function (DUF4255)	5.20E-40	171	Gammaproteobacteria		0					S
	K0038_01196	integrase arm-type DNA-binding domain-containing protein		K0038_01196				K0038_01235			1.00E-20	107.5	Bacteroidetes		0
	K0038_01198	S-adenosylmethionine:tRNA ribosyltransferase-isomerase		K0038_01198	K07568			K0038_01236		tail sheath protein	3.50E-219	767.7	Gammaproteobacteria		0			K06907		M
	K0038_01199	queuine tRNA-ribosyltransferase (tRNA-guanine transglycosylase) (Guanine insertion enzyme)		K0038_01199	K00773			K0038_01237		phage tail protein	4.50E-74	283.9	Gammaproteobacteria		0					S
	K0038_01200	preprotein translocase		K0038_01200	K03210			K0038_01238		phage tail protein	2.90E-42	178.3	Proteobacteria		0					S
	K0038_01201	protein-export membrane protein SecD		K0038_01201	K03072			K0038_01240		LysM domain	1.60E-72	279.3	Gammaproteobacteria		0					S
	K0038_01202	protein-export membrane protein SecF		K0038_01202	K03074			K0038_01241		protein and some similarities with VgrG protein	3.40E-162	578.6	Gammaproteobacteria		0					S
	K0038_01203	hypothetical protein		K0038_01203				K0038_01242		PAAR motif	2.30E-10	71.6	Flavobacteriia		0					S
	K0038_01204	inositol monophosphatase		K0038_01204	K01092			K0038_01243			3.80E-32	144.4	Bacteria		0			K06903
	K0038_01205	RNA methyltransferase, TrmH family, group 1		K0038_01205	K15396			K0038_01244		protein of Photorhabdus and some similarities with	5.70E-138	499.2	Gammaproteobacteria		0					S
	K0038_01206	serine O-acetyltransferase		K0038_01206	K00640			K0038_01245		Involved in chlorophyll biosynthesis. Catalyzes the insertion of magnesium ion into protoporphyrin IX to yield Mg- protoporphyrin IX	1.30E-98	367.9	Bacteroidetes	EC:6.6.1.1	0			K03404,K03405	map00860,map01100,map01110	H
	K0038_01207	iron-sulfur cluster assembly transcription factor IscR		K0038_01207	K13643			K0038_01246		peptidase	1.00E-147	531.6	Gammaproteobacteria		0					D
	K0038_01208	cysteine desulfurase		K0038_01208	K04487			K0038_01247			3.50E-47	196.4	Bacteria		0
	K0038_01209	scaffold protein		K0038_01209	K04488			K0038_01248			1.00E-31	144.1	Bacteroidetes		0
	K0038_01210	iron-sulfur cluster assembly protein IscA		K0038_01210	K13628			K0038_01249			1.20E-29	137.1	Flavobacterium		0
	K0038_01211	co-chaperone Hsc20		K0038_01211	K04082			K0038_01250		ATPase family associated with various cellular activities (AAA)	8.50E-169	600.1	Vibrionales		0					O
	K0038_01212	chaperone protein HscA		K0038_01212	K04044			K0038_01251		Domain of unknown function (DUF4157)	6.40E-45	188.3	Flavobacterium		0					M
	K0038_01213	ferredoxin, 2Fe-2S		K0038_01213	K04755			K0038_01252			1.10E-94	353.2	Bacteria		0
	K0038_01214	hypothetical protein		K0038_01214				K0038_01253		Protein of unknown function (DUF2726)	0.00E0	1442.2	Pseudomonas syringae group		0					L
	K0038_01215	nucleoside diphosphate kinase		K0038_01215	K00940			K0038_01254		Tetratricopeptide repeat	0.00E0	1081.6	Pseudomonas syringae group		0					S
	K0038_01216	23S rRNA (adenine(2503)-C(2))-methyltransferase RlmN		K0038_01216	K06941			K0038_01255	cumA	Multicopper oxidase	1.00E-270	938.7	Pseudomonas syringae group		0					Q
	K0038_01217	type IV pilus biogenesis protein PilF		K0038_01217	K02656			K0038_01256	tadA	Catalyzes the deamination of adenosine to inosine at the wobble position 34 of tRNA(Arg2)	8.10E-85	319.7	Pseudomonas syringae group	EC:3.5.4.1; EC:3.5.4.33; EC:3.8.1.5; EC:3.5.4.3; EC:3.4.17.13	3	F:GO:0008270; P:GO:0002100; F:GO:0052717	F:tRNA-specific adenosine-34 deaminase activity; F:zinc ion binding; P:tRNA wobble adenosine to inosine editing	K01297,K01485,K01487,K01563,K11991	map00230,map00240,map00330,map00361,map00625,map01100,map01120	F
	K0038_01218	helix-turn-helix domain-containing protein		K0038_01218	K15539			K0038_01257	mltF	Murein-degrading enzyme that degrades murein glycan strands and insoluble, high-molecular weight murein sacculi, with the concomitant formation of a 1,6-anhydromuramoyl product. Lytic transglycosylases (LTs) play an integral role in the metabolism of the peptidoglycan (PG) sacculus. Their lytic action creates space within the PG sacculus to allow for its expansion as well as for the insertion of …	4.20E-272	943.3	Pseudomonas syringae group		3	C:GO:0009279; F:GO:0008933; P:GO:0009253	C:cell outer membrane; P:peptidoglycan catabolic process; F:lytic transglycosylase activity	K18691		M
	K0038_01219	1-hydroxy-2-methyl-2-(E)-butenyl 4-diphosphate synthase		K0038_01219	K03526			K0038_01258	purL	Phosphoribosylformylglycinamidine synthase involved in the purines biosynthetic pathway. Catalyzes the ATP-dependent conversion of formylglycinamide ribonucleotide (FGAR) and glutamine to yield formylglycinamidine ribonucleotide (FGAM) and glutamate	0.00E0	2550	Pseudomonas syringae group	EC:6.3.5.3	7	F:GO:0016887; F:GO:0000287; F:GO:0005524; P:GO:0006541; P:GO:0006189; F:GO:0004642; C:GO:0005829	P:'de novo' IMP biosynthetic process; F:magnesium ion binding; P:glutamine metabolic process; F:phosphoribosylformylglycinamidine synthase activity; F:ATP hydrolysis activity; F:ATP binding; C:cytosol	K01952	map00230,map01100,map01110,map01130	F
	K0038_01220	histidyl-tRNA synthetase		K0038_01220	K01892			K0038_01260	IV02_27405	L,D-transpeptidase catalytic domain	8.20E-102	376.3	Pseudomonas syringae group		0					S
	K0038_01221	hypothetical protein		K0038_01221				K0038_01261	nudC_1	Nudix N-terminal	2.20E-99	368.2	Pseudomonas syringae group		0					F
	K0038_01222	PQQ enzyme repeat domain protein		K0038_01222	K17713			K0038_01262	nudL	NUDIX domain	1.80E-107	395.2	Pseudomonas syringae group		0					L
	K0038_01223	GTP-binding protein Der		K0038_01223	K03977			K0038_01263	yrdA	Bacterial transferase hexapeptide (six repeats)	2.40E-71	275	Pseudomonas syringae group		0					S
	K0038_01224	aminotransferase, classes I and II		K0038_01224	K14287			K0038_01264		Protein of unknown function (DUF1289)	2.20E-28	131	Pseudomonas syringae group		0			K06938		S
	K0038_01225	amidohydrolase		K0038_01225	K13566			K0038_01265	M1-344	preQ0 transporter	2.40E-75	288.1	Pseudomonas syringae group		0			K09125		S
	K0038_01226	Hypothetical protein		K0038_01226				K0038_01266	purT	Involved in the de novo purine biosynthesis. Catalyzes the transfer of formate to 5-phospho-ribosyl-glycinamide (GAR), producing 5-phospho-ribosyl-N-formylglycinamide (FGAR). Formate is provided by PurU via hydrolysis of 10-formyl-tetrahydrofolate	4.40E-214	750.4	Pseudomonas syringae group	EC:2.1.2.2	5	F:GO:0004644; P:GO:0016310; F:GO:0008776; P:GO:0009152; C:GO:0005829	F:phosphoribosylglycinamide formyltransferase activity; P:purine ribonucleotide biosynthetic process; P:phosphorylation; F:acetate kinase activity; C:cytosol	K08289	map00230,map00670,map01100,map01110,map01130	F
	K0038_01227	carboxyphosphonoenolpyruvate phosphonomutase		K0038_01227	K01003			K0038_01267	yhjE	COG0477 Permeases of the major facilitator superfamily	9.40E-234	815.8	Pseudomonas syringae group		0			K02625,K03288,K03761,K03762		EGP
	K0038_01228	2-isopropylmalate synthase		K0038_01228	K01649			K0038_01268	yfjD	Transporter associated domain	6.40E-224	783.1	Pseudomonas syringae group		1	C:GO:0005886	C:plasma membrane	K03699		P
	K0038_01229	peptidase, M23/M37 family		K0038_01229				K0038_01269	ypjD	Cytochrome C assembly protein	9.90E-125	453	Pseudomonas syringae group		1	C:GO:0005886	C:plasma membrane			S
	K0038_01230	Exodeoxyribonuclease 7 large subunit		K0038_01230	K03601			K0038_01270	ffh	Involved in targeting and insertion of nascent membrane proteins into the cytoplasmic membrane. Binds to the hydrophobic signal sequence of the ribosome-nascent chain (RNC) as it emerges from the ribosomes. The SRP-RNC complex is then targeted to the cytoplasmic membrane where it interacts with the SRP receptor FtsY. Interaction with FtsY leads to the transfer of the RNC complex to the Sec transl…	5.40E-216	756.9	Pseudomonas syringae group	EC:3.6.5.4	10	F:GO:0005525; C:GO:0005886; P:GO:0015833; C:GO:0048500; F:GO:0032550; C:GO:0005618; F:GO:0003924; C:GO:0005829; P:GO:0006612; P:GO:0040007	C:cell wall; P:growth; F:purine ribonucleoside binding; P:peptide transport; F:GTP binding; C:signal recognition particle; F:GTPase activity; P:protein targeting to membrane; C:cytosol; C:plasma membrane	K03106	map02024,map03060,map03070	U
	K0038_01231	hypothetical protein		K0038_01231				K0038_01271	rpsP	Ribosomal protein S16	1.80E-40	171.4	Pseudomonas syringae group		9	P:GO:0006412; F:GO:0004520; F:GO:0000400; C:GO:0005886; P:GO:0090305; C:GO:0022627; F:GO:0003735; P:GO:0000028; P:GO:0006259	P:nucleic acid phosphodiester bond hydrolysis; F:structural constituent of ribosome; P:DNA metabolic process; P:ribosomal small subunit assembly; F:endodeoxyribonuclease activity; F:four-way junction DNA binding; P:translation; C:cytosolic small ribosomal subunit; C:plasma membrane	K02959	map03010	J
	K0038_01232	IMP dehydrogenase		K0038_01232	K00088			K0038_01272	rimM	An accessory protein needed during the final step in the assembly of 30S ribosomal subunit, possibly for assembly of the head region. Probably interacts with S19. Essential for efficient processing of 16S rRNA. May be needed both before and after RbfA during the maturation of 16S rRNA. It has affinity for free ribosomal 30S subunits but not for 70S ribosomes	8.90E-98	362.8	Pseudomonas syringae group		4	P:GO:0030490; P:GO:0000028; C:GO:0005829; P:GO:0040007	P:maturation of SSU-rRNA; P:growth; P:ribosomal small subunit assembly; C:cytosol	K02860		J
	K0038_01233	glutamine-hydrolyzing GMP synthase		K0038_01233	K01951			K0038_01273	trmD	Belongs to the RNA methyltransferase TrmD family	2.20E-139	501.5	Pseudomonas syringae group	EC:4.6.1.12; EC:2.1.1.228	7	F:GO:0000287; P:GO:0002939; F:GO:0042802; F:GO:0050518; F:GO:0052906; C:GO:0005829; P:GO:0040007	F:magnesium ion binding; F:2-C-methyl-D-erythritol 4-phosphate cytidylyltransferase activity; P:growth; F:identical protein binding; P:tRNA N1-guanine methylation; F:tRNA (guanine(37)-N(1))-methyltransferase activity; C:cytosol	K00554,K01770	map00900,map01100,map01110,map01130	J
	K0038_01234	hypothetical protein		K0038_01234				K0038_01274	rplS	This protein is located at the 30S-50S ribosomal subunit interface and may play a role in the structure and function of the aminoacyl-tRNA binding site	1.20E-55	222.2	Pseudomonas syringae group		7	P:GO:0006412; C:GO:0022625; C:GO:0005886; F:GO:0070180; F:GO:0003735; P:GO:0000027; P:GO:0040007	F:structural constituent of ribosome; P:growth; C:cytosolic large ribosomal subunit; P:ribosomal large subunit assembly; P:translation; F:large ribosomal subunit rRNA binding; C:plasma membrane	K02884	map03010	J
	K0038_01235	hypothetical protein		K0038_01235				K0038_01275	xerD	Phage integrase, N-terminal SAM-like domain	3.00E-167	594.3	Pseudomonas syringae group		8	P:GO:0009314; P:GO:0071139; P:GO:0015074; P:GO:0006276; C:GO:0005622; F:GO:0009037; F:GO:0000150; C:GO:0048476	F:DNA strand exchange activity; P:response to radiation; C:Holliday junction resolvase complex; P:DNA integration; P:plasmid maintenance; C:intracellular anatomical structure; P:resolution of recombination intermediates; F:tyrosine-based site-specific recombinase activity	K04763		D
	K0038_01236	Phage tail sheath protein FI		K0038_01236				K0038_01277	dsbC	Required for disulfide bond formation in some periplasmic proteins. Acts by transferring its disulfide bond to other proteins and is reduced in the process	2.60E-132	478	Pseudomonas syringae group	EC:5.3.4.1	0			K03981		O
	K0038_01237	phage tail protein		K0038_01237				K0038_01278	hom	Homoserine dehydrogenase	5.30E-237	826.6	Pseudomonas syringae group	EC:1.1.1.3	3	C:GO:0005886; C:GO:0005618; P:GO:0040007	C:cell wall; P:growth; C:plasma membrane	K00003	map00260,map00270,map00300,map01100,map01110,map01120,map01130,map01230	E
	K0038_01238	phage tail protein		K0038_01238				K0038_01279	thrC	Threonine synthase N terminus	7.90E-271	939.1	Pseudomonas syringae group	EC:4.2.3.1	3	P:GO:0016311; F:GO:0004795; P:GO:0009088	F:threonine synthase activity; P:threonine biosynthetic process; P:dephosphorylation	K01733	map00260,map00750,map01100,map01110,map01120,map01230	H
	K0038_01239	hypothetical protein		K0038_01239				K0038_01280		PhoQ Sensor	0.00E0	2104.7	Pseudomonas syringae group	EC:2.7.13.3	0			K07679	map02020,map05133	T
	K0038_01240	putative protein		K0038_01240				K0038_01281		Putative diguanylate phosphodiesterase	3.70E-187	661	Pseudomonas syringae group		0					T
	K0038_01241	type VI secretion system tip protein VgrG		K0038_01241				K0038_01282		DNA-binding response regulator, LuxR family	2.90E-98	364.8	Pseudomonas syringae group		0			K02282,K07687,K07689,K07690	map02020,map02025,map02026,map05111,map05133	K
	K0038_01242	PAAR domain-containing protein		K0038_01242				K0038_01283		Protein of unknown function (DUF3509)	6.10E-40	169.9	Pseudomonas syringae group		0					S
	K0038_01243	GPW/gp25 family protein		K0038_01243				K0038_01284		COG0834 ABC-type amino acid transport signal transduction systems periplasmic component domain	3.30E-134	484.6	Pseudomonas syringae group		0			K09996	map02010	ET
	K0038_01244	baseplate J/gp47 family protein		K0038_01244				K0038_01285	yaeQ	YaeQ	6.60E-101	373.2	Pseudomonas syringae group		0					S
	K0038_01245	diguanylate cyclase		K0038_01245				K0038_01286	recJ	exonuclease RecJ	0.00E0	1115.5	Pseudomonas syringae group		5	P:GO:0006310; P:GO:0010165; P:GO:0006281; P:GO:0090305; F:GO:0045145	P:response to X-ray; P:DNA recombination; P:nucleic acid phosphodiester bond hydrolysis; F:single-stranded DNA 5'-3' exodeoxyribonuclease activity; P:DNA repair	K07462	map03410,map03430,map03440	L
	K0038_01246	putative protein		K0038_01246				K0038_01287	namA	NADH:flavin oxidoreductase / NADH oxidase family	1.80E-209	734.9	Pseudomonas syringae group	EC:1.6.99.1	0			K00354		C
	K0038_01247	hypothetical protein		K0038_01247				K0038_01288		PAS domain	0.00E0	1211.4	Pseudomonas syringae group		0					T
	K0038_01248	hypothetical protein		K0038_01248				K0038_01289	yebE	Protein of unknown function (DUF533)	5.70E-95	354	Pseudomonas syringae group		1	C:GO:0005886	C:plasma membrane			S
	K0038_01249	hypothetical protein		K0038_01249				K0038_01290		C-terminal novel E3 ligase, LRR-interacting	0.00E0	2998.4	Pseudomonas syringae group		0					S
	K0038_01250	ATP-binding protein		K0038_01250				K0038_01291	wspA	chemotaxis protein	6.30E-187	660.6	Pseudomonas syringae group		0			K03406,K13487	map02020,map02025,map02030	NT
	K0038_01251	hypothetical protein		K0038_01251				K0038_01292	wspB	Two component signalling adaptor domain	2.60E-89	334.7	Pseudomonas syringae group		0			K03408,K13488	map02020,map02025,map02030	NT
	K0038_01252	hypothetical protein		K0038_01252				K0038_01293	wspC	Methyltransferase, chemotaxis proteins	7.10E-194	683.3	Pseudomonas syringae group	EC:2.1.1.80	0			K00575,K13486	map02020,map02030	NT
	K0038_01253	RecBCD enzyme subunit RecD		K0038_01253				K0038_01294	wspD	Two component signalling adaptor domain	9.00E-119	433	Pseudomonas syringae group		0			K03408,K13486,K13489	map02020,map02025,map02030	NT
	K0038_01254	tetratricopeptide-like helical domain-containing protein		K0038_01254				K0038_01295	wspE	sensor histidine kinase response regulator	0.00E0	1339.7	Pseudomonas syringae group	EC:2.7.7.65; EC:2.7.13.3	1	F:GO:0019904	F:protein domain specific binding	K03407,K11444,K13490	map02020,map02025,map02030	T
	K0038_01255	multicopper oxidase		K0038_01255				K0038_01296	cheB	catalyzes the demethylation of specific methylglutamate residues introduced into the chemoreceptors (methyl-accepting chemotaxis proteins) by CheR	9.40E-90	336.3	Pseudomonas syringae group	EC:3.5.1.44; EC:3.1.1.61	1	C:GO:0005737	C:cytoplasm	K03412,K03413,K13491	map02020,map02025,map02030	NT
	K0038_01256	tRNA adenosine(34) deaminase TadA		K0038_01256	K11991			K0038_01297	cheB	catalyzes the demethylation of specific methylglutamate residues introduced into the chemoreceptors (methyl-accepting chemotaxis proteins) by CheR	3.90E-72	277.3	Gammaproteobacteria	EC:3.5.1.44; EC:3.1.1.61	1	C:GO:0005737	C:cytoplasm	K03412,K03413,K13491	map02020,map02025,map02030	NT
	K0038_01257	periplasmic binding domain/transglycosylase SLT domain fusion protein		K0038_01257	K18691			K0038_01298	wspR	diguanylate cyclase	8.30E-182	642.9	Pseudomonas syringae group	EC:2.7.7.65	0			K11444	map02020,map02025	T
	K0038_01258	phosphoribosylformylglycinamidine synthase		K0038_01258	K01952			K0038_01299	prfB	Peptide chain release factor 2 directs the termination of translation in response to the peptide chain termination codons UGA and UAA	1.40E-161	575.5	Pseudomonas syringae group		3	F:GO:0016149; P:GO:0006415; C:GO:0005829	F:translation release factor activity, codon specific; P:translational termination; C:cytosol	K02836		J
	K0038_01259	putative protein		K0038_01259				K0038_01300	lysS	Belongs to the class-II aminoacyl-tRNA synthetase family	1.80E-284	984.6	Pseudomonas syringae group	EC:6.1.1.6	11	P:GO:0046677; P:GO:0008654; P:GO:0030322; P:GO:0006430; C:GO:0005886; P:GO:0044419; P:GO:0046471; F:GO:0004824; C:GO:0005618; C:GO:0005829; P:GO:0040007	C:cell wall; P:lysyl-tRNA aminoacylation; P:growth; F:lysine-tRNA ligase activity; P:phospholipid biosynthetic process; P:stabilization of membrane potential; P:response to antibiotic; P:phosphatidylglycerol metabolic process; P:biological process involved in interspecies interaction between organisms; C:cytosol; C:plasma membrane	K04567	map00970	J
	K0038_01260	hypothetical protein		K0038_01260				K0038_01301		Bacterial regulatory proteins, tetR family	2.00E-124	451.8	Pseudomonas syringae group	EC:5.2.1.8	0			K03770		K
	K0038_01261	mutT/nudix family protein		K0038_01261				K0038_01302	IV02_27630	DUF1704	2.20E-240	837.8	Pseudomonas syringae group		0					S
	K0038_01262	mutT/nudix family protein		K0038_01262				K0038_01303	yfhR	X-Pro dipeptidyl-peptidase (S15 family)	4.10E-164	583.9	Pseudomonas syringae group		0			K06889		S
	K0038_01263	bacterial transferase, hexapeptide repeat protein		K0038_01263				K0038_01304			3.50E-49	200.7	Pseudomonas syringae group		0
	K0038_01264	hypothetical protein		K0038_01264	K06938			K0038_01305	ompA2	Belongs to the ompA family	3.90E-110	404.4	Pseudomonas syringae group		0					M
	K0038_01265	membrane protein, putative		K0038_01265				K0038_01306		Domain of unknown function (DUF4398)	2.50E-63	248.1	Proteobacteria		0					S
	K0038_01266	phosphoribosylglycinamide formyltransferase 2		K0038_01266	K08289			K0038_01307	ppc	Forms oxaloacetate, a four-carbon dicarboxylic acid source for the tricarboxylic acid cycle	0.00E0	1669.8	Pseudomonas syringae group	EC:4.1.1.31	6	P:GO:0006101; P:GO:0006099; F:GO:0008964; P:GO:0016999; P:GO:0006805; C:GO:0005829	P:antibiotic metabolic process; P:citrate metabolic process; P:xenobiotic metabolic process; C:cytosol; P:tricarboxylic acid cycle; F:phosphoenolpyruvate carboxylase activity	K01595	map00620,map00680,map00710,map00720,map01100,map01120,map01200	H
	K0038_01267	major facilitator family transporter		K0038_01267				K0038_01308	adk	Catalyzes the reversible transfer of the terminal phosphate group between ATP and AMP. Plays an important role in cellular energy homeostasis and in adenine nucleotide metabolism	1.60E-112	412.1	Pseudomonas syringae group	EC:2.7.4.3	1	C:GO:0005737	C:cytoplasm	K00939	map00230,map00730,map01100,map01110,map01130	F
	K0038_01268	hypothetical protein		K0038_01268				K0038_01309	yeaZ	Inactive homolog of metal-dependent proteases	1.60E-112	412.1	Pseudomonas syringae group	EC:2.3.1.234	6	P:GO:0002949; F:GO:0042802; F:GO:0008237; P:GO:0006508; C:GO:0005618; C:GO:0005829	C:cell wall; F:metallopeptidase activity; F:identical protein binding; P:proteolysis; P:tRNA threonylcarbamoyladenosine modification; C:cytosol	K01409,K14742		O
	K0038_01269	cytochrome C assembly family protein		K0038_01269				K0038_01310			1.20E-46	192.2	Pseudomonas syringae group		0
	K0038_01270	signal recognition particle protein		K0038_01270	K03106			K0038_01311	yecE	Protein of unknown function DUF72	5.40E-161	573.5	Pseudomonas syringae group		0					S
	K0038_01271	ribosomal protein S16		K0038_01271	K02959			K0038_01312		Extensin-like protein C-terminus	1.10E-121	442.6	Pseudomonas syringae group		0					S
	K0038_01272	16S rRNA processing protein RimM		K0038_01272	K02860			K0038_01313			1.70E-100	372.1	Pseudomonas syringae group		0
	K0038_01273	tRNA (guanosine(37)-N1)-methyltransferase TrmD		K0038_01273	K00554			K0038_01314	rsmJ	Specifically methylates the guanosine in position 1516 of 16S rRNA	5.20E-134	483.8	Gammaproteobacteria	EC:2.1.1.242	2	P:GO:0070475; F:GO:0036308	P:rRNA base methylation; F:16S rRNA (guanine(1516)-N(2))-methyltransferase activity	K15984		J
	K0038_01274	ribosomal protein L19		K0038_01274	K02884			K0038_01315		Protein of unknown function (DUF4197)	2.40E-111	408.3	Gammaproteobacteria		0					S
	K0038_01275	XerD protein		K0038_01275	K04763			K0038_01316	ybaY	Type III secretion system lipoprotein chaperone (YscW)	1.70E-49	201.8	Pseudomonas syringae group		0			K09914		S
	K0038_01276	hypothetical protein		K0038_01276				K0038_01317	plsB	Belongs to the GPAT DAPAT family	0.00E0	1605.9	Pseudomonas syringae group	EC:2.3.1.15	4	P:GO:0006631; P:GO:0008654; F:GO:0004366; C:GO:0005887	C:integral component of plasma membrane; P:phospholipid biosynthetic process; F:glycerol-3-phosphate O-acyltransferase activity; P:fatty acid metabolic process	K00631	map00561,map00564,map01100,map01110	I
	K0038_01277	thiol:disulfide interchange protein DsbC		K0038_01277	K03981			K0038_01318			5.20E-68	263.5	Pseudomonas syringae group		0
	K0038_01278	homoserine dehydrogenase		K0038_01278	K00003			K0038_01319		(SAM)-dependent	2.30E-150	538.1	Gammaproteobacteria		0					Q
	K0038_01279	threonine synthase		K0038_01279	K01733			K0038_01320	dapE	Catalyzes the hydrolysis of N-succinyl-L,L- diaminopimelic acid (SDAP), forming succinate and LL-2,6- diaminoheptanedioate (DAP), an intermediate involved in the bacterial biosynthesis of lysine and meso-diaminopimelic acid, an essential component of bacterial cell walls	4.50E-216	756.9	Pseudomonas syringae group	EC:3.5.1.18	7	F:GO:0042802; F:GO:0008270; F:GO:0050897; P:GO:0009089; F:GO:0009014; C:GO:0032153; C:GO:0005829	P:lysine biosynthetic process via diaminopimelate; F:succinyl-diaminopimelate desuccinylase activity; C:cell division site; F:identical protein binding; F:zinc ion binding; F:cobalt ion binding; C:cytosol	K01439	map00300,map01100,map01120,map01230	E
	K0038_01280	Virulence sensor protein BvgS		K0038_01280	K07679			K0038_01321	ygdL	ThiF family	2.70E-149	534.6	Pseudomonas syringae group	EC:2.7.7.73; EC:2.7.7.80	4	F:GO:0030955; F:GO:0031402; F:GO:0061503; P:GO:0061504	P:cyclic threonylcarbamoyladenosine biosynthetic process; F:tRNA threonylcarbamoyladenosine dehydratase; F:potassium ion binding; F:sodium ion binding	K03148,K21029,K22132	map00730,map01100,map04122	H
	K0038_01281	putative signaling protein		K0038_01281				K0038_01322	csdE	Fe-S metabolism associated domain	6.60E-61	240	Pseudomonas syringae group	EC:2.8.1.7; EC:4.4.1.16	2	F:GO:0097163; P:GO:0061504	P:cyclic threonylcarbamoyladenosine biosynthetic process; F:sulfur carrier activity	K02426,K07125,K11717	map00450,map01100	S
	K0038_01282	regulatory protein, LuxR:Response regulator receiver		K0038_01282	K07687			K0038_01323	csdA	Aminotransferase class-V	1.40E-220	771.9	Pseudomonas syringae group	EC:2.8.1.7; EC:4.4.1.16	0			K01766,K11717	map00450,map01100	E
	K0038_01283	hypothetical protein		K0038_01283				K0038_01324	dapD	Catalyzes the conversion of the cyclic tetrahydrodipicolinate (THDP) into the acyclic N-succinyl-L-2- amino-6-oxopimelate using succinyl-CoA	3.70E-185	654.1	Pseudomonas syringae group	EC:2.3.1.117	2	F:GO:0008666; P:GO:0009089	P:lysine biosynthetic process via diaminopimelate; F:2,3,4,5-tetrahydropyridine-2,6-dicarboxylate N-succinyltransferase activity	K00674	map00300,map01100,map01120,map01230	H
	K0038_01284	TIGR02285 family protein		K0038_01284				K0038_01325	yffB	Belongs to the ArsC family	9.10E-60	236.1	Pseudomonas syringae group	EC:1.20.4.1	1	C:GO:0005829	C:cytosol	K00537,K16509		P
	K0038_01285	YaeQ protein family protein		K0038_01285				K0038_01326			3.90E-34	150.2	Pseudomonas syringae group		0
	K0038_01286	ssDNA exonuclease RecJ		K0038_01286	K07462			K0038_01327		Zinc-dependent metalloprotease	5.60E-123	447.2	Pseudomonas syringae group		0					O
	K0038_01287	xenobiotic reductase, putative		K0038_01287				K0038_01328	dapC	Alanine-glyoxylate amino-transferase	6.10E-232	809.7	Pseudomonas syringae group	EC:2.6.1.11; EC:2.6.1.17	0			K00821,K14267	map00220,map00300,map01100,map01110,map01120,map01130,map01210,map01230	E
	K0038_01288	response regulator		K0038_01288				K0038_01329	glnD	Modifies, by uridylylation and deuridylylation, the PII regulatory proteins (GlnB and homologs), in response to the nitrogen status of the cell that GlnD senses through the glutamine level. Under low glutamine levels, catalyzes the conversion of the PII proteins and UTP to PII-UMP and PPi, while under higher glutamine levels, GlnD hydrolyzes PII-UMP to PII and UMP (deuridylylation). Thus, control…	0.00E0	1783.8	Pseudomonas syringae group	EC:2.7.7.59	6	P:GO:0006542; P:GO:0010628; P:GO:0045893; P:GO:0018177; F:GO:0008773; P:GO:0090293	F:[protein-PII] uridylyltransferase activity; P:protein uridylylation; P:nitrogen catabolite regulation of transcription; P:glutamine biosynthetic process; P:positive regulation of transcription, DNA-templated; P:positive regulation of gene expression	K00990	map02020	O
	K0038_01289	hypothetical protein		K0038_01289				K0038_01330	map	Methionine aminopeptidase	1.30E-150	538.9	Pseudomonas syringae group	EC:3.4.11.18	5	P:GO:0006508; F:GO:0070006; F:GO:0008198; P:GO:0070084; C:GO:0005829	P:protein initiator methionine removal; F:ferrous iron binding; P:proteolysis; F:metalloaminopeptidase activity; C:cytosol	K01265		E
	K0038_01290	Leucine-rich repeat (LRR) protein		K0038_01290				K0038_01332	rpsB	Belongs to the universal ribosomal protein uS2 family	2.70E-137	494.6	Pseudomonas syringae group		8	P:GO:0006412; F:GO:0008270; C:GO:0005886; C:GO:0022627; F:GO:0003735; C:GO:0005618; P:GO:0000028; P:GO:0040007	C:cell wall; F:structural constituent of ribosome; P:growth; P:ribosomal small subunit assembly; F:zinc ion binding; P:translation; C:cytosolic small ribosomal subunit; C:plasma membrane	K02967	map03010	J
	K0038_01291	histidine kinase, HAMP region: chemotaxis sensory transducer		K0038_01291	K13487			K0038_01333	tsf	Associates with the EF-Tu.GDP complex and induces the exchange of GDP to GTP. It remains bound to the aminoacyl-tRNA.EF- Tu.GTP complex up to the GTP hydrolysis stage on the ribosome	1.40E-145	522.3	Pseudomonas syringae group		9	C:GO:0009986; F:GO:2001065; F:GO:0008270; P:GO:0065009; F:GO:0003746; F:GO:0051020; F:GO:0005085; C:GO:0005829; P:GO:0006414	F:translation elongation factor activity; C:cell surface; F:guanyl-nucleotide exchange factor activity; P:regulation of molecular function; F:zinc ion binding; P:translational elongation; F:GTPase binding; F:mannan binding; C:cytosol	K02357		J
	K0038_01292	CheW domain protein		K0038_01292	K13488			K0038_01334	pyrH	Catalyzes the reversible phosphorylation of UMP to UDP	6.30E-134	483.4	Pseudomonas syringae group	EC:2.7.4.22	6	P:GO:0016310; F:GO:0042802; P:GO:0046940; P:GO:0006221; F:GO:0033862; C:GO:0005829	P:pyrimidine nucleotide biosynthetic process; P:nucleoside monophosphate phosphorylation; F:identical protein binding; P:phosphorylation; F:UMP kinase activity; C:cytosol	K09903	map00240,map01100	F
	K0038_01293	chemotaxis protein CheR		K0038_01293	K13486			K0038_01335	frr	Responsible for the release of ribosomes from messenger RNA at the termination of protein biosynthesis. May increase the efficiency of translation by recycling ribosomes from one round of translation to another	2.90E-91	341.3	Pseudomonas syringae group		7	C:GO:0005886; P:GO:0002184; F:GO:0043023; F:GO:0008079; C:GO:0005618; C:GO:0005829; P:GO:0040007	C:cell wall; F:ribosomal large subunit binding; P:growth; P:cytoplasmic translational termination; F:translation termination factor activity; C:cytosol; C:plasma membrane	K02838		J
	K0038_01294	CheW domain protein		K0038_01294	K13489			K0038_01336	uppS	Catalyzes the sequential condensation of isopentenyl diphosphate (IPP) with (2E,6E)-farnesyl diphosphate (E,E-FPP) to yield (2Z,6Z,10Z,14Z,18Z,22Z,26Z,30Z,34E,38E)-undecaprenyl diphosphate (di-trans,octa-cis-UPP). UPP is the precursor of glycosyl carrier lipid in the biosynthesis of bacterial cell wall polysaccharide components such as peptidoglycan and lipopolysaccharide	6.10E-137	493.4	Pseudomonas syringae group	EC:2.5.1.31	7	F:GO:0000287; P:GO:0043164; F:GO:0008834; P:GO:0009252; P:GO:0016094; F:GO:0002094; C:GO:0005829	F:magnesium ion binding; P:polyprenol biosynthetic process; F:di-trans,poly-cis-decaprenylcistransferase activity; F:polyprenyltransferase activity; P:Gram-negative-bacterium-type cell wall biogenesis; P:peptidoglycan biosynthetic process; C:cytosol	K00806	map00900,map01110	H
	K0038_01295	hybrid sensor histidine kinase/response regulator		K0038_01295	K13490			K0038_01337	cdsA	Belongs to the CDS family	7.30E-144	516.5	Pseudomonas syringae group	EC:2.7.7.41	5	P:GO:0016024; P:GO:0006221; C:GO:0005886; F:GO:0004605; P:GO:0006655	F:phosphatidate cytidylyltransferase activity; P:pyrimidine nucleotide biosynthetic process; P:CDP-diacylglycerol biosynthetic process; P:phosphatidylglycerol biosynthetic process; C:plasma membrane	K00981	map00564,map01100,map01110,map04070	I
	K0038_01296	chemotaxis-specific protein-glutamate methyltransferase CheB		K0038_01296	K13491			K0038_01338	dxr	Catalyzes the NADP-dependent rearrangement and reduction of 1-deoxy-D-xylulose-5-phosphate (DXP) to 2-C-methyl-D-erythritol 4-phosphate (MEP)	3.80E-213	747.3	Pseudomonas syringae group	EC:1.1.1.267	6	F:GO:0000287; F:GO:0030604; F:GO:0050897; P:GO:0051484; F:GO:0070402; F:GO:0030145	F:NADPH binding; F:magnesium ion binding; P:isopentenyl diphosphate biosynthetic process, methylerythritol 4-phosphate pathway involved in terpenoid biosynthetic process; F:1-deoxy-D-xylulose-5-phosphate reductoisomerase activity; F:cobalt ion binding; F:manganese ion binding	K00099	map00900,map01100,map01110,map01130	I
	K0038_01297	chemotaxis-specific protein-glutamate methyltransferase CheB		K0038_01297				K0038_01339	rseP	Peptidase family M50	2.70E-252	877.5	Pseudomonas syringae group	EC:3.4.21.107	7	F:GO:0043856; F:GO:0045152; P:GO:0010628; F:GO:0004222; C:GO:0005887; P:GO:0045893; P:GO:0006508	C:integral component of plasma membrane; F:anti-sigma factor antagonist activity; F:metalloendopeptidase activity; F:antisigma factor binding; P:proteolysis; P:positive regulation of transcription, DNA-templated; P:positive regulation of gene expression	K04771,K11749	map01503,map02020,map02024,map04112	M
	K0038_01298	PleD family two-component system response regulator		K0038_01298	K11444			K0038_01340	bamA	Part of the outer membrane protein assembly complex, which is involved in assembly and insertion of beta-barrel proteins into the outer membrane	0.00E0	1536.9	Pseudomonas syringae group		3	P:GO:0043165; P:GO:0051205; C:GO:1990063	P:Gram-negative-bacterium-type cell outer membrane assembly; P:protein insertion into membrane; C:Bam protein complex	K07277		M
	K0038_01299	peptide chain release factor 2, programmed frameshift		K0038_01299	K02836			K0038_01341	skp	Outer membrane protein (OmpH-like)	3.20E-81	307.8	Pseudomonas syringae group		10	F:GO:0001530; F:GO:0042802; P:GO:0022417; C:GO:0009279; C:GO:0030288; P:GO:0043165; P:GO:0061077; F:GO:0051082; P:GO:0032978; P:GO:0050821	P:protein stabilization; C:cell outer membrane; F:identical protein binding; P:protein maturation by protein folding; F:unfolded protein binding; P:chaperone-mediated protein folding; F:lipopolysaccharide binding; P:Gram-negative-bacterium-type cell outer membrane assembly; P:protein insertion into membrane from inner side; C:outer membrane-bounded periplasmic space	K06142		M
	K0038_01300	Lysine--tRNA ligase		K0038_01300	K04567			K0038_01342	lpxD	Catalyzes the N-acylation of UDP-3-O-acylglucosamine using 3-hydroxyacyl-ACP as the acyl donor. Is involved in the biosynthesis of lipid A, a phosphorylated glycolipid that anchors the lipopolysaccharide to the outer membrane of the cell	4.30E-120	438	Pseudomonas syringae group	EC:2.3.1.191	4	F:GO:0042802; F:GO:0016410; P:GO:0009245; C:GO:0005829	F:identical protein binding; P:lipid A biosynthetic process; F:N-acyltransferase activity; C:cytosol	K02536	map00540,map01100	M
	K0038_01301	TetR family transcriptional regulator		K0038_01301				K0038_01343	fabZ	Involved in unsaturated fatty acids biosynthesis. Catalyzes the dehydration of short chain beta-hydroxyacyl-ACPs and long chain saturated and unsaturated beta-hydroxyacyl-ACPs	5.80E-79	300.1	Pseudomonas syringae group	EC:4.2.1.59	5	F:GO:0047451; F:GO:0042802; C:GO:0005737; F:GO:0008693; P:GO:0006633	P:fatty acid biosynthetic process; F:identical protein binding; F:3-hydroxydecanoyl-[acyl-carrier-protein] dehydratase activity; F:3-hydroxyoctanoyl-[acyl-carrier-protein] dehydratase activity; C:cytoplasm	K02372	map00061,map00780,map01100,map01212	I
	K0038_01302	hypothetical protein		K0038_01302				K0038_01344	lpxA	involved in the biosynthesis of lipid A, a phosphorylated glycolipid that anchors the lipopolysaccharide to the outer membrane of the cell	1.50E-114	419.1	Gammaproteobacteria	EC:2.3.1.129	4	F:GO:0042802; P:GO:0009245; F:GO:0008780; C:GO:0005829	F:acyl-[acyl-carrier-protein]-UDP-N-acetylglucosamine O-acyltransferase activity; F:identical protein binding; P:lipid A biosynthetic process; C:cytosol	K00677	map00540,map01100,map01503	M
	K0038_01303	lipoprotein, putative		K0038_01303	K06889			K0038_01345	lpxB	Condensation of UDP-2,3-diacylglucosamine and 2,3- diacylglucosamine-1-phosphate to form lipid A disaccharide, a precursor of lipid A, a phosphorylated glycolipid that anchors the lipopolysaccharide to the outer membrane of the cell	6.10E-197	693.3	Pseudomonas syringae group	EC:2.4.1.182	6	F:GO:0008915; C:GO:0019897; F:GO:0005543; P:GO:0009245; F:GO:0043168; C:GO:0005829	F:lipid-A-disaccharide synthase activity; F:anion binding; C:extrinsic component of plasma membrane; F:phospholipid binding; P:lipid A biosynthetic process; C:cytosol	K00748	map00540,map01100	M
	K0038_01304	lipoprotein, putative		K0038_01304				K0038_01346	rnhB	Endonuclease that specifically degrades the RNA of RNA- DNA hybrids	1.10E-110	406	Pseudomonas syringae group	EC:3.1.26.4	7	F:GO:0004523; C:GO:0032299; P:GO:0033567; P:GO:0043137; P:GO:0006298; C:GO:0005622; P:GO:0090502	F:RNA-DNA hybrid ribonuclease activity; P:DNA replication, Okazaki fragment processing; C:intracellular anatomical structure; C:ribonuclease H2 complex; P:mismatch repair; P:DNA replication, removal of RNA primer; P:RNA phosphodiester bond hydrolysis, endonucleolytic	K03470	map03030	L
	K0038_01305	ompA family protein		K0038_01305				K0038_01347	dnaE	DNA polymerase	0.00E0	2314.7	Pseudomonas syringae group	EC:2.7.7.7	5	F:GO:0003887; P:GO:0071897; C:GO:0044776; P:GO:0006260; C:GO:0005829	F:DNA-directed DNA polymerase activity; P:DNA biosynthetic process; P:DNA replication; C:DNA polymerase III, core complex; C:cytosol	K02337	map00230,map00240,map01100,map03030,map03430,map03440	L
	K0038_01306	hypothetical protein		K0038_01306				K0038_01348	accA	Component of the acetyl coenzyme A carboxylase (ACC) complex. First, biotin carboxylase catalyzes the carboxylation of biotin on its carrier protein (BCCP) and then the CO(2) group is transferred by the carboxyltransferase to acetyl-CoA to form malonyl-CoA	2.00E-177	628.2	Pseudomonas syringae group	EC:2.1.3.15; EC:6.4.1.2	5	F:GO:0042802; C:GO:0009329; P:GO:0042759; F:GO:0003989; C:GO:0005829	F:acetyl-CoA carboxylase activity; F:identical protein binding; P:long-chain fatty acid biosynthetic process; C:acetate CoA-transferase complex; C:cytosol	K01962,K01963	map00061,map00620,map00640,map00720,map01100,map01110,map01120,map01130,map01200,map01212	I
	K0038_01307	phosphoenolpyruvate carboxylase		K0038_01307	K01595			K0038_01349	tilS	Ligates lysine onto the cytidine present at position 34 of the AUA codon-specific tRNA(Ile) that contains the anticodon CAU, in an ATP-dependent manner. Cytidine is converted to lysidine, thus changing the amino acid specificity of the tRNA from methionine to isoleucine	1.90E-213	748.4	Pseudomonas syringae group	EC:6.3.4.19	4	F:GO:0042802; F:GO:0032267; P:GO:0002136; C:GO:0005829	F:tRNA(Ile)-lysidine synthase activity; F:identical protein binding; P:tRNA wobble base lysidine biosynthesis; C:cytosol	K04075		D
	K0038_01308	adenylate kinase		K0038_01308	K00939			K0038_01350	pyrG	Catalyzes the ATP-dependent amination of UTP to CTP with either L-glutamine or ammonia as the source of nitrogen. Regulates intracellular CTP levels through interactions with the four ribonucleotide triphosphates	0.00E0	1087.8	Pseudomonas syringae group	EC:6.3.4.2	11	F:GO:0042802; P:GO:0042098; P:GO:0009410; P:GO:0015949; C:GO:0005886; F:GO:0003883; P:GO:0006241; P:GO:0042100; P:GO:0046132; C:GO:0005829; P:GO:0040007	P:response to xenobiotic stimulus; P:B cell proliferation; P:growth; F:identical protein binding; P:pyrimidine ribonucleoside biosynthetic process; P:T cell proliferation; F:CTP synthase activity; P:CTP biosynthetic process; P:nucleobase-containing small molecule interconversion; C:cytosol; C:plasma membrane	K01937	map00240,map01100	F
	K0038_01309	tRNA (adenosine(37)-N6)-threonylcarbamoyltransferase complex dimerization subunit type 1 TsaB		K0038_01309	K14742			K0038_01351	kdsA	Belongs to the KdsA family	1.70E-156	558.5	Pseudomonas syringae group	EC:2.5.1.55	0			K01627	map00540,map01100	M
	K0038_01310	hypothetical protein		K0038_01310				K0038_01352	eno	Catalyzes the reversible conversion of 2- phosphoglycerate into phosphoenolpyruvate. It is essential for the degradation of carbohydrates via glycolysis	4.40E-236	823.5	Pseudomonas syringae group	EC:4.2.1.11	15	F:GO:0000287; F:GO:0004634; P:GO:0034404; P:GO:0009168; P:GO:0009166; C:GO:0000015; P:GO:0006805; P:GO:0006754; P:GO:0042866; C:GO:0009986; F:GO:0042802; P:GO:0019359; C:GO:0005576; P:GO:0006096; C:GO:0005856	F:magnesium ion binding; P:nicotinamide nucleotide biosynthetic process; C:cytoskeleton; P:pyruvate biosynthetic process; F:phosphopyruvate hydratase activity; P:nucleobase-containing small molecule biosynthetic process; C:phosphopyruvate hydratase complex; C:extracellular region; P:nucleotide catabolic process; P:ATP biosynthetic process; C:cell surface; F:identical protein binding; P:glycolytic…	K01689	map00010,map00680,map01100,map01110,map01120,map01130,map01200,map01230,map03018,map04066	F
	K0038_01311	hypothetical protein		K0038_01311				K0038_01353	ftsB	Essential cell division protein. May link together the upstream cell division proteins, which are predominantly cytoplasmic, with the downstream cell division proteins, which are predominantly periplasmic	2.70E-42	177.6	Pseudomonas syringae group		5	F:GO:0042802; C:GO:0005886; C:GO:0030428; C:GO:0032153; P:GO:0043093	C:cell division site; F:identical protein binding; P:FtsZ-dependent cytokinesis; C:cell septum; C:plasma membrane	K05589		D
	K0038_01312	extensin		K0038_01312				K0038_01354	ispD	Catalyzes the formation of 4-diphosphocytidyl-2-C- methyl-D-erythritol from CTP and 2-C-methyl-D-erythritol 4- phosphate (MEP)	5.90E-127	460.3	Pseudomonas syringae group	EC:2.7.7.60	5	F:GO:0000287; F:GO:0042802; P:GO:0008299; F:GO:0050518; C:GO:0005829	F:magnesium ion binding; F:2-C-methyl-D-erythritol 4-phosphate cytidylyltransferase activity; F:identical protein binding; P:isoprenoid biosynthetic process; C:cytosol	K00991	map00900,map01100,map01110,map01130	I
	K0038_01313	energy transducer TonB		K0038_01313				K0038_01355	IV02_27905	Transcriptional regulator	6.10E-168	596.7	Pseudomonas syringae group		0					K
	K0038_01314	SAM-dependent methyltransferase		K0038_01314	K15984			K0038_01356	adhC	Alcohol dehydrogenase GroES-like domain	3.00E-209	734.2	Pseudomonas syringae group	EC:1.1.1.284; EC:1.1.1.1	0			K00121	map00010,map00071,map00350,map00625,map00626,map00680,map00830,map00980,map00982,map01100,map01110,map01120,map01130,map01200,map01220,map05204	C
	K0038_01315	hypothetical protein		K0038_01315				K0038_01357	fghA	Serine hydrolase involved in the detoxification of formaldehyde	4.00E-161	573.9	Pseudomonas syringae group	EC:3.1.2.12	0			K01070,K09795	map00680,map01120,map01200	S
	K0038_01316	putative lipoprotein YbaY		K0038_01316	K09914			K0038_01358	ispF	Involved in the biosynthesis of isopentenyl diphosphate (IPP) and dimethylallyl diphosphate (DMAPP), two major building blocks of isoprenoid compounds. Catalyzes the conversion of 4- diphosphocytidyl-2-C-methyl-D-erythritol 2-phosphate (CDP-ME2P) to 2-C-methyl-D-erythritol 2,4-cyclodiphosphate (ME-CPP) with a corresponding release of cytidine 5-monophosphate (CMP)	1.30E-81	308.9	Pseudomonas syringae group	EC:4.6.1.12; EC:2.7.7.60; EC:2.1.1.228	5	F:GO:0042802; F:GO:0008270; F:GO:0030145; F:GO:0008685; P:GO:0006744	F:identical protein binding; P:ubiquinone biosynthetic process; F:zinc ion binding; F:2-C-methyl-D-erythritol 2,4-cyclodiphosphate synthase activity; F:manganese ion binding	K00554,K00991,K01770,K12506	map00900,map01100,map01110,map01130	F
	K0038_01317	glycerol-3-phosphate acyltransferase		K0038_01317	K00631			K0038_01359	truD	Responsible for synthesis of pseudouridine from uracil- 13 in transfer RNAs	6.10E-191	673.3	Pseudomonas syringae group	EC:5.4.99.27	3	P:GO:0001522; F:GO:0009982; C:GO:0005829	F:pseudouridine synthase activity; P:pseudouridine synthesis; C:cytosol	K06176		J
	K0038_01318	hypothetical protein		K0038_01318				K0038_01360	surE	Nucleotidase that shows phosphatase activity on nucleoside 5'-monophosphates	1.00E-139	502.7	Pseudomonas syringae group	EC:3.1.3.5	9	P:GO:0034404; F:GO:0042802; P:GO:0016311; P:GO:0046133; F:GO:0030145; F:GO:0008253; F:GO:0008254; F:GO:0004309; P:GO:0046050	P:pyrimidine ribonucleoside catabolic process; F:identical protein binding; P:UMP catabolic process; P:nucleobase-containing small molecule biosynthetic process; P:dephosphorylation; F:5'-nucleotidase activity; F:3'-nucleotidase activity; F:exopolyphosphatase activity; F:manganese ion binding	K03787	map00230,map00240,map00760,map01100,map01110	F
	K0038_01319	rRNA large subunit methyltransferase A, putative		K0038_01319	K00563			K0038_01361	pcm	Catalyzes the methyl esterification of L-isoaspartyl residues in peptides and proteins that result from spontaneous decomposition of normal L-aspartyl and L-asparaginyl residues. It plays a role in the repair and or degradation of damaged proteins	1.60E-120	438.7	Pseudomonas syringae group	EC:2.1.1.77	4	F:GO:0004719; C:GO:0005737; P:GO:0030091; P:GO:0006479	P:protein repair; F:protein-L-isoaspartate (D-aspartate) O-methyltransferase activity; C:cytoplasm; P:protein methylation	K00573		J
	K0038_01320	succinyldiaminopimelate desuccinylase		K0038_01320	K01439			K0038_01362	nlpD	Peptidase family M23	7.50E-139	500	Pseudomonas syringae group		6	C:GO:0009279; P:GO:0009410; P:GO:0001896; P:GO:0051345; C:GO:0032153; P:GO:0000920	P:response to xenobiotic stimulus; C:cell outer membrane; C:cell division site; P:positive regulation of hydrolase activity; P:autolysis; P:septum digestion after cytokinesis	K06194,K12943		DM
	K0038_01321	ThiF family protein		K0038_01321	K22132			K0038_01363	rpoS	Sigma-70 region 3	9.30E-181	639.4	Pseudomonas syringae group		5	F:GO:0016987; F:GO:0001000; P:GO:0043254; P:GO:2000142; C:GO:0005737	F:bacterial-type RNA polymerase core enzyme binding; C:cytoplasm; P:regulation of DNA-templated transcription, initiation; P:regulation of protein-containing complex assembly; F:sigma factor activity	K03087	map02026,map05111	K
	K0038_01322	sufE protein		K0038_01322	K02426			K0038_01365	fdxA	Ferredoxins are iron-sulfur proteins that transfer electrons in a wide variety of metabolic reactions	1.70E-59	235	Pseudomonas syringae group		0			K05524		C
	K0038_01323	cysteine sulfinate desulfinase		K0038_01323	K01766			K0038_01366	mutS	that it carries out the mismatch recognition step. This protein has a weak ATPase activity	0.00E0	1643.2	Pseudomonas syringae group		12	F:GO:0016887; C:GO:0032300; F:GO:0005524; F:GO:0042802; F:GO:0008094; P:GO:0006298; F:GO:0003684; F:GO:0008301; F:GO:0032136; F:GO:0043531; P:GO:0000018; C:GO:0005829	F:ATP-dependent activity, acting on DNA; C:mismatch repair complex; P:regulation of DNA recombination; F:damaged DNA binding; F:ADP binding; F:identical protein binding; F:ATP hydrolysis activity; F:DNA binding, bending; F:ATP binding; F:adenine/cytosine mispair binding; P:mismatch repair; C:cytosol	K03555	map03430	L
	K0038_01324	tetrahydrodipicolinate succinylase, putative		K0038_01324	K00674			K0038_01368	ygaD	Belongs to the CinA family	1.80E-76	292	Pseudomonas syringae group	EC:3.5.1.42	1	F:GO:0019159	F:nicotinamide-nucleotide amidase activity	K03742,K03743	map00760	S
	K0038_01325	arsenate reductase		K0038_01325	K00537			K0038_01369	recA	Can catalyze the hydrolysis of ATP in the presence of single-stranded DNA, the ATP-dependent uptake of single-stranded DNA by duplex DNA, and the ATP-dependent hybridization of homologous single-stranded DNAs. It interacts with LexA causing its activation and leading to its autocatalytic cleavage	2.70E-194	684.5	Pseudomonas syringae group		2	P:GO:0009432; C:GO:0005829	P:SOS response; C:cytosol	K03553	map03440	L
	K0038_01326	Hypothetical protein		K0038_01326				K0038_01370	recX	Modulates RecA activity	1.00E-72	279.3	Pseudomonas syringae group		3	P:GO:0050790; F:GO:0030234; P:GO:0006282	P:regulation of DNA repair; F:enzyme regulator activity; P:regulation of catalytic activity	K03565		S
	K0038_01327	matrixin family metalloprotease		K0038_01327				K0038_01371	fas6	Possible lysine decarboxylase	9.40E-203	712.6	Pseudomonas syringae group	EC:3.2.2.10	0			K06966	map00230,map00240	S
	K0038_01328	succinyldiaminopimelate transaminase		K0038_01328	K14267			K0038_01372	IV02_27980	Putative quorum-sensing-regulated virulence factor	1.30E-67	262.3	Pseudomonas syringae group		0					S
	K0038_01329	[protein-PII] uridylyltransferase		K0038_01329	K00990			K0038_01373	yfiP	DTW	2.20E-128	464.9	Pseudomonas syringae group		0			K05812		S
	K0038_01330	methionine aminopeptidase, type I		K0038_01330	K01265			K0038_01374	tcsR	response regulator	2.20E-111	408.3	Pseudomonas syringae group		0					K
	K0038_01332	ribosomal protein S2		K0038_01332	K02967			K0038_01375	dgkA	Recycling of diacylglycerol produced during the turnover of membrane phospholipid	1.70E-55	221.9	Pseudomonas syringae group	EC:2.7.1.107	0			K00901	map00561,map00564,map01100,map01110,map04070,map04072,map05231	M
	K0038_01333	translation elongation factor Ts		K0038_01333	K02357			K0038_01376	yeiE	Transcriptional regulator	3.70E-168	597.4	Pseudomonas syringae group		0					K
	K0038_01334	UMP kinase		K0038_01334	K09903			K0038_01377	fpr	Ferredoxin-NADP reductase	5.30E-152	543.5	Pseudomonas fluorescens group	EC:1.18.1.2; EC:1.19.1.1	0			K00528,K05784	map00362,map00364,map00622,map01100,map01120,map01220	C
	K0038_01335	ribosome recycling factor		K0038_01335	K02838			K0038_01378	tsaA	Uncharacterised protein family UPF0066	9.60E-127	459.5	Pseudomonas syringae group		0					S
	K0038_01336	undecaprenyl diphosphate synthase		K0038_01336	K00806			K0038_01379	yehS	Protein of unknown function (DUF1456)	8.50E-81	306.2	Pseudomonas syringae group		0					S
	K0038_01337	phosphatidate cytidylyltransferase		K0038_01337	K00981			K0038_01380	rluB	Belongs to the pseudouridine synthase RsuA family	5.20E-128	463.8	Pseudomonas syringae group	EC:5.4.99.22; EC:5.4.99.21	0			K06178,K06182		J
	K0038_01338	1-deoxy-D-xylulose 5-phosphate reductoisomerase		K0038_01338	K00099			K0038_01381	yjaB	Acetyltransferase	3.10E-72	277.7	Pseudomonas syringae group		0			K03827		K
	K0038_01339	membrane-associated zinc metalloprotease, putative		K0038_01339	K11749			K0038_01382	rimO	Catalyzes the methylthiolation of an aspartic acid residue of ribosomal protein S12	7.60E-263	912.5	Pseudomonas syringae group	EC:2.8.4.4	0			K14441		J
	K0038_01340	outer membrane protein assembly factor BamA		K0038_01340	K07277			K0038_01383		transcriptional regulator	5.40E-41	173.3	Gammaproteobacteria		0			K07726		K
	K0038_01341	putative outer membrane protein		K0038_01341	K06142			K0038_01384		Cytotoxic translational repressor of toxin-antitoxin stability system	5.30E-42	176.8	Pseudomonas putida group		0					S
	K0038_01342	UDP-3-O-[3-hydroxymyristoyl] glucosamine N-acyltransferase		K0038_01342	K02536			K0038_01386	kup	Transport of potassium into the cell	0.00E0	1203.7	Pseudomonas syringae group		3	C:GO:0016020; F:GO:0015079; P:GO:0071805	F:potassium ion transmembrane transporter activity; C:membrane; P:potassium ion transmembrane transport	K03549		P
	K0038_01343	beta-hydroxyacyl-(acyl-carrier-protein) dehydratase FabZ		K0038_01343	K02372			K0038_01387		Bacterial virulence protein (VirJ)	6.40E-254	882.9	Pseudomonas syringae group		0					U
	K0038_01344	acyl-[acyl-carrier-protein]--UDP-N- acetylglucosamine O-acyltransferase		K0038_01344	K00677			K0038_01388	mprF	membrane	0.00E0	1638.2	Pseudomonas syringae group	EC:2.3.2.3	1	C:GO:0005886	C:plasma membrane	K07027,K14205	map01503,map02020,map05150	S
	K0038_01345	lipid A disaccharide synthase		K0038_01345	K00748			K0038_01391	dinB	Poorly processive, error-prone DNA polymerase involved in untargeted mutagenesis. Copies undamaged DNA at stalled replication forks, which arise in vivo from mismatched or misaligned primer ends. These misaligned primers can be extended by PolIV. Exhibits no 3'-5' exonuclease (proofreading) activity. May be involved in translesional synthesis, in conjunction with the beta clamp from PolIII	2.20E-196	691.4	Pseudomonas syringae group	EC:2.7.7.7	5	F:GO:0003887; P:GO:0071897; P:GO:0009432; P:GO:0006260; P:GO:0006281	F:DNA-directed DNA polymerase activity; P:DNA biosynthetic process; P:SOS response; P:DNA replication; P:DNA repair	K02346		L
	K0038_01346	Ribonuclease HII (RNase HII)		K0038_01346	K03470			K0038_01392			3.60E-174	617.5	Pseudomonas syringae group		0
	K0038_01347	DNA polymerase III subunit alpha		K0038_01347	K02337			K0038_01393	proS	Catalyzes the attachment of proline to tRNA(Pro) in a two-step reaction proline is first activated by ATP to form Pro- AMP and then transferred to the acceptor end of tRNA(Pro). As ProRS can inadvertently accommodate and process non-cognate amino acids such as alanine and cysteine, to avoid such errors it has two additional distinct editing activities against alanine. One activity is designated a…	0.00E0	1113.6	Pseudomonas syringae group	EC:6.1.1.15	5	P:GO:0006433; P:GO:0106074; F:GO:0004827; F:GO:0043906; C:GO:0005829	P:prolyl-tRNA aminoacylation; F:Ala-tRNA(Pro) hydrolase activity; F:proline-tRNA ligase activity; P:aminoacyl-tRNA metabolism involved in translational fidelity; C:cytosol	K01881	map00970	J
	K0038_01348	acetyl-CoA carboxylase, carboxyl transferase, alpha subunit		K0038_01348	K01962			K0038_01394	oprD	outer membrane porin, OprD family	4.60E-236	823.5	Pseudomonas syringae group		0			K18093	map01501,map02020	S
	K0038_01349	tRNA lysidine(34) synthetase TilS		K0038_01349	K04075			K0038_01395	MA20_21960	HIT domain	1.50E-71	275.4	Pseudomonas syringae group		0					FG
	K0038_01350	CTP synthetase		K0038_01350	K01937			K0038_01396	slyX	SlyX	1.40E-27	128.3	Pseudomonas syringae group		0			K03745		S
	K0038_01351	2-dehydro-3-deoxyphosphooctonate aldolase		K0038_01351	K01627			K0038_01397	cspC	Cold shock	1.60E-103	382.1	Pseudomonas syringae group		0			K03704		K
	K0038_01352	enolase		K0038_01352	K01689			K0038_01398	dps	Belongs to the Dps family	8.70E-81	306.2	Pseudomonas syringae group		0			K04047		P
	K0038_01353	Cell division protein FtsB		K0038_01353	K05589			K0038_01399		Ribbon-helix-helix domain	1.50E-39	168.3	Pseudomonas syringae group		0					S
	K0038_01354	2-C-methyl-D-erythritol 4-phosphate cytidylyltransferase		K0038_01354	K00991			K0038_01400	aspS	Aspartyl-tRNA synthetase with relaxed tRNA specificity since it is able to aspartylate not only its cognate tRNA(Asp) but also tRNA(Asn). Reaction proceeds in two steps L-aspartate is first activated by ATP to form Asp-AMP and then transferred to the acceptor end of tRNA(Asp Asn)	0.00E0	1181.8	Pseudomonas syringae group	EC:6.1.1.12	3	P:GO:0006422; F:GO:0004815; C:GO:0005829	F:aspartate-tRNA ligase activity; P:aspartyl-tRNA aminoacylation; C:cytosol	K01876	map00970	J
	K0038_01355	transcriptional regulator, LysR family		K0038_01355				K0038_01401	yebC	Transcriptional regulatory protein	3.40E-132	477.6	Pseudomonas syringae group		2	P:GO:0010212; C:GO:0005829	P:response to ionizing radiation; C:cytosol			K
	K0038_01356	D-isomer specific 2-hydroxyacid dehydrogenase family protein		K0038_01356	K00121			K0038_01402	ruvC	Nuclease that resolves Holliday junction intermediates in genetic recombination. Cleaves the cruciform structure in supercoiled DNA by nicking to strands with the same polarity at sites symmetrically opposed at the junction in the homologous arms and leaves a 5'-terminal phosphate and a 3'-terminal hydroxyl group	1.70E-89	335.5	Pseudomonas syringae group	EC:3.1.22.4	7	P:GO:0071932; P:GO:0000725; P:GO:0009314; C:GO:0005622; F:GO:0008821; P:GO:0090305; C:GO:0048476	P:response to radiation; C:Holliday junction resolvase complex; P:recombinational repair; P:nucleic acid phosphodiester bond hydrolysis; C:intracellular anatomical structure; P:replication fork reversal; F:crossover junction endodeoxyribonuclease activity	K01159	map03440	L
	K0038_01357	esterase, putative		K0038_01357	K01070			K0038_01403	ruvA	The RuvA-RuvB complex in the presence of ATP renatures cruciform structure in supercoiled DNA with palindromic sequence, indicating that it may promote strand exchange reactions in homologous recombination. RuvAB is a helicase that mediates the Holliday junction migration by localized denaturation and reannealing. RuvA stimulates, in the presence of DNA, the weak ATPase activity of RuvB	8.50E-105	386.3	Pseudomonas syringae group	EC:3.6.4.12	12	F:GO:0042802; P:GO:0009314; P:GO:0000724; C:GO:0009379; P:GO:0051289; P:GO:0009432; F:GO:0000400; C:GO:0005886; P:GO:0032508; F:GO:0017111; F:GO:0009378; C:GO:0048476	P:response to radiation; C:Holliday junction helicase complex; C:Holliday junction resolvase complex; P:double-strand break repair via homologous recombination; F:identical protein binding; F:four-way junction DNA binding; P:SOS response; P:protein homotetramerization; P:DNA duplex unwinding; F:four-way junction helicase activity; F:nucleoside-triphosphatase activity; C:plasma membrane	K03550	map03440	L
	K0038_01358	2C-methyl-D-erythritol 2,4-cyclodiphosphate		K0038_01358	K01770			K0038_01404	ruvB	The RuvA-RuvB complex in the presence of ATP renatures cruciform structure in supercoiled DNA with palindromic sequence, indicating that it may promote strand exchange reactions in homologous recombination. RuvAB is a helicase that mediates the Holliday junction migration by localized denaturation and reannealing	9.10E-195	686	Pseudomonas syringae group	EC:3.6.4.12	8	F:GO:0016887; P:GO:0000725; P:GO:0009411; P:GO:0009432; P:GO:0032508; F:GO:0009378; C:GO:0048476; C:GO:0005829	C:Holliday junction resolvase complex; P:recombinational repair; F:ATP hydrolysis activity; P:response to UV; P:SOS response; P:DNA duplex unwinding; F:four-way junction helicase activity; C:cytosol	K03551	map03440	L
	K0038_01359	hypothetical protein		K0038_01359	K06176			K0038_01405	ybgC	Thioesterase	1.20E-79	302.4	Gammaproteobacteria	EC:3.1.2.23	0			K01075,K07107	map00130,map00362,map01100,map01110,map01120	S
	K0038_01360	5'-nucleotidase SurE		K0038_01360	K03787			K0038_01406	tolQ	MotA/TolQ/ExbB proton channel family	2.40E-119	434.9	Pseudomonas syringae group		7	P:GO:0043213; P:GO:0017038; P:GO:0009410; C:GO:0030313; P:GO:0042908; C:GO:0005887; C:GO:0032153	C:integral component of plasma membrane; P:response to xenobiotic stimulus; C:cell envelope; C:cell division site; P:protein import; P:xenobiotic transport; P:bacteriocin transport	K03562	map01120	U
	K0038_01361	protein-L-isoaspartate O-methyltransferase		K0038_01361	K00573			K0038_01407	tolR	TolR protein	2.60E-77	294.7	Pseudomonas syringae group		0			K03560		U
	K0038_01362	lipoprotein NlpD, putative		K0038_01362	K06194			K0038_01408	tolA	TonB C terminal	6.10E-85	321.2	Pseudomonas syringae group		11	F:GO:0046790; P:GO:0043213; P:GO:0071237; P:GO:0017038; P:GO:0009410; P:GO:0042908; C:GO:0005887; F:GO:0097718; P:GO:0046718; P:GO:0051301; C:GO:0032153	C:integral component of plasma membrane; P:response to xenobiotic stimulus; P:viral entry into host cell; C:cell division site; P:cell division; P:protein import; P:cellular response to bacteriocin; F:disordered domain specific binding; P:xenobiotic transport; F:virion binding; P:bacteriocin transport	K03646,K03832		M
	K0038_01363	RNA polymerase sigma factor RpoS		K0038_01363	K03087			K0038_01409	tolB	Involved in the TonB-independent uptake of proteins	1.30E-174	619.4	Pseudomonas syringae group		13	P:GO:1901998; P:GO:0009410; P:GO:0042908; P:GO:0055085; P:GO:0043213; F:GO:0019904; P:GO:0071237; C:GO:0030288; P:GO:0017038; F:GO:0019534; F:GO:0044877; C:GO:0032153; C:GO:0032991	P:response to xenobiotic stimulus; F:protein domain specific binding; P:protein import; P:cellular response to bacteriocin; P:bacteriocin transport; C:outer membrane-bounded periplasmic space; F:toxin transmembrane transporter activity; F:protein-containing complex binding; C:cell division site; P:toxin transport; C:protein-containing complex; P:xenobiotic transport; P:transmembrane transport	K03641		U
	K0038_01365	ferredoxin		K0038_01365	K05524			K0038_01410	pal	Belongs to the ompA family	1.20E-80	305.8	Pseudomonas syringae group		3	C:GO:0031246; P:GO:0051301; C:GO:0032153	C:cell division site; P:cell division; C:intrinsic component of periplasmic side of cell outer membrane	K03640		M
	K0038_01366	DNA mismatch repair protein MutS		K0038_01366	K03555			K0038_01411	cpoB	Mediates coordination of peptidoglycan synthesis and outer membrane constriction during cell division	4.60E-92	344.4	Pseudomonas syringae group	EC:3.5.1.28	0			K01448	map01503	D
	K0038_01367	Competence/damage-inducible protein CinA domain protein		K0038_01367				K0038_01412	queE	Catalyzes the complex heterocyclic radical-mediated conversion of 6-carboxy-5,6,7,8-tetrahydropterin (CPH4) to 7- carboxy-7-deazaguanine (CDG), a step common to the biosynthetic pathways of all 7-deazapurine-containing compounds	1.20E-120	439.1	Pseudomonas syringae group	EC:4.3.99.3; EC:1.97.1.4	0			K04068,K10026	map00790,map01100	H
	K0038_01368	damage-inducible protein CinA		K0038_01368	K03743			K0038_01413	queC	Catalyzes the ATP-dependent conversion of 7-carboxy-7- deazaguanine (CDG) to 7-cyano-7-deazaguanine (preQ(0))	3.90E-122	444.1	Pseudomonas syringae group	EC:6.3.4.20	0			K06920	map00790,map01100	F
	K0038_01369	recombinase RecA		K0038_01369	K03553			K0038_01415	nadA	Catalyzes the condensation of iminoaspartate with dihydroxyacetone phosphate to form quinolinate	5.70E-197	693.3	Pseudomonas syringae group	EC:2.5.1.72	8	F:GO:0008987; P:GO:0019674; P:GO:0019805; P:GO:0006805; F:GO:0051539; P:GO:0034628; P:GO:0006734; C:GO:0005829	F:quinolinate synthetase A activity; P:quinolinate biosynthetic process; P:NADH metabolic process; P:'de novo' NAD biosynthetic process from aspartate; F:4 iron, 4 sulfur cluster binding; P:xenobiotic metabolic process; P:NAD metabolic process; C:cytosol	K03517	map00760,map01100	H
	K0038_01370	recombination regulator RecX		K0038_01370	K03565			K0038_01416	bepA	Functions as both a chaperone and a metalloprotease. Maintains the integrity of the outer membrane by promoting either the assembly or the elimination of outer membrane proteins, depending on their folding state	2.00E-221	775	Pseudomonas syringae group		8	C:GO:0016020; C:GO:0030288; F:GO:0003756; P:GO:0043165; P:GO:0061077; F:GO:0004222; F:GO:0046872; P:GO:0051603	P:proteolysis involved in cellular protein catabolic process; C:membrane; F:metal ion binding; F:metalloendopeptidase activity; F:protein disulfide isomerase activity; P:chaperone-mediated protein folding; P:Gram-negative-bacterium-type cell outer membrane assembly; C:outer membrane-bounded periplasmic space			S
	K0038_01371	decarboxylase family protein		K0038_01371				K0038_01417		Belongs to the sulfur carrier protein TusA family	1.50E-36	158.3	Pseudomonas syringae group		0			K04085	map04122	O
	K0038_01372	hypothetical protein		K0038_01372				K0038_01418	perM	AI-2E family transporter	3.60E-167	594.3	Pseudomonas syringae group		3	F:GO:0005215; C:GO:0005887; P:GO:0055085	C:integral component of plasma membrane; F:transporter activity; P:transmembrane transport	K03548		S
	K0038_01373	hypothetical protein		K0038_01373	K05812			K0038_01419	bcp	Bacterial protein of unknown function (DUF899)	9.30E-83	312.8	Pseudomonas syringae group	EC:1.11.1.15	6	P:GO:0098869; P:GO:0034599; P:GO:0045454; C:GO:0005634; P:GO:0008152; F:GO:0008379	F:thioredoxin peroxidase activity; P:cellular response to oxidative stress; P:cell redox homeostasis; C:nucleus; P:metabolic process; P:cellular oxidant detoxification	K03564		O
	K0038_01374	DNA-binding response regulator, LuxR family		K0038_01374				K0038_01420	gcvR	glycine cleavage system	7.40E-103	379.8	Gammaproteobacteria		2	P:GO:0006351; C:GO:0005829	P:transcription, DNA-templated; C:cytosol	K03567	map02026	E
	K0038_01375	diacylglycerol kinase		K0038_01375	K00901			K0038_01421	dapA	Catalyzes the condensation of (S)-aspartate-beta- semialdehyde (S)-ASA and pyruvate to 4-hydroxy- tetrahydrodipicolinate (HTPA)	1.70E-159	568.5	Pseudomonas syringae group	EC:4.3.3.7; EC:2.5.1.72	5	F:GO:0042802; P:GO:0009089; F:GO:0008840; P:GO:0019877; C:GO:0005829	F:4-hydroxy-tetrahydrodipicolinate synthase activity; P:lysine biosynthetic process via diaminopimelate; F:identical protein binding; P:diaminopimelate biosynthetic process; C:cytosol	K01714,K03517	map00261,map00300,map00760,map01100,map01110,map01120,map01130,map01230	E
	K0038_01376	LysR family transcriptional regulator		K0038_01376				K0038_01422	bamC	NlpB/DapX lipoprotein	9.20E-206	722.6	Pseudomonas syringae group		4	C:GO:0009986; F:GO:0042802; P:GO:0043165; C:GO:1990063	C:cell surface; F:identical protein binding; P:Gram-negative-bacterium-type cell outer membrane assembly; C:Bam protein complex	K07287		M
	K0038_01377	oxidoreductase FAD/NAD(P)-binding subunit		K0038_01377	K00528			K0038_01423	yycJ	Metallo-beta-lactamase superfamily	3.20E-141	507.7	Pseudomonas syringae group		0					S
	K0038_01378	tRNA (adenine(37)-N6)-methyltransferase		K0038_01378	K22900			K0038_01424	purC	Belongs to the SAICAR synthetase family	1.60E-131	475.3	Pseudomonas syringae group	EC:4.3.2.2; EC:6.3.2.6; EC:4.1.1.21	2	F:GO:0004639; C:GO:0005829	F:phosphoribosylaminoimidazolesuccinocarboxamide synthase activity; C:cytosol	K01587,K01756,K01923	map00230,map00250,map01100,map01110,map01130	F
	K0038_01379	hypothetical protein		K0038_01379				K0038_01426			8.80E-37	161.4	Gammaproteobacteria		0
	K0038_01380	Ribosomal large subunit pseudouridine synthase B		K0038_01380	K06182			K0038_01427		lyase activity	5.70E-38	164.1	Pseudomonas fluorescens group		0					C
	K0038_01381	GNAT family N-acetyltransferase		K0038_01381	K03827			K0038_01428	ybdG	Mechanosensitive ion channel	5.10E-103	380.6	Pseudomonas syringae group		0			K16053		M
	K0038_01382	ribosomal protein S12 methylthiotransferase		K0038_01382	K14441			K0038_01429			1.70E-17	97.4	Gammaproteobacteria		0
	K0038_01383	Cro/Cl family transcriptional regulator		K0038_01383	K07726			K0038_01430			1.50E-22	114	Gammaproteobacteria		0
	K0038_01384	transcription elongation factor GreB		K0038_01384				K0038_01431	ndpA	single-stranded RNA binding	5.50E-177	627.1	Bacteria		0			K06899		S
	K0038_01385	hypothetical protein		K0038_01385				K0038_01432	yhjC	Bacterial regulatory helix-turn-helix protein, lysR family	2.80E-105	388.7	Pseudomonas stutzeri group		0			K18900		K
	K0038_01386	potassium uptake protein		K0038_01386	K03549			K0038_01433		PFAM IstB domain protein ATP-binding protein	8.70E-30	136.3	Gammaproteobacteria		0			K02315		L
	K0038_01387	virulence factor family protein		K0038_01387				K0038_01434		reverse transcriptase	3.80E-49	200.7	Gammaproteobacteria	EC:2.7.7.49	0			K00986		L
	K0038_01388	membrane protein, putative		K0038_01388	K14205			K0038_01435		Transposase	1.50E-18	97.8	Gammaproteobacteria		0			K07484		L
	K0038_01391	DNA polymerase IV		K0038_01391	K02346			K0038_01436		sequence-specific DNA binding	4.10E-7	60.8	Bacteria	EC:3.5.1.1	0			K01424	map00250,map00460,map01100,map01110	K
	K0038_01392	lipoprotein		K0038_01392				K0038_01437			1.30E-3	50.1	Pseudomonas stutzeri group		0
	K0038_01393	prolyl-tRNA synthetase		K0038_01393	K01881			K0038_01438		SIR2-like domain	1.50E-194	685.6	Gammaproteobacteria		0					F
	K0038_01394	porin		K0038_01394	K18093			K0038_01439	choX	glycine, betaine	5.00E-37	160.2	Gammaproteobacteria		0			K02001,K02002	map02010	E
	K0038_01395	HIT domain-containing protein		K0038_01395				K0038_01440			5.20E-120	438.7	Gammaproteobacteria		0
	K0038_01396	Protein SlyX		K0038_01396	K03745			K0038_01442			6.80E-13	81.6	Proteobacteria		0
	K0038_01397	DNA-binding cold-shock protein		K0038_01397	K03704			K0038_01443		COG3666 Transposase and inactivated derivatives	3.10E-12	77	Gammaproteobacteria		0			K07487		L
	K0038_01398	dps family protein		K0038_01398	K04047			K0038_01444		Reverse transcriptase (RNA-dependent DNA polymerase)	7.10E-45	188.3	Cytophagia		0					L
	K0038_01399	hypothetical protein		K0038_01399				K0038_01445		Reverse transcriptase (RNA-dependent DNA polymerase)	3.50E-83	316.2	Gammaproteobacteria		0					L
	K0038_01400	aspartyl-tRNA synthetase		K0038_01400	K01876			K0038_01446	pin	Resolvase, N terminal domain	1.10E-18	99	Pseudomonas syringae group		0			K14060		L
	K0038_01401	hypothetical protein		K0038_01401				K0038_01448			8.40E-39	166.4	Bacteria		0
	K0038_01402	holliday junction resolvase		K0038_01402	K01159			K0038_01449			1.80E-13	82.4	Gammaproteobacteria		0
	K0038_01403	Holliday junction DNA helicase RuvA		K0038_01403	K03550			K0038_01450		viral genome integration into host DNA	4.10E-116	425.6	Gammaproteobacteria		0					L
	K0038_01404	Holliday junction branch migration DNA helicase RuvB		K0038_01404	K03551			K0038_01451		DNA integration	4.00E-76	292.7	Bacteria		0					L
[truncated: 3,674 more rows]

## Sheet: Table S4
	Table S4: EggNog Mapper results for Pst DC3000 reference genome
[truncated: 5,290 more rows]

[truncated: 12 more sheets: Table S5, Table S6, Table S7, Table S8, Table S9, Table S10, Table S11, Table S12, Table S13, Table S14, Table S15, Table S16]
